1 **Bacterial outer-membrane polysaccharide export (OPX) proteins occupy three structural**  
2 **classes with selective  $\beta$ -barrel porin requirements for polymer secretion**  
3  
4

5 Fares Saïdi<sup>1,2†</sup>, Utkarsha Mahanta<sup>3†</sup>, Adyasha Panda<sup>3</sup>, Nicolas Y. Jolivet<sup>1,2</sup>, Razieh Bitazar<sup>1,2</sup>, Gavin  
6 John<sup>4</sup>, Matthew Martinez<sup>5</sup>, Abdelkader Mellouk<sup>1,2</sup>, Charles Calmettes<sup>1,2</sup>, Yi-Wei Chang<sup>5</sup>, Gaurav  
7 Sharma<sup>3\*</sup>, Salim T. Islam<sup>1,2\*</sup>

8 <sup>1</sup> Institut National de la Recherche Scientifique (INRS), Centre Armand-Frappier Santé  
9 Biotechnologie, Université du Québec, Institut Pasteur International Network, Laval, QC, Canada

10 <sup>2</sup> PROTEO, the Quebec Network for Research on Protein Function, Engineering, and Applications,  
11 Université Laval, Québec, QC, Canada

12 <sup>3</sup> Institute of Bioinformatics and Applied Biotechnology (IBAB), Bengaluru, Karnataka, India

13 <sup>4</sup> Department of Pediatrics, Division of Infectious Diseases, Children's Hospital of Philadelphia,  
14 Philadelphia, PA, U.S.A.

15 <sup>5</sup> Department of Biochemistry and Biophysics, Perelman School of Medicine, University of  
16 Pennsylvania, Philadelphia, PA, U.S.A.

17 †co-1<sup>st</sup> authors

18  
19 \* corresponding authors:

20  
21 Salim T. Islam

22 salim.islam@inrs.ca

23 ORCID ID: 0000-0001-6853-8446

Gaurav Sharma

gauravsharma@ibab.ac.in

ORCID ID: 0000-0002-2861-7446

## 24 ABSTRACT

25 Secretion of high-molecular-weight polysaccharides across the bacterial envelope is  
26 ubiquitous as it enhances prokaryotic survival in (a)biotic settings. Such polymers are often  
27 assembled by Wzx/Wzy- or ABC transporter-dependent schemes that implicate outer-membrane  
28 (OM) polysaccharide export (OPX) proteins in polymer translocation to the cell surface. In the social  
29 predatory bacterium *Myxococcus xanthus*, exopolysaccharide (EPS)-pathway WzaX, major spore  
30 coat (MASC)-pathway WzaS, and biosurfactant polysaccharide-pathway WzaB were herein found to  
31 be truncated OPX homologues of *Escherichia coli* Wza lacking OM-spanning  $\alpha$ -helices.  
32 Comparative genomics across all bacteria, complemented with cryo-electron tomography cell-  
33 envelope analyses, revealed WzaX/S/B architecture to be the most common amongst three defined  
34 OPX-protein structural classes independent of periplasmic thickness. Fold-recognition and deep-  
35 learning analyses revealed the conserved *M. xanthus* proteins MXAN\_7418/3226/1916 (encoded  
36 adjacent to WzaX/S/B) to be integral OM  $\beta$ -barrels, with structural homology to the poly-*N*-acetyl-D-  
37 glucosamine synthase-dependent pathway porin PgaA. Such porins were identified in bacteria near  
38 numerous genes for all three OPX-protein classes. Interior MXAN\_7418/3226/1916  $\beta$ -barrel  
39 electrostatics were found to match known properties of their associated polymers. With  
40 MXAN\_3226 essential for MASC export, and MXAN\_7418 absence shown herein to compromise  
41 EPS translocation, these data support a novel secretion paradigm for Wzx/Wzy-dependent pathways  
42 in which those containing an OPX component that cannot span the OM instead utilize a  $\beta$ -barrel  
43 porin to mediate polysaccharide transport across the OM.

## 44 INTRODUCTION

45 Diverse bacteria associated with biotic and abiotic settings secrete high-molecular-weight  
46 (HMW) polysaccharides across the cell envelope to enhance their survival. Capsule polysaccharide  
47 (CPS) chains are tightly bound to the cell surface and form hydrated exclusionary barriers to  
48 molecule entry, whereas exopolysaccharide (EPS) polymers form a more loosely surface-associated  
49 glycocalyx around cells that contributes to biofilm matrix formation in aggregates (Whitfield *et al.*,  
50 2020). Certain HMW polysaccharides do not remain associated with the cell surface and are instead  
51 secreted to the extracellular milieu where they can influence bacterial physiology (Saïdi *et al.*, 2021,  
52 Islam *et al.*, 2020). In both monoderm (Gram-positive) and diderm (Gram-negative) bacteria,  
53 multiple secreted polymers often act in concert to modulate complex physiology (Pérez-Burgos &  
54 Søggaard-Andersen, 2020, Lavelle *et al.*, 2021, Franklin *et al.*, 2011).

55 *Myxococcus xanthus* is a Gram-negative bacterium that exhibits an intricate social  
56 multicellular lifestyle (Muñoz-Dorado *et al.*, 2016). This motile soil bacterium (Faure *et al.*, 2016,  
57 Islam & Mignot, 2015) is able to predate other bacteria (Seef *et al.*, 2021) and saprophytically feed  
58 on the degradation products. Under nutrient deprivation, cells in a swarm biofilm form myxospore-  
59 filled fruiting bodies through a developmental program resulting in a differentiated cell community  
60 (Muñoz-Dorado *et al.*, 2016). This complex lifecycle is modulated by the secretion of three known  
61 polysaccharides (Pérez-Burgos & Søggaard-Andersen, 2020). Cells constitutively produce EPS, a  
62 specific surface-associated polymer that forms a glycocalyx surrounding the cell body (Saïdi *et al.*,  
63 2021) and which constitutes the main matrix component in biofilms of this bacterium (Hu *et al.*,  
64 2013, Smaldone *et al.*, 2014). A biosurfactant polysaccharide (BPS) is also synthesized, but is  
65 instead secreted to the extracellular milieu (Islam *et al.*, 2020), where it functionally destabilizes the  
66 EPS glycocalyx, leading to a range of fundamental behavioural and surface-property changes at the  
67 single-cell level (Saïdi *et al.*, 2021). The synergy between EPS and BPS secretion as well as the  
68 spatio-specific production patterns of the two polymers (Islam *et al.*, 2020) also impacts the internal  
69 architecture of *M. xanthus* swarm biofilms, as well as their Type IV pilus (T4P)-dependent expansion  
70 due to impacts on T4P production, stability, and positioning (Saïdi *et al.*, 2021). Finally, the major  
71 spore coat (MASC) polymer is produced by spore-forming cells undergoing development, providing  
72 a protective coat to cover nascent myxospores and provide resistance to environmental stresses  
73 (Holkenbrink *et al.*, 2014, Wartel *et al.*, 2013).

74 Each *M. xanthus* polysaccharide is produced by a separate Wzx/Wzy-dependent assembly  
75 pathway (Islam *et al.*, 2020, Pérez-Burgos *et al.*, 2020, Holkenbrink *et al.*, 2014), the components for  
76 which have the suffixes X (exopolysaccharide), B (biosurfactant), or S (spore coat). Therein, cluster-  
77 specific glycosyltransferases synthesize polymer repeat units atop an undecaprenyl pyrophosphate  
78 (UndPP) lipid anchor at the cytoplasmic leaflet of the inner membrane (IM). UndPP-linked repeats  
79 are then translocated across the IM via the Wzx flippase (Islam *et al.*, 2012, Islam *et al.*, 2013a, Islam  
80 *et al.*, 2010), followed by polymerization at the periplasmic leaflet of the IM by Wzy (Islam *et al.*,  
81 2011, Islam *et al.*, 2013b) to modal lengths governed by the Wzc polysaccharide co-polymerase  
82 (PCP) in non-O-antigen systems (**Fig. 1A**) (Islam & Lam, 2014, Whitfield *et al.*, 2020). In *M.*  
83 *xanthus*, WzcB possesses an integrated cytosolic bacterial tyrosine autokinase (BYK) domain (PCP-  
84 2A class), whereas WzcX and WzcS do not (PCP-2B class); the EPS and MASC pathways thus  
85 encode a separate BYK (Wze) for association with the cognate PCP (Islam *et al.*, 2020). The Wzb  
86 bacterial tyrosine phosphatase (BYP) protein in turn regulates the state of PCP-2A Wzc and PCP-2B-  
87 associated Wze phosphorylation (Mori *et al.*, 2012). Wzb-mediated dephosphorylation of BYK  
88 domains has been proposed to drive Wzc octamerization, in turn affecting Wzy-mediated  
89 polymerization and interaction with the outer-membrane polysaccharide export (OPX) Wza  
90 translocon needed for polymer transport through the periplasm and across the outer membrane (OM)  
91 (Yang *et al.*, 2021) (**Fig. 1A**). Such pathways are one of the most widespread bacterial assembly  
92 schemes for HMW polysaccharides, responsible for synthesizing diverse products such as Group 1  
93 CPS and Group 4 CPS (i.e. “O antigen” capsule) as well as colanic acid polymers in enterobacteria  
94 (Sande & Whitfield, 2021), in addition to holdfast polysaccharide in *Caulobacter crescentus*, (Toh *et*  
95 *al.*, 2008), and xanthan in *Xanthomonas campestris* (Becker, 2015). In Group 1 CPS systems, the 18-  
96 stranded integral OM  $\beta$ -barrel Wzi (internally occluded by an  $\alpha$ -helical plug domain) is also  
97 important as it displays lectin-like characteristics implicated in capsule structure organization  
98 (Bushell *et al.*, 2013).

99 Secreted polymers can also be synthesized by an ABC transporter-dependent scheme in  
100 which UndPP-linked polymers are built by sugar unit addition at the cytoplasmic leaflet of the IM,  
101 with the polymer generated entirely in the cytoplasm. Subsequent ATP hydrolysis by the transporter  
102 drives polymer transport across the IM, after which PCP and OPX proteins are needed for the  
103 secretion of polymer through the periplasm and across the OM. These biosynthesis pathways are  
104 implicated in the secretion of polysialic acid Group 2 CPS polymers from pathogenic extraintestinal

105 *E. coli*, as well as similar structures in *Neisseria meningitidis* and *Haemophilus influenza* (Willis &  
106 Whitfield, 2013).

107 Alternatively, HMW polymers such as alginate in *Pseudomonas aeruginosa*, cellulose in  
108 *Salmonella enterica*, and poly-*N*-acetyl-D-glucosamine (PNAG) in *Acinetobacter baumannii* are  
109 produced via a synthase-dependent scheme in which the addition of a monosaccharide in the  
110 cytoplasm by an integral IM synthase results in export of the polymer by a similar amount from the  
111 cell surface. Polymer transport through the periplasm is mediated by a protein scaffold containing  
112 TPR repeats followed by translocation across the OM through an integral OM  $\beta$ -barrel porin structure  
113 (Whitney & Howell, 2013). While similarities exist between Wzx/Wzy- and ABC transporter-  
114 dependent pathways (e.g. the presence of PCP and OPX proteins), no such schematic crossover with  
115 proteins from synthase-dependent pathways has been identified.

116 In both Wzx/Wzy- and ABC transporter-dependent pathways, OPX-family proteins are  
117 portrayed as forming an oligomeric channel of contiguous domains to allow polymer secretion  
118 through the periplasm and across the OM (Whitfield *et al.*, 2020). All OPX proteins share a  
119 conserved periplasmic N-terminal Poly\_export domain (Pfam: PF02563, also called a PES  
120 [polysaccharide export sequence] motif), followed by at least one copy of a soluble ligand-binding  $\beta$ -  
121 grasp (SLBB) domain (Pfam: PF10531) (Sande *et al.*, 2019, Cuthbertson *et al.*, 2009), which is  
122 predicted to interact with the sugar polymer in the periplasm (Burroughs *et al.*, 2007). OPX protein  
123 domain architecture diverges at this point. In the prototypic OPX Wza from *E. coli* group 1 CPS  
124 (Wza<sub>Ec</sub>) — which is the only OPX protein with a solved 3D structure — after one Poly\_export (D1)  
125 and two SLBB domains (D2 & D3), the protein contains a Wza\_C domain (Pfam: PF18412) at its C-  
126 terminus, which forms a 35-residue amphipathic  $\alpha$ -helical tract (D4) that crosses the OM (Dong *et*  
127 *al.*, 2006) (**Fig. 1A**). Elucidation of the Wza<sub>Ec</sub> X-ray crystal structure (PDB: 2J58) was  
128 revolutionary as it represented the first instance of such a fold in an integral OM protein. As part of  
129 the Wza<sub>Ec</sub> oligomer, 8 copies of the  $\alpha$ -helical Wza\_C domain were shown to form a pore-like  
130 structure, through which it is proposed that secreted polysaccharides exit the cell (Dong *et al.*, 2006,  
131 Nickerson *et al.*, 2014) (**Fig. 1A**). Instead of a classical Wza\_C domain, OPX proteins from ABC  
132 transporter-dependent Group 2 CPS pathways usually contain a C-terminal Caps\_synth\_GfcC (Pfam:  
133 PF06251, formerly DUF1017) module (Cuthbertson *et al.*, 2009), structurally similar to the stand-  
134 alone GfcC protein (PDB: 3P42) from Group 4 Wzx/Wzy-dependent CPS pathways (Sande *et al.*,  
135 2019). GfcC contains domains comparable to D2 and D3 from Wza<sub>Ec</sub>, as well as a D4-like

136 amphipathic  $\alpha$ -helix; however, the GfcC D4-like helix spanning the final 21 residues of the protein is  
137 40% shorter than Wza<sub>Ec</sub> D4, bent at both ends, and structurally locked (Sathiyamoorthy *et al.*, 2011).  
138 This overall OPX architecture is typified by the Group 2 CPS pathway protein KpsD from *E. coli*  
139 (KpsD<sub>Ec</sub>) (Sande *et al.*, 2019). Though it is uncertain if the C-terminal domain of KpsD<sub>Ec</sub> is able to  
140 span the OM, KpsD<sub>Ec</sub> epitopes have previously been detected at the cell surface via anti-KpsD<sub>Ec</sub>  
141 antibody labelling (McNulty *et al.*, 2006). Numerous other annotated OPX proteins have been shown  
142 to either (i) contain considerable-yet-uncharacterized protein sequences following their most C-  
143 terminal identified domain, or (ii) be considerably shorter than either Wza<sub>Ec</sub> or KpsD<sub>Ec</sub>, with  
144 architecture beyond the Poly\_export and SLBB domains largely absent (Cuthbertson *et al.*, 2009).  
145 Ultimately, for OPX proteins that lack a canonical OM-spanning Wza\_C domain, the manner by  
146 which the respective secreted polymers traverse the asymmetric OM bilayer remains a fundamental  
147 and pertinent question that has yet to be resolved.

148         Herein, we reveal that the WzaX, WzaB, and WzaS OPX proteins for the respective *M.*  
149 *xanthus* EPS, BPS, and MASC pathways contain typical N-terminal “Poly\_export–SLBB”  
150 architecture but lack a C-terminal OM-spanning Wza\_C domain. Comparative genomics analyses  
151 reveal this architecture to be the most common amongst three distinct structural classes of OPX  
152 proteins across all bacteria. However, in the *M. xanthus* EPS, BPS, and MASC biosynthetic clusters,  
153 a conserved  $\beta$ -barrel protein (MXAN\_7418/MXAN\_1916/MXAN\_3226) is encoded immediately  
154 adjacent to the genes for WzaX/WzaB/WzaS (respectively). Fold-recognition and deep-learning  
155 analyses reveal these adjacently-encoded proteins to be 18-stranded integral OM  $\beta$ -barrels with  
156 structural homology to the barrel domain of the porin PgaA, required for PNAG secretion across the  
157 OM by synthase-dependent pathways. In turn, PgaA-like  $\beta$ -barrel proteins are shown to be encoded  
158 near numerous genes representing all three OPX structural classes in diverse Gram-negative bacteria.  
159 The interior electrostatics of the *M. xanthus*  $\beta$ -barrels match known properties of their associated  
160 polymers, and deletion of the MXAN\_7418  $\beta$ -barrel is shown to compromise EPS secretion.  
161 Together with the known requirement for the MXAN\_3226  $\beta$ -barrel for MASC secretion  
162 (Holkenbrink *et al.*, 2014), these data support a novel secretion paradigm for Wzx/Wzy-dependent  
163 pathways in which those containing an OPX component that cannot span the OM instead utilize a  $\beta$ -  
164 barrel porin to mediate translocation of HMW polymers across the OM.

165 **Figure 1. Wzx/Wzy-dependent polysaccharide assembly-and-secretion. A)** Pathway schematic.  
166 *Inset:* The Wza<sub>Ec</sub> X-ray crystal structure octamer (PDB: 2J58) has been differentially coloured to  
167 highlight the position of each chain in the structure. The D1 (Poly\_export), D2 & D3 (both SLBB), and  
168 D4 (Wza\_C) domains have been indicated, with smooth loops. **B)** Tertiary structure models of *M.*  
169 *xanthus* EPS-pathway WzaX (aa 51–212), MASC-pathway WzaS (aa 32–190), and BPS-pathway  
170 WzaB (aa 38–202) based on the Wza<sub>Ec</sub> structure (aa 22–376, depicted with a N-terminal lipid anchor).  
171 Structures are displayed with smooth loops, highlighted  $\beta$ -sheets (*yellow*) and  $\alpha$ -helices (*red*), with the  
172 various N- and C- termini indicated.

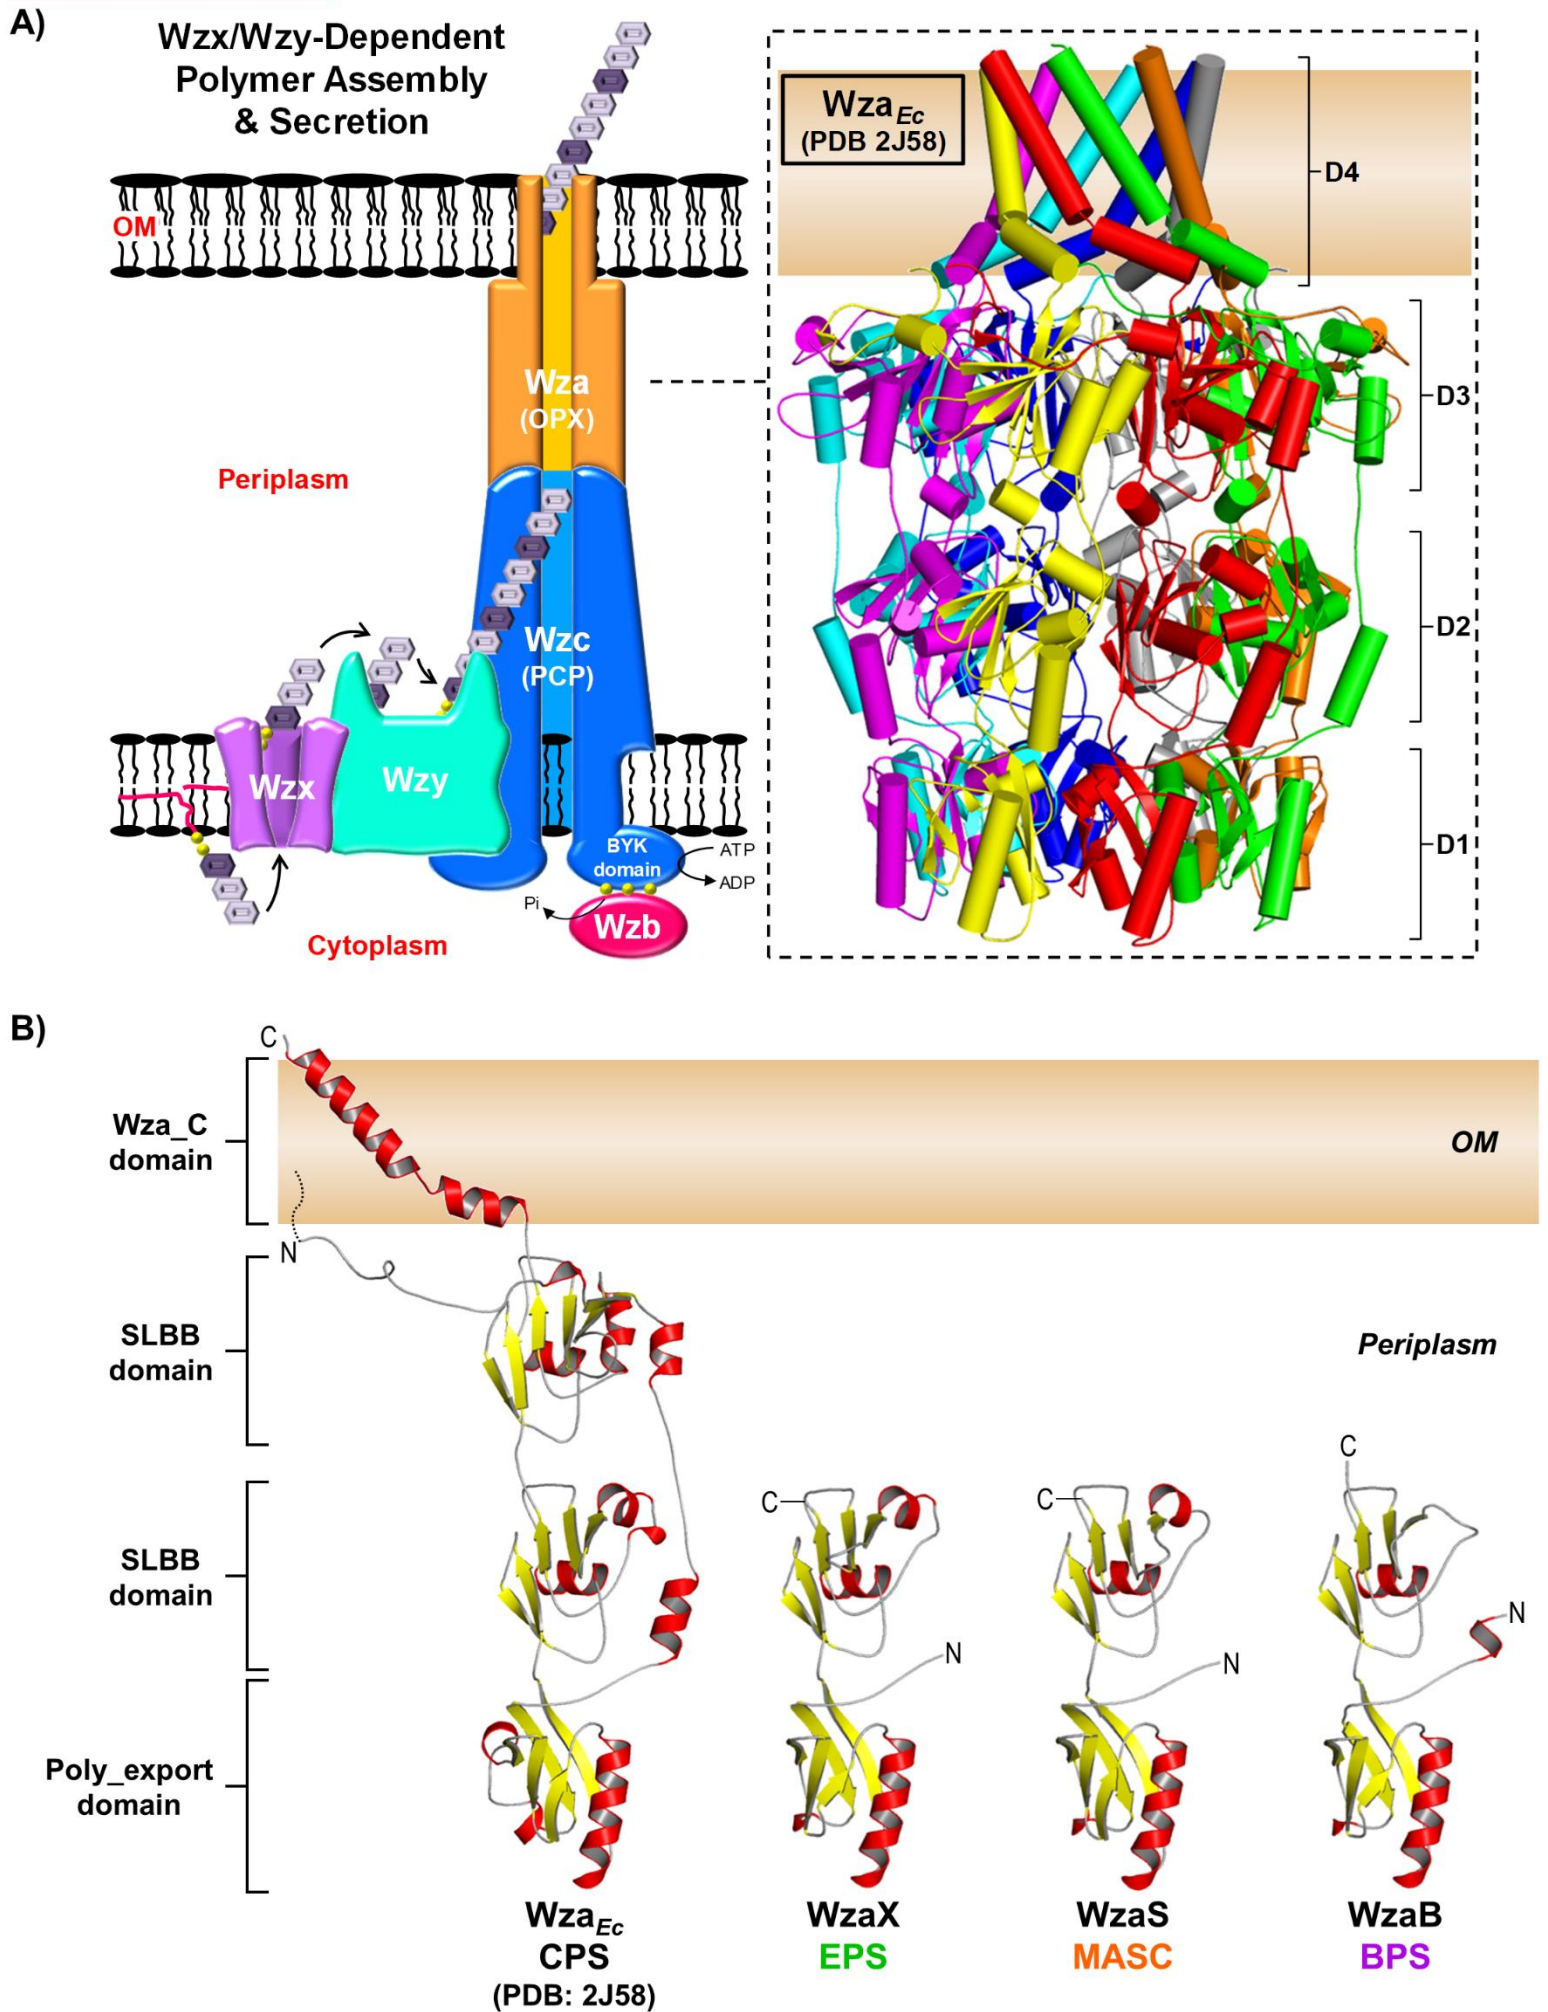



174 **RESULTS**

175 ***The M. xanthus OPX proteins WzaX, WzaS, and WzaB lack an OM-spanning  $\alpha$ -helix domain***

176 Each of the WzaX/S/B OPX proteins is essential for the secretion of its respective  
177 EPS/MASC/BPS polymer in *M. xanthus* (Islam *et al.*, 2020, Holkenbrink *et al.*, 2014). However, as  
178 each of WzaX, WzaS, and WzaB has a considerably shorter amino acid sequence than that of Wza<sub>Ec</sub>  
179 (44, 50, and 46% smaller, respectively), we sought to better understand the structural implications of  
180 this difference. Fold-recognition analysis of each protein revealed 100%, 100%, and 99.9%  
181 probability matches (respectively) to the N-terminal half of the high-resolution Wza<sub>Ec</sub> X-ray crystal  
182 structure. However, tertiary structure modelling of WzaX, WzaS, and WzaB against the Wza<sub>Ec</sub> 3D  
183 structure revealed WzaX, WzaS, and WzaB to be missing the 2<sup>nd</sup> SLBB domain (i.e. D3), and more  
184 importantly the crucial OM-spanning  $\alpha$ -helical Wza\_C domain (i.e. D4), of Wza<sub>Ec</sub> (**Fig. 1B**). The  
185 absence of such an OM-spanning domain is consistent with the lack of WzaX/S/B detection in  
186 proteomic analyses of OM vesicle (OMV) and biotinylated surface-protein samples (Kahnt *et al.*,  
187 2010), despite the constitutive expression of the *wzaX/S/B* genes throughout the *M. xanthus* lifecycle  
188 (Muñoz-Dorado *et al.*, 2019, Sharma *et al.*, 2021).

189 **Figure 2. Structural diversity of OPX proteins. A)** Domain organization and abundance of  
190 bacterial OPX protein classes identified in the myxobacterial (MYXO, 61 genomes, 506 873 proteins  
191 analyzed), representative (REP, 3662 genomes, 13 600 490 proteins analyzed), and NCBI non-  
192 redundant (NR, 371 327 556 proteins analyzed) databases. The Poly\_export (PF02563), SLBB  
193 (PF10531), Wza\_C (PF18412), and Caps\_synth\_GfcC (PF06251) Pfam domains were used to  
194 query the various databases, followed by fold-recognition analysis using HHpred against the 3D X-  
195 ray crystal structures of Wza<sub>Ec</sub> (PDB: 2J58) and GfcC (PDB: 3P42). The number of repeated copies  
196 is indicated under each domain depiction. The number of OPX hits (*bold*) for a specific class is  
197 indicated as well as the proportion of hits from each database (*italics*) represented by the hits. **B)**  
198 Sequence logo of the consensus amino acids constituting the OM-spanning  $\alpha$ -helix based on a  
199 multiple-sequence alignment of 1 586 Class 1 OPX proteins. The region of sequence alignment  
200 with Wza<sub>Ec</sub> is indicated and depicted with the associated secondary structure from the Wza<sub>Ec</sub> X-ray  
201 crystal structure (PDB: 2J58) (Dong *et al.*, 2006). Also depicted is the region of sequence alignment  
202 with a previously-published optimized Wza\_C synthetic peptide (based on 94 close Wza<sub>Ec</sub>-related  
203 homologues) capable of spontaneously inserting into lipid bilayers and self-assembling into stable  $\alpha$ -  
204 barrel pores (Mahendran *et al.*, 2017). **C)** Sequence logo of the consensus amino acids  
205 constituting the putative OM-spanning  $\alpha$ -helix based on a multiple-sequence alignment of 452 Class  
206 2B OPX proteins. The region of sequence alignment with KpsD<sub>Ec</sub> is indicated, along with the  
207 predicted KpsD<sub>Ec</sub> secondary structure. The position of observed (*dark-colored*) and predicted (*light-*  
208 *colored*)  $\alpha$ -helices (*boxes*) and  $\beta$ -strands (*arrows*) have been indicated.

## FIGURE 2

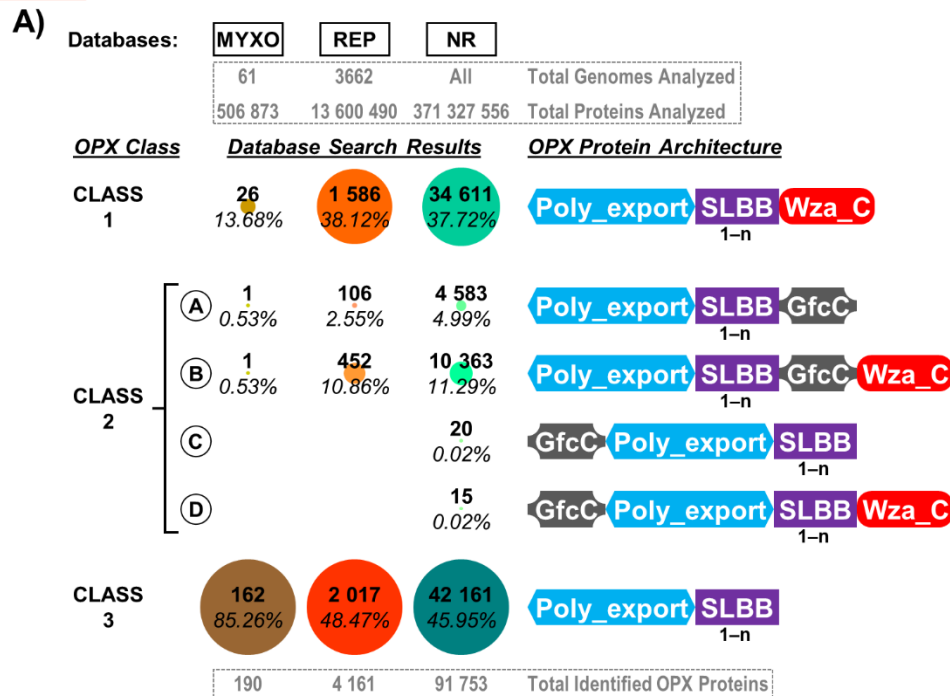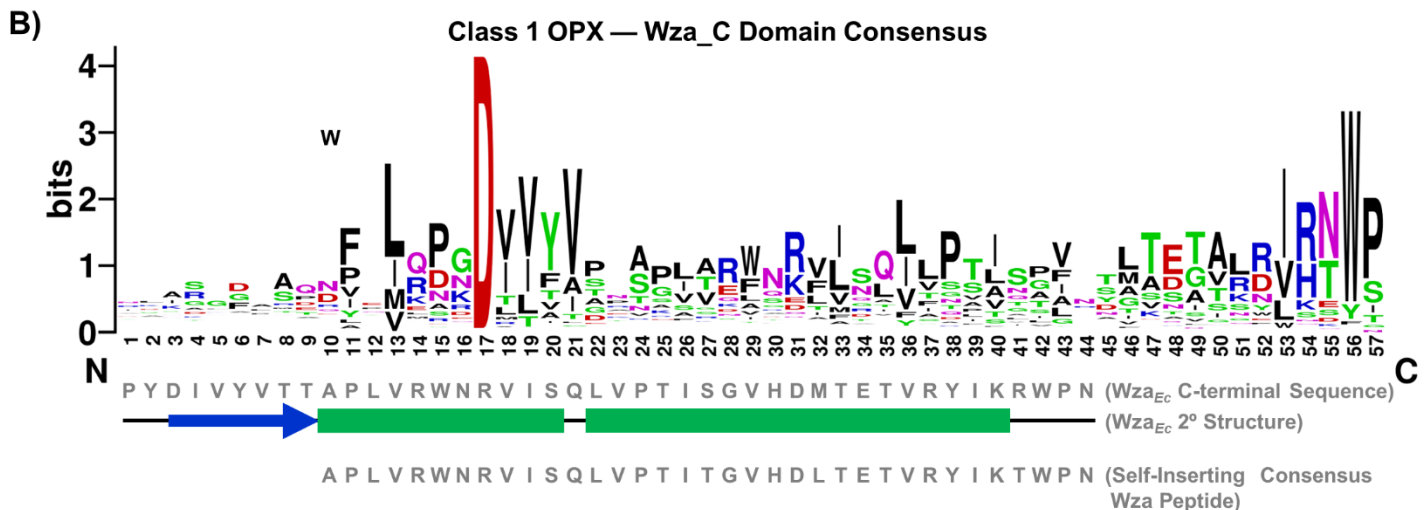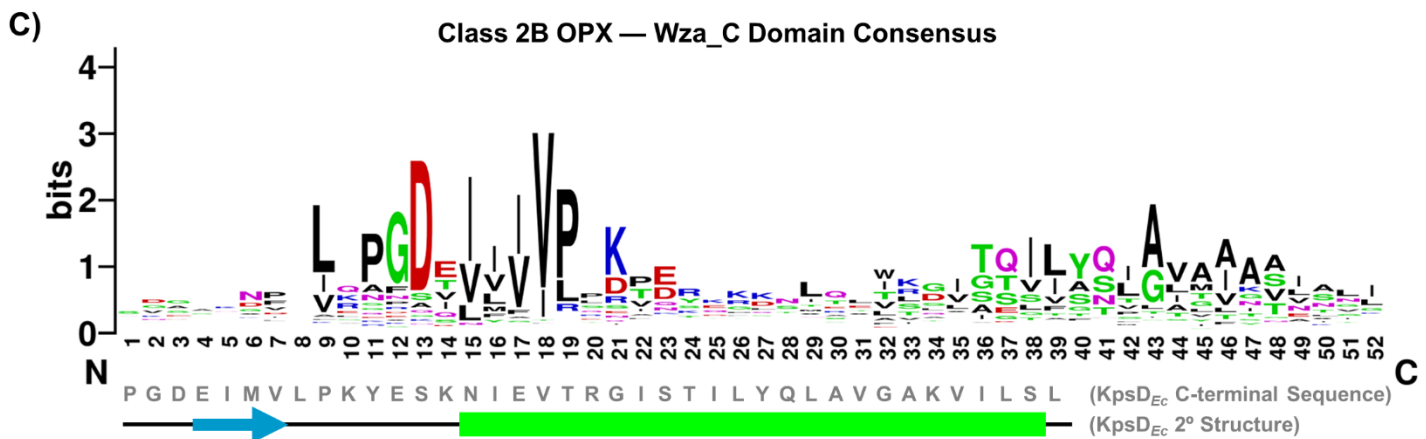

## 210 *OPX proteins constitute three distinct structural classes*

211 To determine if the absence of the Wza\_C domain was an aberration confined to the subset of  
212 OPX proteins from *M. xanthus* under study, we first performed a comparative genomics analysis  
213 using profile-based homology searches across three different datasets: (i) 61 myxobacterial genomes  
214 (MYXO) (**Supplementary Table S1**), (ii) 3662 representative genomes (REP) (**Supplementary**  
215 **Table S2**), and (iii) the non-redundant (NR) NCBI database (371 327 556 proteins at 100% identity  
216 as of June 10, 2021) (**Supplementary Table S3**), to identify encoded OPX proteins, using  
217 PF02563 [Poly\_export], PF10531 [SLBB], PF18412 [Wza\_C], and PF06251 [Caps\_synth\_GfcC];  
218 used here as “GfcC”) as our query domains. These profile-based analyses identified diverse putative  
219 OPX homologues that we divided into three distinct classes according to their domain architecture  
220 (**Fig. 2A**). The first set of OPX proteins was found to contain Poly\_export–SLBB<sub>(1–14)</sub> architecture  
221 ending with a C-terminal OM-spanning Wza\_C domain, similar to Wza<sub>Ec</sub>, and was assigned the  
222 designation “Class 1” (**Fig. 2A**). A second set of OPX proteins was found to possess Poly\_export–  
223 SLBB<sub>(1–6)</sub>–GfcC architecture similar to KpsD<sub>Ec</sub>, ending with or without a C-terminal OM-spanning  
224 Wza\_C domain, and was assigned the designation “Class 2”. However, most OPX proteins were  
225 found to contain only Poly\_export–SLBB<sub>(1–7)</sub> architecture lacking either a Wza\_C or GfcC domain;  
226 these hits were designated “Class 3”; however, many of these initial hits were found to contain  
227 additional amino acids that may have remained uncharacterized following sequence-based domain  
228 detection. Therefore, to probe these partially-characterized hits in more detail, we subjected all  
229 identified OPX proteins to fold-recognition analysis using HHpred to identify matches with more  
230 remote sequence homology but conserved structural properties. These analyses resulted in  
231 reclassification of several original Class 3 hits to either Class 1 or Class 2

232 Incidentally for Class-1 OPX proteins, while the secondary structure was conserved,  
233 considerable sequence variation was detected within certain regions of the putative OM-spanning  
234 Wza\_C domains, with this domain extending up to 48 residues in length (compared to 35 residues in  
235 Wza<sub>Ec</sub>) (**Fig. 2B**). As per the MYXO/REP/NR databases, 13.7/38.1/37.7% of OPX proteins possess  
236 Class 1 Wza<sub>Ec</sub>-like organization with a putative OM-spanning C-terminal  $\alpha$ -helix (**Fig. 2A**,  
237 **Supplementary Tables S1, S2, S3**). Class 1 OPX proteins were found to have a median length  
238 of 378 amino acids and most (1233/1586, ~78%) were predicted to be lipoproteins with Sec/SPII  
239 signal sequences.

240 These proteins were largely confined to the phylum Proteobacteria (837/1632 genomes;  
241 ~51%) with a predominance in classes Gammaproteobacteria (430/760 genomes; ~56%),  
242 Alphaproteobacteria (232/410 genomes; ~57%), and Betaproteobacteria (133/274 genomes; ~49%),  
243 and representation also in phyla Bacteroidetes (67/283 genomes; ~24%), Planctomycetes (56/62  
244 genomes; ~90%), and Cyanobacteria (46/55 genomes; ~84%) (**Supplementary Table S2**). Based  
245 on species-level PSORTdb classification, the REP database contains 698 Gram-positive and 1381  
246 Gram-negative organisms. Our analysis revealed that Class 1 OPX proteins are encoded by many  
247 Gram-negative bacteria (639/1381 genomes, ~46%), whereas these proteins were completely absent  
248 in Gram-positive species (**Supplementary Table S2**).

249 Our MYXO/REP/NR database comparative genomic analysis revealed that Class 2 OPX  
250 proteins can be further divided into four subclasses. Proteins belonging to Class 2A contain  
251 Poly\_export–SLBB<sub>(1–n)</sub>–GfcC architecture, whereas those assigned to Class 2B possess Poly\_export–  
252 SLBB<sub>(1–n)</sub>–GfcC–Wza\_C architecture ending with an OM-spanning  $\alpha$ -helical domain. Classes 2C  
253 and 2D are variations of Classes 2A and 2B (respectively) where the Poly\_export domain is preceded  
254 by a GfcC domain; however, only 20 Class 2C and 15 Class 2D proteins were identified across the  
255 entire NR database.

256 Class 2A OPX proteins constitute 0.5/2.6/5.0% of all OPX proteins identified in the  
257 MYXO/REP/NR databases, with a median length of 605 amino acids. These proteins were found to  
258 be encoded mainly in Proteobacteria (77/1632 genomes, ~5%), Bacteroidetes (9/283 genomes, ~3%),  
259 and Acidobacteria (3/14 genomes, ~21%). Taxonomy orders Alteromonadales (14/83 genomes,  
260 ~17%), Campylobacterales (10/88 genomes, ~11%), Burkholderiales (9/175 genomes, ~5%), and  
261 Oceanospirillales (9/43 genomes, ~21%) display the maximum representation for Class 2A. In  
262 addition, Class 2A OPX proteins are encoded in only ~5% (66/1381 genomes) of Gram-negative  
263 bacteria and are completely absent among Gram-positive species (**Supplementary Table S4**).

264 Class 2B OPX proteins represent 0.5/10.9/11.3% of all OPX proteins identified in the  
265 MYXO/REP/NR databases (**Fig. 2A, Supplementary Table S1, S2, S3**). The median length of  
266 Class 2B proteins was found to be 824 amino acids, with most (375/452, ~83%) found to possess  
267 standard Sec/SPI secretory signal peptides. These proteins were largely encoded by Proteobacteria  
268 (226/1632 genomes, ~14%), Bacteroidetes (107/283 genomes, ~38%) and Cyanobacteria (14/55  
269 genomes, ~25%). At the level of Order, Alteromonadales (66/83 genomes, ~80%), Bacteroidales

270 (38/52 genomes, ~73%), Cytophagales (23/50 genomes, 46%), and Vibrionales (20/46 genomes,  
271 ~43%) were found to contain the most organisms encoding Class 2B OPX architecture. Class 2B  
272 OPX proteins have representation in only ~18% (243/1381 genomes) of Gram-negative organisms  
273 and are absent in Gram-positive bacteria (**Supplementary Table S4**).

274 Class 2B architecture is typified by KpsD<sub>Ec</sub>. Consistent with a previous report (Sande *et al.*,  
275 2019), fold-recognition analysis of KpsD<sub>Ec</sub> revealed that most of its N-terminus is structurally  
276 homologous to Wza<sub>Ec</sub>, while the bulk of its C-terminus is a structural match to the standalone GfcC  
277 protein (**Supplementary Fig. S1A**). However, the extreme C-terminus of KpsD<sub>Ec</sub> — i.e. the  
278 portion of KpsD<sub>Ec</sub> surpassing the end of structural homology with the GfcC D4  $\alpha$ -helix — was found  
279 to have considerable structural homology with the most C-terminal region of Wza<sub>Ec</sub>, including a 25-  
280 residue tract with  $\alpha$ -helical propensity matched to the OM-spanning  $\alpha$ -helical tract of Wza<sub>Ec</sub>  
281 (**Supplementary Fig. S1B,C**). A similarly-extended C-terminal  $\alpha$ -helix was found throughout the  
282 Class 2B OPX hits identified herein, with considerable variation in certain regions of its sequence,  
283 and extending to 38 residues (compared to 25 residues in KpsD<sub>Ec</sub>) (**Fig. 2C**). This observation  
284 supports the notion that a part of KpsD<sub>Ec</sub> (and by extension Class 2B OPX proteins) may indeed be  
285 able to span the OM and access the cell surface.

286 Finally, Class 3 OPX proteins with Poly\_export–SLBB<sub>(1–n)</sub> architecture (but no appreciable  
287 peptide sequence following their respective C-terminal-most SLBB domain), with a median length of  
288 256 amino acids, represent a plurality (~85/49/46%) of OPX proteins identified across the  
289 MYXO/REP/NR databases (**Fig. 2A, Supplementary Table S1, S2, S3**). Almost 50% are  
290 predicted lipoproteins (Sec/SPII signal sequences) while ~30% are secreted proteins (Sec/SPI signal  
291 sequences). Such OPX proteins (i.e. those lacking a Wza<sub>C</sub> or GfcC) domain were found across  
292 multiple bacterial classes such as Alphaproteobacteria (274/410 genomes, ~67%),  
293 Gammaproteobacteria (247/760 genomes, ~33%), Betaproteobacteria (100/274 genomes, ~37%),  
294 Flavobacteria (116/133 genomes, ~87%), and Deltaproteobacteria (66/82 genomes, ~80%).  
295 Expectedly, our analysis detected Class 3 OPX proteins in Gram-negative bacteria (600/1382  
296 genomes, ~43%), but also intriguingly in several Gram-positive organisms (52/699 genomes, ~7%)  
297 (**Supplementary Table S4**). Of note, the proportions of each Class of OPX protein detected in the  
298 REP database were highly reflective of those found in the NR database (**Fig. 2A**), reinforcing the  
299 utility and applicability of the REP database.

300            Within the MXYO dataset, we identified 26 Class 1, two Class 2, and 162 Class 3 OPX  
301 proteins (**Fig. 2A**, **Supplementary Table S1**). Class 3 OPX proteins were encoded in all 61  
302 myxobacterial organisms, without any exception, in the range of 1-4 proteins. Class 1 OPX proteins  
303 were encoded by several members of the suborder Cystobacterineae such as *Anaeromyxobacter*,  
304 *Cystobacter*, *Coralloccoccus*, *Pyridicoccus*, and *Simulacricoccus*. However, Class 1 OPX proteins  
305 were not represented within any species of the genus *Myxococcus*. Class 2 OPX proteins were only  
306 present in two myxobacteria, namely *Sandaracinus amylolyticus* (Class 2A OPX) and *Haliangium*  
307 *ochraceum* (Class 2B OPX). All proteins in the MYXO dataset belonging to the three OPX classes  
308 possess similar median lengths to those described for all OPX proteins in the REP database (i.e.  
309 MYXO Class 1, 373 amino acids; MYXO Class 2, 550 amino acids; MYXO Class 3, 205 amino  
310 acids).

311 **Figure 3. Phylogenetic tree of OPX proteins.** Sequence alignment of all “Poly\_export” domains  
312 as identified in 4 161 OPX proteins in the REP dataset was used to generate a maximum-likelihood  
313 phylogenetic tree. The classes of OPX proteins (*inner tree*) and their respective phyla (*outer ring*)  
314 have been coloured accordingly for effective visualization.



**Colored Ranges (Phylum-Level Taxonomy)**

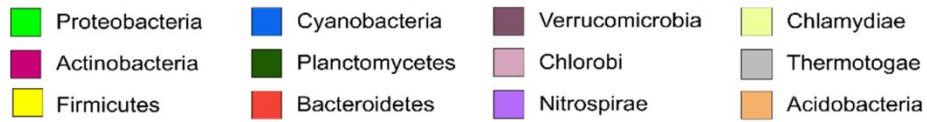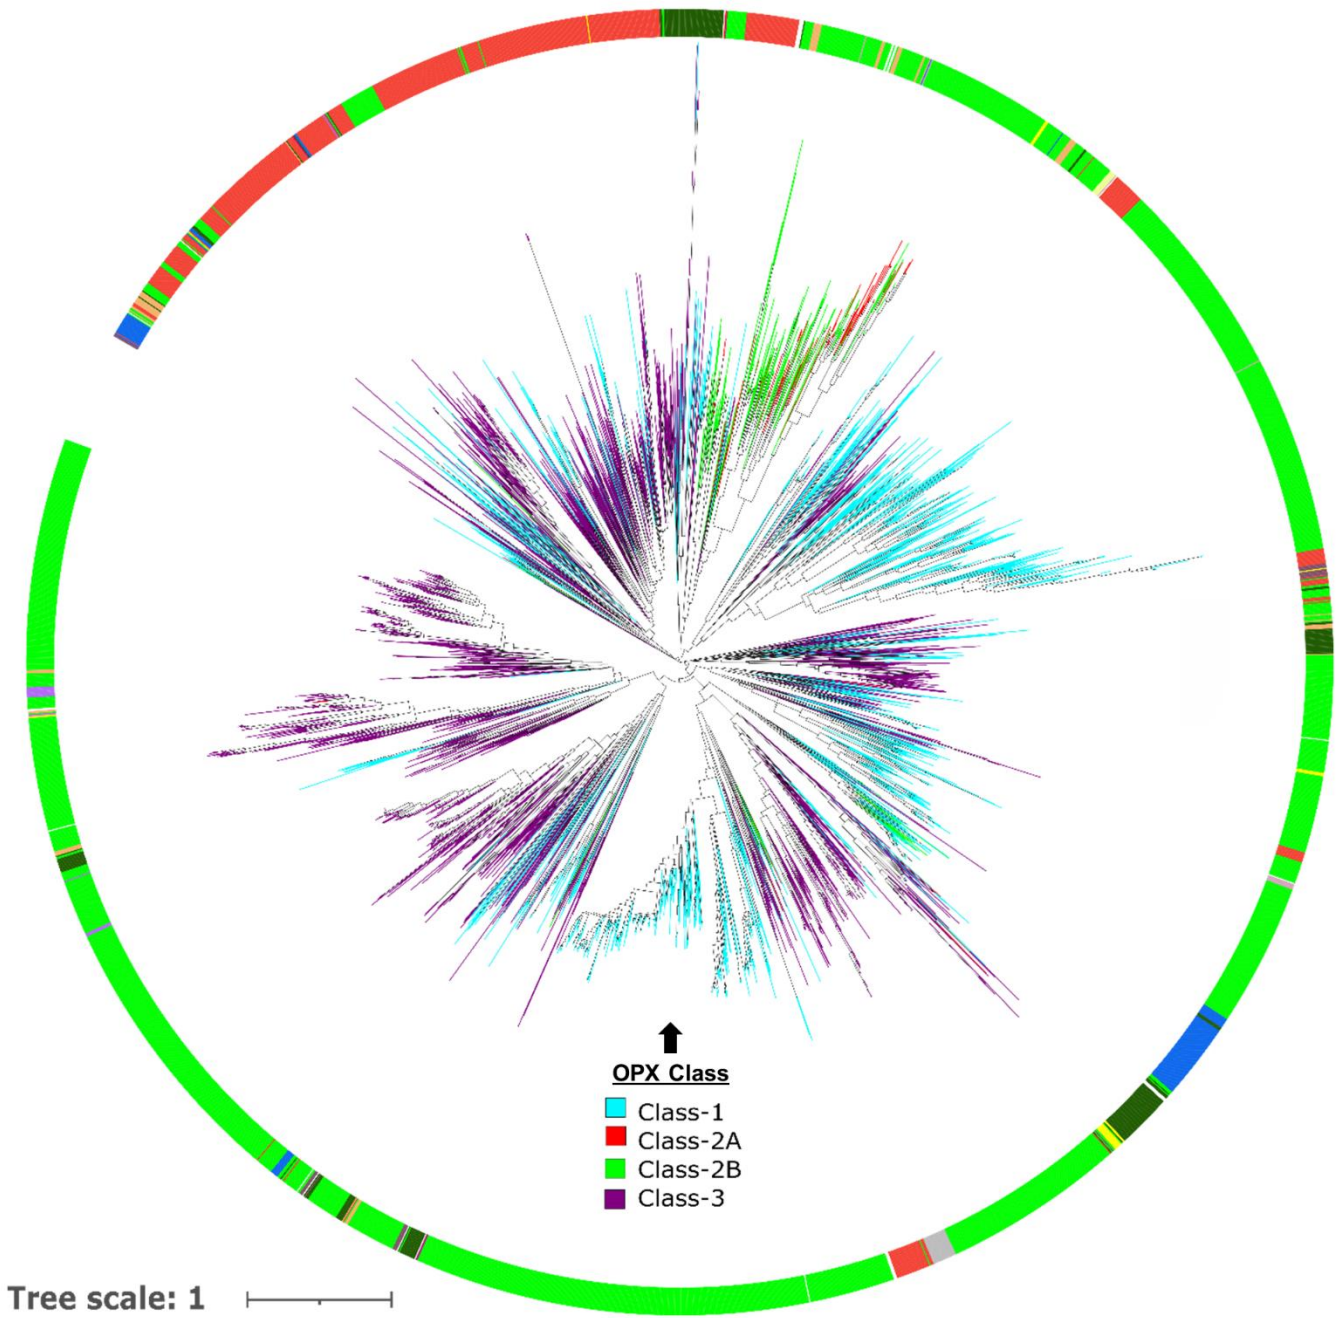

316 *Molecular phylogenetics suggests the coevolution of three OPX protein Classes*

317 Taken together, these analyses have identified three principal structural classes of OPX  
318 proteins, namely: (i) Class 1 (i.e. *Wza<sub>Ec</sub>*-like with a canonical OM-spanning  $\alpha$ -helix), (ii) Class 2 (i.e.  
319 *KpsD<sub>Ec</sub>*-like with a potentially OM-spanning  $\alpha$ -helix at the terminus of the GfcC domain), and (iii)  
320 the majority Class 3 (i.e. those with structural homology to the *Wza<sub>Ec</sub>* N-terminus, but with no  
321 discernible OM-spanning domain). By extension, *WzaX/S/B* from *M. xanthus* (**Fig. 1B**) are thus  
322 Class 3 OPX proteins that share the domain architecture of most other OPX proteins encoded by  
323 bacteria (**Fig. 2A**). Given that all OPX proteins among the three different classes have a conserved  
324 “Poly\_export” domain, this can be utilized as a phylogenetic marker. Therefore, based on the  
325 hmmscan results, we extracted the location of the “Poly\_export” domain from REP dataset hits,  
326 aligned those sequences using MUSCLE, and generated a maximum-likelihood phylogeny. The  
327 generated phylogeny (**Fig. 3**) revealed that Class 1 and Class 3 OPX proteins are interspersed with  
328 each other in all taxonomic clades, suggesting that proteins from these two classes have co-evolved  
329 by losing or gaining the *Wza\_C* segment in closely-related organisms. However, Class 2A and Class  
330 2B are both present in nearby sister clades and away from Class 1 and Class 3. This denotes that  
331 Class 2 OPX proteins, similar to proteins from Class 1 and Class 3, are highly similar to each other  
332 and have coevolved by losing or gaining their respective *Wza\_C* segments.

333 **Figure 4. Cell envelope ultrastructure in Gram-negative bacteria. A)** Cryo-electron microscopy  
334 tomogram slice of a *M. xanthus* cell, showing the IM, OM, and intervening periplasmic space and  
335 their respective measured thicknesses. **B)** Comparison of means (*black bar*) for periplasmic  
336 distances in 40 microbial species ( $\pm$  SEM). Individual replicate measurements are indicated (*red*  
337 *dots*). Data from organisms with increasing mean periplasmic thickness values have been depicted  
338 from left to right, grouped according to Gram-negative, Gram-positive, or Archaea organism  
339 designation. **C)** Scatterplot of mean periplasmic thickness values plotted against the length of each  
340 OPX protein from the same organism. Data points have been coloured according to the Class of  
341 OPX protein assigned herein. No correlation was detected between periplasmic thickness and (i)  
342 overall OPX protein length (Pearson coefficient: 0.1450; Spearman coefficient: 0.05884, calculated  
343 over 92 data pairs), (ii) Class 1 OPX hits (Pearson coefficient: 0.07250; Spearman coefficient:  
344 0.2318; calculated over 33 data pairs), or (iii) Class 3 OPX hits (Pearson coefficient: -0.1127;  
345 Spearman coefficient: -0.1242; calculated over 53 data pairs).

# FIGURE 4

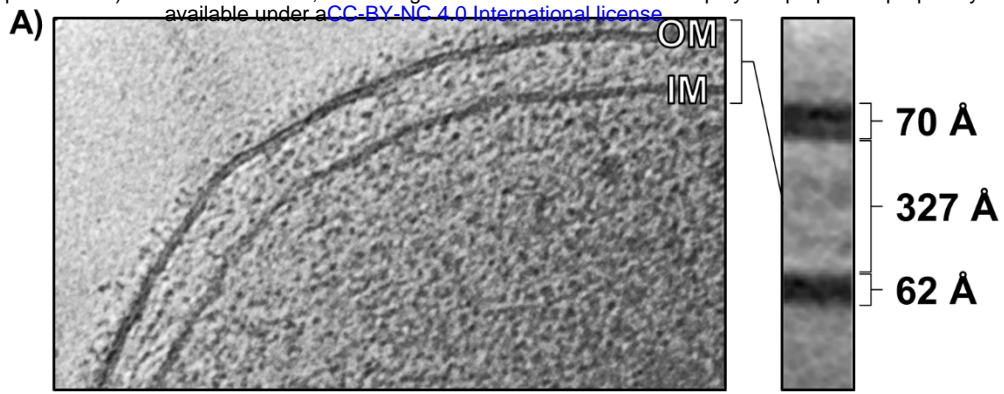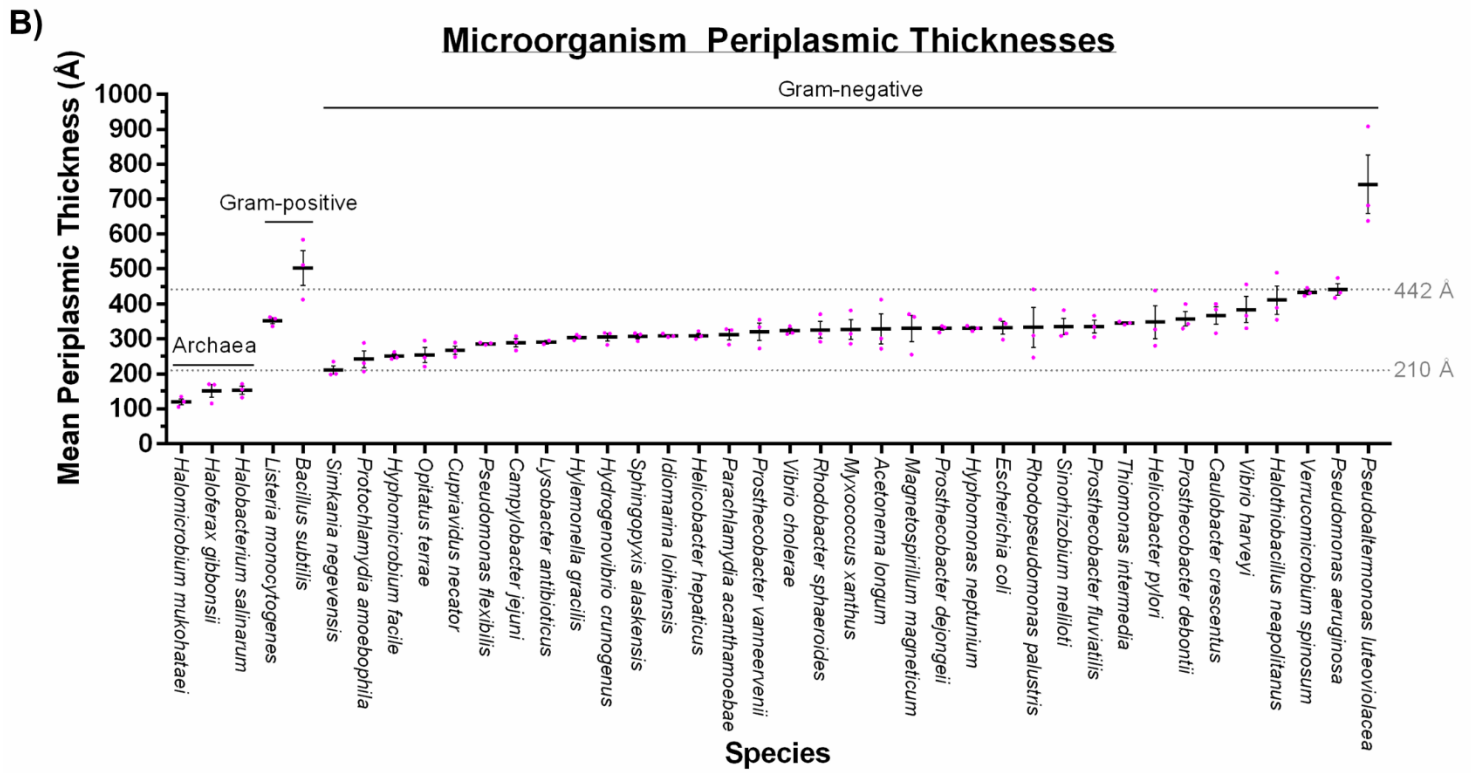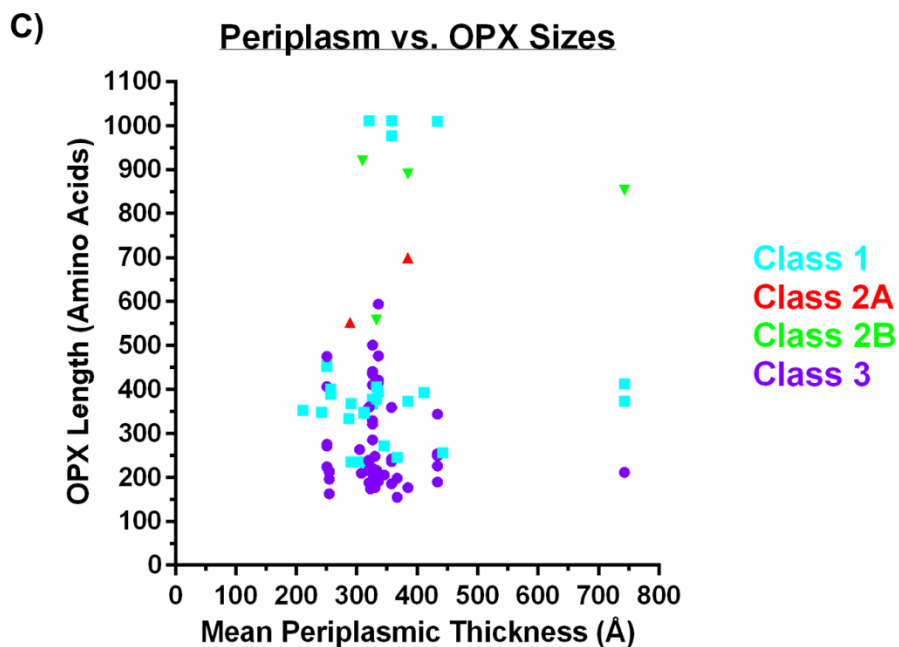

347 ***OPX protein lengths and classes in Gram-negative bacteria are not linked to periplasmic distance***

348 In *E. coli*, the integral OM Class 1 Wza<sub>Ec</sub> OPX protein is proposed to form a complex with  
349 the integral IM Wzc PCP protein that creates a contiguous periplasm-spanning channel for polymer  
350 export (Collins *et al.*, 2007) (**Fig. 1A**). To gain an understanding of the relationship between the  
351 subcellular architecture of *M. xanthus* and the role of the WzaX, WzaS, and WzaB Class 3 OPX  
352 proteins, we therefore compared the sizes of various cellular compartments and structures from cryo-  
353 electron tomography projections of the *M. xanthus* envelope. This revealed the *M. xanthus* OM to  
354 have an average thickness of  $69.8 \pm 1.8$  Å, compared to the average thickness of  $62 \pm 1.6$  Å for its  
355 IM, with a mean inter-membrane periplasmic thickness of  $327 \pm 28.4$  Å (**Fig. 4A**).

356 Given the enrichment of Class 1 OPX proteins in certain bacterial genera and different  
357 median OPX sizes for each OPX protein class (**Supplementary Table S4**), we examined whether  
358 the specific size of an OPX protein identified in a given bacterium was associated with the thickness  
359 of the periplasm in that organism. We first measured the distance between the IM and OM at lateral  
360 positions in cryo-electron tomography projections of cells from an additional 34 species of Gram-  
361 negative bacteria. For reference, we also analyzed IM–peptidoglycan and IM–S-layer thickness in  
362 several Gram-positive bacteria and Archaea (respectively) (**Fig. 4B**). This analysis revealed a range  
363 of Gram-negative periplasmic thicknesses confined between the lower and upper thresholds of 210  
364 and 442 Å (respectively), with the lone exception being *Campylobacter jejuni*, displaying a mean  
365 periplasmic thickness of 743 Å (**Fig. 4B**). For any of these species in which OPX proteins were  
366 herein identified (**Supplementary Tables S1, S2, S3**), we next compared the average measured  
367 periplasmic thickness with the length of the OPX protein(s) in each system. However, no overall  
368 correlation between the two variables was detected across all OPX proteins in this analysis, nor  
369 specifically within Class 1 or Class 3 OPX hits (**Fig. 4C**).

### 370 *WzaX, WzaS, and WzaB are genomically paired with 18-stranded $\beta$ -barrel proteins*

371           Given the lack of identifiable OM-spanning domains in WzaX/S/B (**Fig. 1B**), we sought to  
372 identify candidate proteins that could permit export of synthesized EPS, MASC, and BPS polymers  
373 across the *M. xanthus* OM. Through our previous analyses of the EPS, MASC, and BPS biosynthesis  
374 clusters, we demonstrated that WzaX (MXAN\_7417), WzaS (MXAN\_3225), and WzaB  
375 (MXAN\_1916) were encoded immediately adjacent to MXAN\_7418, MXAN\_3226, and  
376 MXAN\_1916 (respectively), with this synteny conserved for the majority (115/162, ~71%) of Class  
377 3 OPX proteins in myxobacterial genomes (Islam *et al.*, 2020), supporting the notion that the latter  
378 three proteins are important for each respective polymer synthesis pathway. To analyze the specific  
379 structural potential for each protein, MXAN\_7418, 3226, and 1916 were first subjected to  
380 evolutionary coupling analysis, revealing the predicted presence of 18 principal  $\beta$ -strands for  
381 MXAN\_7418, MXAN\_3226, and MXAN\_1916 (**Supplementary Figs. 2A,3A,4A**).

382           Fold-recognition analyses revealed structural homology of the C-terminal 76-86% of  
383 MXAN\_7418/3226/1916 to the complete C-terminal integral OM  $\beta$ -barrel module (residues 513-807)  
384 of PgaA (PgaA $_{\beta\beta}$ , PDB: 4Y25) (Wang *et al.*, 2016), at 98.9%, 99.4%, and 99.2% probability  
385 (respectively). PgaA is the OM porin responsible for secretion of PNAG polymer (which is heavily  
386 implicated in biofilm integrity) in Gram-negative bacteria; it contains multiple periplasmic  
387 tetratricopeptide repeats at its N-terminus, followed by a 16-stranded integral OM  $\beta$ -barrel domain  
388 closed by four extracellular loops (Wang *et al.*, 2016). Intriguingly, PNAG is produced by a  
389 synthase-dependent pathway (Whitney & Howell, 2013). In each of MXAN\_7418/3226/1916, the  
390 PgaA $_{\beta\beta}$ -like module is extended by two integral OM  $\beta$ -strands at the N-terminus of each protein,  
391 suggesting that MXAN\_7418, 3226, and 1916 do indeed have the propensity to form 18-stranded  $\beta$ -  
392 barrels (**Supplementary Figs. 2B,3B,4B**).

393           For the 162 Class 3 OPX proteins identified across 61 myxobacterial genomes (with  
394 Poly\_export—SLBB $_{1-2}$  architecture), most (115/162, ~71%) were found to be encoded near an  
395 extended PgaA $_{\beta\beta}$ -like protein, whereas the 26 Class 1 (with Poly\_export—SLBB $_{1-2}$ —Wza\_C  
396 organization) and two Class 2 OPX proteins were not encoded near any such  $\beta$ -barrel protein  
397 (**Supplementary Table S1**). We again expanded our analysis beyond *M. xanthus* to determine  
398 whether the presence of a  $\beta$ -barrel porin was a common occurrence in pathways containing an OPX  
399 protein. Intriguingly in *E. coli*, the *gfcABCDE-etp-etk* cluster needed for Wzx/Wzy-dependent Group

400 4 CPS production, encodes the OPX protein GfcE (formerly YccZ/Wza<sub>22min</sub>) as well as the protein  
401 GfcD (formerly YmcA) (Peleg *et al.*, 2005). The separate *yjbEFGH* (paralogous to *gfcABCD*)  
402 operon implicated in polysaccharide secretion encodes the GfcD-like protein YjbH (Ferrières *et al.*,  
403 2007). Both GfcD and YjbH are  $\beta$ -barrel proteins, which were recently identified to be part of a  
404 novel class of OM proteins (lacking published structures) with two separate  $\beta$ -barrels predicted to be  
405 formed by the same polypeptide chain (Solan *et al.*, 2021). Herein, fold-recognition analysis  
406 revealed the N-terminal halves to be matches to the  $\beta$ -barrel amyloid transporter FapF from  
407 *Pseudomonas*, whereas the C-terminal halves (GfcD<sub>Cter $\beta$ b</sub> and YjbH<sub>Cter $\beta$ b</sub>, respectively) possessed  
408 structural homology to the PNAG PgaA <sub>$\beta$ b</sub> module described above (**Supplementary Fig. 5A**).  
409 This double-barrel arrangement was supported by AlphaFold2-generated deep-learning structure  
410 models for both full-length GfcD and YjbH (**Supplementary Fig. 5B**), with the larger barrel  
411 portions displaying considerable sequence homology to PgaA <sub>$\beta$ b</sub> (**Supplementary Fig. 5C**).

412 To probe for the presence of similar  $\beta$ -barrels encoded near other OPX proteins, we used  
413 sequence homology searches (BLAST and HMMER) to examine the genomic context (up to 10  
414 genes upstream and downstream) of the various OPX proteins we identified in the REP dataset,  
415 beginning with the  $\beta$ -barrel sequences of MXAN\_7418, MXAN\_3226, and MXAN\_1916. Given the  
416 homology of the above proteins to PgaA, we added the PgaA <sub>$\beta$ b</sub>, GfcD<sub>Cter $\beta$ b</sub>, and YjbH<sub>Cter $\beta$ b</sub> sequences  
417 as well. In addition, the  $\beta$ -barrel sequences of BcsC (BcsC <sub>$\beta$ b</sub>, from PDB: 6TZK) (Acheson *et al.*,  
418 2019) and AlgE (from PDB: 4AFK) (Tan *et al.*, 2014) were also included, given their porin functions  
419 in the synthase-dependent cellulose and alginate production pathways, respectively (Whitney &  
420 Howell, 2013). Finally, we also included the sequence of Wzi (PDB: 2YNK) lacking the plug  
421 domain (Wzi <sub>$\beta$ b</sub>), as this is an 18-stranded  $\beta$ -barrel known to be linked with polysaccharide  
422 biosynthesis clusters (Bushell *et al.*, 2013).

423 Altogether, this analysis detected 365  $\beta$ -barrel query homologues encoded near 344 OPX  
424 proteins of all three classes (**Table 1**). Of the 156 matches to the Wzi <sub>$\beta$ b</sub> query, 128 were of  
425 comparable size and conserved alignment to full-length Wzi (including the  $\alpha$ -helical plug domain),  
426 consistent with these hits not being likely porin candidates. However, 28 homologues were a match  
427 to only Wzi <sub>$\beta$ b</sub> (i.e. no plug domain), reinforcing their candidacies as trans-OM export  $\beta$ -barrels;  
428 intriguingly, HHpred analysis of these 28 hits also revealed many with strong similarity to DUF6029,  
429 ascribing a potential polysaccharide secretion role to this heretofore uncharacterized protein domain.  
430 The PgaA <sub>$\beta$ b</sub> query detected 12 homologues, 2 of which were uniquely-matched to only the  $\beta$ -barrel

431 domain, whereas the remaining 10 aligned with full-length PgaA, consistent with these latter hits  
432 possessing the numerous N-terminal TPR domains as well as the C-terminal PgaA<sub>βb</sub> porin domain.  
433 These results were similar for BcsC<sub>βb</sub>, i.e. that of the 5 homologues detected near OPX proteins, each  
434 was a match to full-length BcsC indicating a conservation of N-terminal TPR and C-terminal porin  
435 domains (with no matches confined to BcsC<sub>βb</sub> detected). Fifteen homologues to synthase-dependent  
436 pathway AlgE were also detected. Profile matches to GfcD<sub>Cterβb</sub> and YjbH<sub>Cterβb</sub> queries (68 and 84,  
437 respectively) were largely matched via length and conserved alignment to full-length GfcD and  
438 YjbH, suggesting that these homologues contain the N-terminal FapF-like β-barrel domain as well as  
439 the C-terminal PgaA<sub>βb</sub>-like polymer-secretion domains; only two GfcD<sub>Cterβb</sub> and three YjbH<sub>Cterβb</sub> hits  
440 were identified with homology to only the C-terminal barrels of each protein. However, the  
441 GfcD<sub>Cterβb</sub> homologue detected in *Aquifex aeolicus* (WP\_164930611.1), as well as the hits to  
442 YjbH<sub>Cterβb</sub> detected in *A. aeolicus* (WP\_010880290.1) and *Sulfitobacter pseudonitzschiae*  
443 (WP\_174861591.1), were only matched to the respective polysaccharide-secretion modules,  
444 indicating the potential for stand-alone export of sugar chains in these systems. Finally, homologues  
445 to MXAN\_7418, MXAN\_3226, and MXAN\_1916 were only found to be encoded in myxobacterial  
446 genomes. Importantly, the presence of these extended PgaA<sub>βb</sub>-like 18-stranded β-barrels in  
447 myxobacteria was linked to nearby Class 3 OPX proteins. However, unlike OPX hits from the  
448 MYXO database, only 77/2017 Class 3 OPX proteins from the REP dataset were identified to be  
449 encoded near MXAN\_7418/3226/1916/ PgaA<sub>βb</sub>/GfcD<sub>Cterβb</sub>/YjbH<sub>Cterβb</sub>/BcsC<sub>βb</sub>/AlgE/Wzi<sub>βb</sub> stand-alone  
450 porin homologues.

451 Together, these data reveal intriguing architectural similarities between β-barrel porin  
452 modules from synthase-dependent polymer export pathways and those implicated in myxobacterial  
453 Wzx/Wzy-dependent secretion, as well as analogous or ABC transporter-dependent pathways in  
454 diverse bacteria, all previously unreported associations.



455 **Figure 5. OPX-companion  $\beta$ -barrel structures. A)** Tertiary structure models (top and front views)  
456 for MXAN\_7418, MXAN\_3226, and MXAN\_1916, as generated using deep learning via AlphaFold2,  
457 as well as the PgaA C-terminal domain (aa 513–807) X-ray crystal structure (PDB: 4Y25) (Wang *et*  
458 *al.*, 2016). Structures are coloured with a spectrum, from the N-terminus (*blue*) to the C-terminus  
459 (*red*), and depicted with smooth loops. **B)** Front and back views of the interior spaces of the  $\beta$ -  
460 barrels depicted in Panel A overlaid with the electrostatic character of the residues contacting the  
461 luminal volume, as generated via HOLLOW (Ho & Gruswitz, 2008). Surfaces have been colored  
462 according to charge, from blue (positive, +5 kT/e) to white (uncharged/hydrophobic), to red  
463 (negative, -5 kT/e). **C)** Trypan Blue dye-binding for *M. xanthus* DZ2 WT (n = 6),  $\Delta pilA$  (n = 4),  
464  $\Delta wzaX$  (n = 3), and  $\Delta mxan\_7418$  (i.e.  $\Delta wzpX$ , n = 4) to probe cell-surface EPS levels. Mean values  
465 are indicated (+/- SEM), with each biological replicate data point indicated. Means of all mutants  
466 were significantly lower than WT, while that of  $\Delta mxan\_7418$  was significantly higher than either  
467  $\Delta pilA$  or  $\Delta wzaX$ , as calculated via Student's T-test ( $p < 0.05$ ). **D)** T4P-dependent swarm expansion  
468 of strains tested in Panel C. Scale bar: 4 mm. **E)** Auto-aggregation profiles of strains tested in Panel  
469 C for cells resuspended in CYE rich medium at an initial OD<sub>600</sub> of 1.0. Mean values (n = 3) are  
470 indicated +/- SEM. Open plot points: no statistically significant difference in mean relative to  $\Delta wzaX$   
471 at a given time point. Closed plot points: statistically significant difference of means relative to  
472  $\Delta wzaX$  at a given time point. Significance was evaluated via Student's T-test ( $p \leq 0.05$ ).

## FIGURE 5

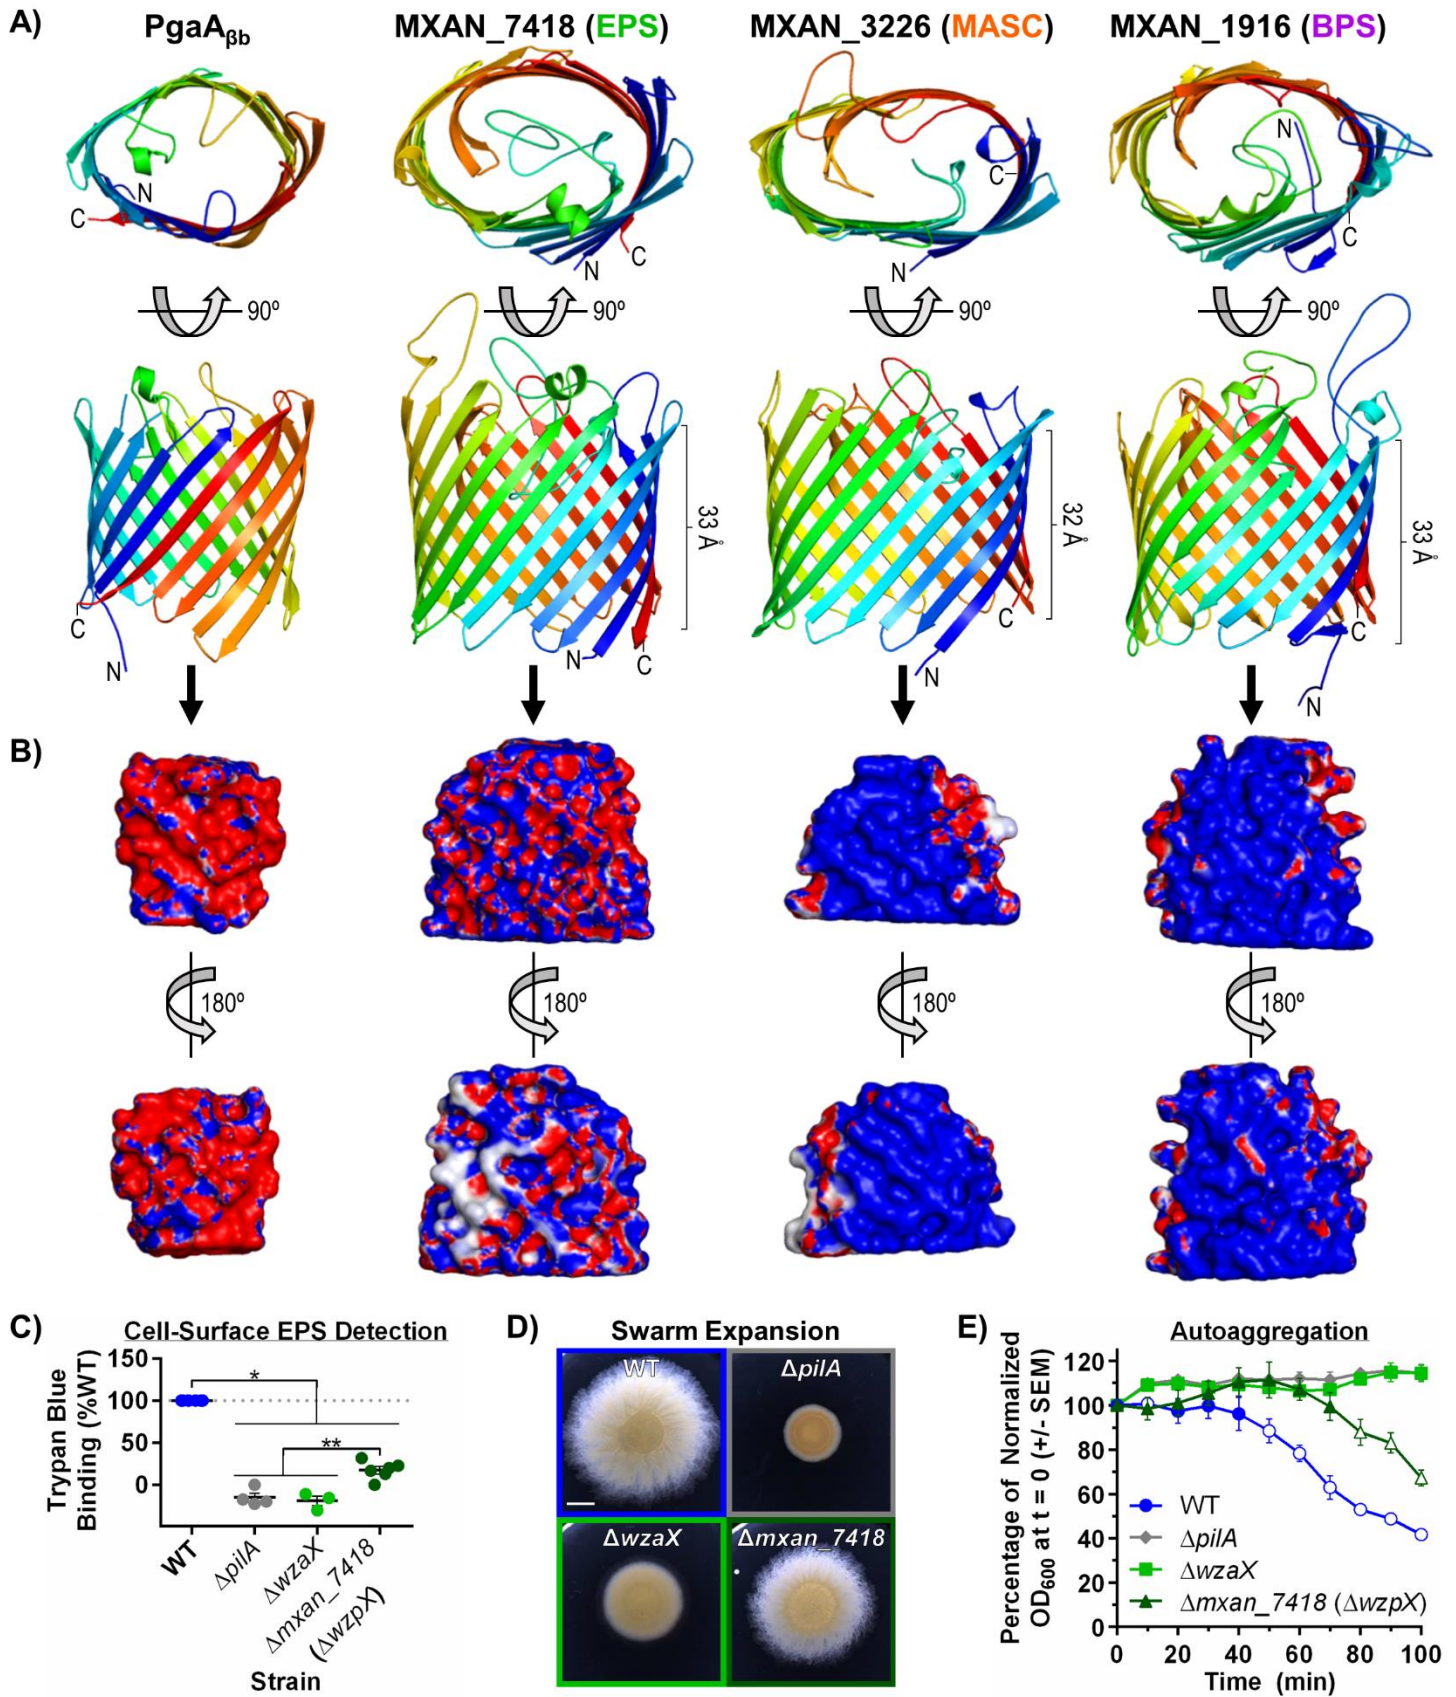

474 *WzpX, WzpS, and WzpB are (respectively) integral OM  $\beta$ -barrel EPS-, MASC-, and BPS-pathway*  
475 *porins*

476 To examine the structural suitability of the WzaX/S/B co-occurring  $\beta$ -barrels for the  
477 respective translocation of EPS/MASC/BPS, and since no full-length template structure could be  
478 identified, we employed the deep-learning approach provided by AlphaFold2 to generate a tertiary  
479 structure model. AlphaFold2 employs information from evolutionarily-coupled amino acids as well  
480 as templates with structural homology to fold a polypeptide sequence using an iterative process  
481 (Jumper *et al.*, 2021). Consistent with the above-described data (**Supplementary Figs. 2,3,4**),  
482 MXAN\_7418, 3226, and 1916 were all predicted to form 18-stranded  $\beta$ -barrels with sizeable central  
483 cavities, with respective barrel heights of 33, 32, and 33 Å (**Fig. 5A**). As molecular dynamics  
484 simulations typically calculate the hydrophobic thickness of asymmetric OM bilayers to be ~40% of  
485 their total solvated thickness (Pavlova *et al.*, 2016), based on our measured *M. xanthus* OM thickness  
486 of  $69.8 \pm 1.8$  Å (**Fig. 4A**), an approximated hydrophobic thickness of ~28 Å would indeed be  
487 traversable by the proposed MXAN\_7418, MXAN\_3226, and MXAN\_1916 tertiary structures.

488 We subsequently used HOLLOW to probe the luminal volume of the EPS/MASC/BPS-  
489 cluster  $\beta$ -barrels via filling of the internal space with dummy atoms to generate a cast of the void  
490 space, after which the electrostatic potential of the contacting  $\beta$ -barrel surface was overlaid. To  
491 validate this approach, we first probed the internal electrostatics of the PgaA $_{\beta b}$  template structure,  
492 revealing a highly anionic interior (**Fig. 5B**), consistent with passage of the cationic PNAG polymer  
493 through the lumen of the barrel. BPS was previously discovered to be a randomly-acetylated anionic  
494 repeating tetrasaccharide, with the distal three sugars of each repeat constituted by  
495 mannosaminuronic acid (ManNAcA) units (Islam *et al.*, 2020). Therefore, the cationic charge  
496 character of the MXAN\_1916 lumen (**Fig. 5B**) is indeed suitable for passage of its associated HMW  
497 BPS polymer. While the chemical structures or exact compositions of MASC or EPS are not known,  
498 isolated spore coat material was found to contain GalNAc chains with potential glucose (Glc) and  
499 glycine decorations (Holkenbrink *et al.*, 2014). As the interior of the MXAN\_3226  $\beta$ -barrel is  
500 cationic (**Fig. 5B**), this suggests that MASC may have a net-anionic charge character, as contributed  
501 via as-yet-unidentified sugars and/or chemical modifications. EPS composition has been probed  
502 across four investigations (Islam *et al.*, 2020, Behmlander & Dworkin, 1994, Gibiansky *et al.*, 2013,  
503 Sutherland & Thomson, 1975), with Ara, Gal, GalNAc, Glc, GlcN, GlcNAc, Man, ManNAc, Rha,  
504 and Xyl having been identified (depending on the publication); however, none of these sugars are

505 highly charged, which is consistent with the more neutral character of the MXAN\_7418 interior  
506 (compared to that of either MXAN\_1916 or MXAN\_3226) (**Fig. 5B**).

507 To probe the implication of Wzx/Wzy-dependent pathway-associated  $\beta$ -barrels in polymer  
508 secretion, we next set out to better understand their physiological contexts. RNAseq analysis  
509 previously detected the transcripts encoding MXAN\_7418 and MXAN\_1916 in vegetative cells, as  
510 well as MXAN\_3226 in developmental cells, indicating that all three  $\beta$ -barrels are indeed expressed  
511 over the course of the *M. xanthus* lifecycle (Muñoz-Dorado *et al.*, 2019, Sharma *et al.*, 2021).  
512 Furthermore, MXAN\_1916 was detected in proteomic screens of biotinylated surface-exposed  
513 proteins, and MXAN\_1916 and MXAN\_3226 were both detected in OMV samples from vegetative  
514 cells (Kahnt *et al.*, 2010). Importantly, the MXAN\_3226  $\beta$ -barrel was already shown to be an  
515 essential part of the MASC pathway as its respective *M. xanthus* deletion-mutant strain was found to  
516 be deficient in sporulation and MASC production (Holkenbrink *et al.*, 2014). To examine effects of  
517  $\beta$ -barrel deletion on EPS levels in vegetative cells, we first generated a  $\Delta mxan\_7418$  chromosomal  
518 deletion mutant strain. Since retention of Trypan Blue has become a well-established indicator for  
519 the presence of EPS on the surface of *M. xanthus* cells, we next compared the dye-binding capacity  
520 of  $\Delta mxan\_7418$  cells versus EPS-pathway OPX<sup>-</sup> ( $\Delta wzaX$ ) and T4P<sup>-</sup> ( $\Delta pilA$ ) cells, both known to be  
521 defective in EPS production. Relative to WT cells, absence of the EPS-pathway  $\beta$ -barrel resulted in  
522 an 83% loss of Trypan Blue retention by  $\Delta mxan\_7418$  cells (**Fig. 5C**), indicating a severe reduction  
523 in the amount of cell-surface EPS in the  $\beta$ -barrel mutant, consistent with cell-surface EPS  
524 deficiencies previously probed in  $\Delta wzxX$ ,  $\Delta wzyX$ ,  $\Delta wzcX$ ,  $\Delta wzeX$ , and  $\Delta wzaX$  EPS-pathway mutants  
525 (Islam *et al.*, 2020).

526 Compared to the baseline readings in the  $\Delta wzaX$  EPS-pathway OPX<sup>-</sup> mutant strain,  
527  $\Delta mxan\_7418$  cells displayed marginally higher levels of Trypan Blue binding (**Fig. 5C**). These  
528 results are consistent with EPS-pathway  $\beta$ -barrel deficiency principally impacting polymer export to  
529 the cell surface, as opposed to both polymer assembly and export being compromised in the absence  
530 of EPS-pathway OPX proteins. To probe whether residual quantities of EPS were indeed present on  
531 the surface of  $\Delta mxan\_7418$  cells, we compared swarm expansion on solid medium as well as auto-  
532 aggregation in liquid medium; though both phenotypes are multifactorial, each requires T4P  
533 engagement with cell-surface EPS. Relative to WT,  $\Delta mxan\_7418$  swarm expansion was reduced,  
534 with this phenotype even more pronounced in  $\Delta wzaX$  swarms (**Fig. 5D**). Similarly for auto-  
535 aggregation testing in rich medium, consistent with previous findings, WT cells steadily clumped

536 together and sedimented in the cuvette, whereas both  $\Delta pilA$  and  $\Delta wzaX$  cells did not (**Fig. 5E**). Cells  
537 of the  $\Delta mxan_{7418}$  mutant remained in suspension analogous to  $\Delta wzaX$  cells for ~75% of the assay,  
538 after which they began to slowly sediment (**Fig. 5E**), suggesting that cell-surface EPS had eventually  
539 accumulated to a sufficient threshold to support T4P-mediated clumping in liquid. Taken together,  
540 these data indicate that while minimal amounts of EPS can reach the cell surface through as-yet-  
541 undetermined means (see Discussion for further comment), MXAN\_7418 serves as the principal  
542 trans-OM conduit for EPS export in *M. xanthus*.

543           Ultimately, the findings detailed in this investigation support a model for polysaccharide  
544 export in Wzx/Wzy-dependent pathways lacking an integral OM OPX protein — as represented by  
545 the independent EPS, BPS and MASC pathways in *M. xanthus* — in which the final polymer must  
546 pass through an integral OM  $\beta$ -barrel porin for efficient secretion to the cell exterior. For these  
547 reasons, as well as the long-established naming convention for Wzx/Wzy-dependent pathways in  
548 bacteria (Reeves *et al.*, 1996), we propose the designation Wzp (i.e. Wz porin) for the newly-  
549 identified component of these secretion systems (**Fig. 6**).

550 **Figure 6. Wzx/Wzy-dependent polysaccharide assembly-and-secretion pathways in *M.***  
551 ***xanthus*.** In these schematics, the WzaX/S/B proteins have been depicted in a linking capacity  
552 between the apex of the WzcX/S/B PCP periplasmic domains and the periplasmic opening of the  
553 integral OM WzpX/S/B  $\beta$ -barrel porins identified herein. However, (i) the exposure of the  
554 EPS/MASC/BPS polymers to the periplasmic space as each transits between the IM and OM  
555 components of each system, and (ii) the exact role(s) of the WzaX/S/B proteins in *M. xanthus*  
556 polymer translocation (Supplementary Fig. S6), remain open questions for each pathway. To  
557 denote these uncertainties, this stage of the transport cycle has been marked with an asterisk (\*).

## FIGURE 6

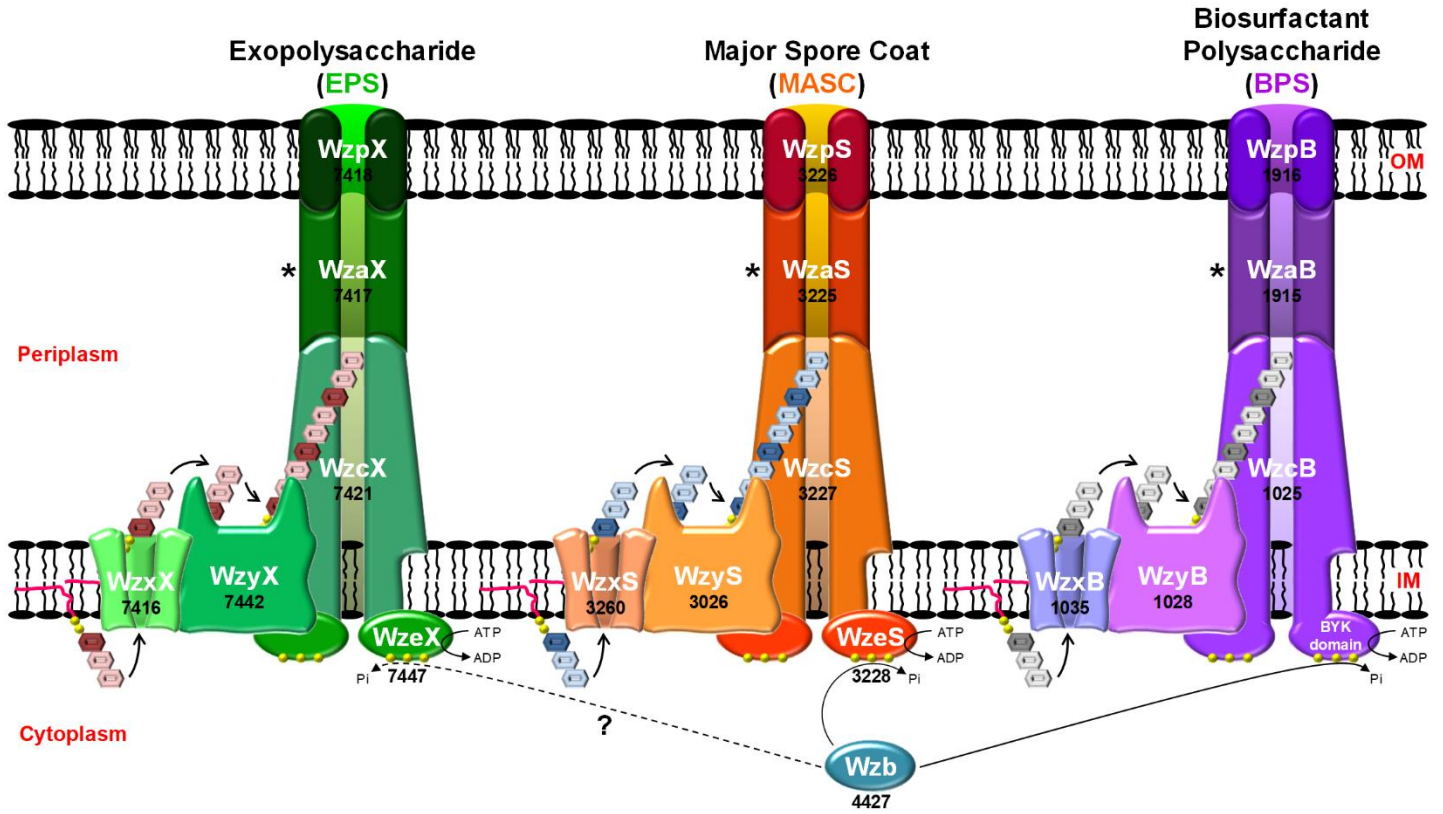

## 559 DISCUSSION

560 Knowledge of the terminal component through which secreted polysaccharides exit a  
561 bacterial cell is crucial for the development of targeted antimicrobial agents that could be used to  
562 inhibit this process (Kong *et al.*, 2013). From the data presented herein, we have provided evidence  
563 that bacterial OPX proteins fall into one of three distinct structural classes, the first two of which  
564 have either the demonstrated (Class 1) or predicted (Class 2) capacity to span the OM, whereas the  
565 third (Class 3) is missing any such domains. Instead, as demonstrated by the Class 3 OPX WzaX/S/B  
566 proteins from *M. xanthus*, these Wzx/Wzy-dependent pathway proteins are genomically and  
567 functionally paired with a complementary integral OM-spanning  $\beta$ -barrel porin similar to that  
568 required for PNAG export in synthase-dependent pathways.

569 The Class 1 OPX protein Wza<sub>Ec</sub> is the most extensively-characterized OPX protein with  
570 respect to structure–function relationships. The orientation of Wza<sub>Ec</sub> in the OM was established  
571 through introduction of a FLAG tag on the Wza<sub>Ec</sub> C-terminus, allowing for a FLAG epitope to be  
572 detected on the cell surface with  $\alpha$ -FLAG antibodies (Dong *et al.*, 2006). Similar introduction of a C-  
573 terminal His<sub>6</sub> epitope tag resulted in a partially functional Wza<sub>Ec</sub>-His<sub>6</sub> construct that was able to  
574 restore K30 Group 1 CPS biosynthesis to ~20% of the level restored by an untagged Wza<sub>Ec</sub> construct  
575 following expression *in trans* (Nesper *et al.*, 2003). Various C-terminal  $\alpha$ -helix truncations also  
576 abolished Wza<sub>Ec</sub> function (Ford *et al.*, 2009). This indicates that the OM-spanning domain of Wza<sub>Ec</sub>  
577 can be functionally-sensitive to structural perturbation. In lipid bilayers, purified Wza<sub>Ec</sub>-His<sub>6</sub> was  
578 able to form 2D octameric ring-like crystal arrays (Beis *et al.*, 2004), suggestive of channel  
579 formation, with this arrangement confirmed by the 3D X-ray crystal structure (Dong *et al.*, 2006).  
580 Through introduction of the photo-crosslinkable synthetic amino acid *p*-benzoyl-L-phenylalanine  
581 (*p*Bpa) at various sites in Wza<sub>Ec</sub>, Nickerson and colleagues elegantly demonstrated that K30 CPS  
582 polymers could be trapped in the lumen of the translocon (Nickerson *et al.*, 2014), confirming that  
583 polysaccharides do indeed pass through Wza<sub>Ec</sub> during secretion. Specifically, substitutions at certain  
584 sites within periplasmic D2 (**Fig. 1A**) were able to maintain translocon functionality as well as form  
585 crosslinks with polymers. Site-specific *p*Bpa substitutions within periplasmic D1 rendered Wza<sub>Ec</sub>  
586 non-functional. Conversely, *p*Bpa-substituted positions in periplasmic D3, and more importantly at  
587 the kink in the OM-traversing  $\alpha$ -helical D4, maintained Wza<sub>Ec</sub> functionality, but were unable to form  
588 detectable intermolecular crosslinks upon UV exposure (Nickerson *et al.*, 2014). As such, the transit  
589 of secreted polymer through the  $\alpha$ -helical D4 Wza<sub>C</sub> domain pore could not be demonstrated via this



590 technique. However, purified Wza<sub>Ec</sub> was shown to stably insert into planar lipid bilayers and form  
591 electro-conductive channels, with site-specific amino acids substitutions confirming that ion flow  
592 does indeed proceed via the D4 pore formed by the OM-spanning  $\alpha$ -helix (Kong *et al.*, 2013).  
593 Synthetic peptides corresponding to the native Wza<sub>Ec</sub> D4  $\alpha$ -helix sequence were also able to  
594 spontaneously insert into such bilayers, but formed unstable pores; however, modification of the  
595 native D4 sequence through consensus generation (based on 94 closely-related sequences) yielded an  
596 optimized peptide (**Fig. 2B**) that could spontaneously insert into bilayers and form stable pores  
597 (Mahendran *et al.*, 2017). Given the primary structure diversity amongst OM-spanning  $\alpha$ -helices  
598 uncovered herein for both Class 1 and Class 2B OPX proteins (**Fig. 2B,C**), additional optimization  
599 of synthetic peptide sequences should be possible to further improve spontaneous membrane  
600 insertion, self-assembly, and  $\alpha$ -barrel pore stability.

601 The Class 2B OPX protein KpsD<sub>Ec</sub> has long been known to be essential for Group 2 CPS  
602 export. When expressed in isolation, KpsD<sub>Ec</sub> was shown to reside in the periplasm (Silver *et al.*,  
603 1987). However, upon expression of KpsD<sub>Ec</sub> along with its cognate IM-localized PCP KpsE (which  
604 extends into the periplasm), KpsD<sub>Ec</sub> was also detected in IM and OM fractions of lysed cells  
605 (Arrecubieta *et al.*, 2001). Intriguingly, OM-localized KpsD<sub>Ec</sub> is detected as a multimer, whereas the  
606 minimally-detected IM-localized KpsD<sub>Ec</sub> is present as a monomer, consistent with the adoption of  
607 quaternary structure by KpsD<sub>Ec</sub> at the site of polysaccharide egress from the cell (Sande *et al.*, 2019).  
608 Furthermore, immunolabelling of intact *E. coli* cells using  $\alpha$ -KpsD<sub>Ec</sub> antiserum resulted in the  
609 detection of KpsD<sub>Ec</sub> epitopes at the cell surface (McNulty *et al.*, 2006), suggesting that a portion of  
610 KpsD<sub>Ec</sub> was indeed surface-accessible. The detection herein of structural homology of the extreme  
611 KpsD<sub>Ec</sub> C-terminus to the OM-spanning domain of Wza<sub>Ec</sub> further supports the contention that a part  
612 of KpsD<sub>Ec</sub> is able to interact with, and span, the OM bilayer, albeit in a conditional manner. The 24-  
613 residue length of the KpsD<sub>Ec</sub> C-terminal  $\alpha$ -helix is well within the threshold of 20 amino acids  
614 required to span the hydrophobic core of a membrane bilayer for  $\alpha$ -helical integral membrane  
615 domains (Baeza-Delgado *et al.*, 2013). Analogous to Wza<sub>Ec</sub>, truncation of the KpsD<sub>Ec</sub> C-terminus by  
616 11 amino acids abrogated protein function (Wunder *et al.*, 1994). A potential OM-spanning  $\alpha$ -helix  
617 is indeed a conserved property of the Class 2B OPX proteins identified in this study. Despite the  
618 detectability of KpsD<sub>Ec</sub> at the cell surface with  $\alpha$ -KpsD<sub>Ec</sub> antibodies,  $\alpha$ -His-tag antibodies were  
619 unable to label the surface of cells expressing a KpsD<sub>Ec</sub> variant encoding a C-terminal His<sub>6</sub> affinity  
620 tag (McNulty *et al.*, 2006); in this instance, the highly-cationic nature of the affinity tag may have  
621 impeded its translocation across the hydrophobic OM bilayer, thus inhibiting immunodetection.

622 Given that KpsD<sub>Ec</sub> by itself does not intrinsically associate with the OM (Silver *et al.*, 1987), this  
623 may suggest that the protein can become directly inserted into the OM (as opposed to requiring OM  
624 insertion via the Bam/Tam or Lol machinery). In this manner, KpsD<sub>Ec</sub> could indeed function as the  
625 terminal piece of the Group 2 capsule secretion machinery.

626 Historically, Group 2 CPS secretion across the OM had been suggested to implicate integral  
627 OM  $\beta$ -barrel porins (Whitfield & Valvano, 1993, Bliss & Silver, 1996), however such a model has  
628 fallen out of favour given that no such  $\beta$ -barrels have ever been detected in or near related Kps  
629 synthesis clusters. This would be consistent with an ability of KpsD<sub>Ec</sub>-like Class 2B OPX proteins to  
630 traverse the OM, thus not requiring any downstream piece of export machinery in certain organisms.  
631 However, this scenario may not be absolute, as numerous instances of  $\beta$ -barrel proteins encoded near  
632 both Class 2A and Class 2B (as well as Class 1 and Class 3) OPX genes were uncovered herein,  
633 suggesting that integral OM porins may play an important role in non-synthase-dependent secretion  
634 in diverse organisms. Though not all Class 2 OPX proteins identified in our investigation were  
635 matched with a nearby  $\beta$ -barrel, our synteny analysis window was limited to  $\pm$  10 genes from each  
636 OPX gene and would thus not have captured candidate porins elsewhere in the genome. As a case-  
637 in-point, the *M. xanthus* EPS, MASC, and BPS clusters contain respective insertions of >18 kbp,  
638 >223 kbp, and > 1 Mbp that separate constituent members of the same cluster, which in the latter  
639 results in extraordinary genomic distance between *wzaB-wzpB* and the remainder of the BPS  
640 assembly genes (Islam *et al.*, 2020). Moreover, as our synteny analyses were limited to 9 query  
641 sequences (8 with similarity to PgaA <sub>$\beta$ b</sub>), this does not preclude the presence of other/more distantly-  
642 related  $\beta$ -barrels near “unmatched” OPX proteins. However, in the absence of specific templates  
643 with which to search, such an analysis was beyond the scope of the current investigation.

644 The identification of “OPX” proteins (an obvious misnomer) in Gram-positive bacteria, but  
645 specifically those of Class 3 architecture, point to a broadly-conserved periplasmic function for these  
646 proteins, likely through interfacing with the periplasmic domains of PCP proteins in most organisms.  
647 However, as dedicated peptidoglycan-spanning polysaccharide export channels have yet to be  
648 identified in Gram-positive bacteria, any role for Class 3 OPX proteins in these systems with regards  
649 to interactions with a secretion pore of some sort would be unfounded speculation. In *M. xanthus*  
650 cells, WzaX/S/B Class 3 OPX protein deficiency does not lead to visible accumulations of polymeric  
651 material in the periplasm (Saïdi *et al.*, 2021) suggesting that EPS/MASC/BPS polymer assembly via  
652 Wzx/Wzy-dependent pathways does not indiscriminately continue in these mutant backgrounds; this

653 is a similar observation to that for Wza<sub>Ec</sub> Class 1 OPX deficiency in *E. coli* cells (Nesper *et al.*,  
654 2003). Such material from ABC transporter-dependent synthesis does however accumulate in the  
655 periplasm of KpsD<sub>Ec</sub>-deficient Class 2B OPX-mutant cells (Wunder *et al.*, 1994, Bliss & Silver,  
656 1996).

657 For myxobacterial Class 3 OPX proteins, a clear partnership has now been demonstrated  
658 between these secretion-pathway components and integral OM  $\beta$ -barrel porins illustrating the  
659 requirement of the latter for HMW polysaccharide export across the OM. The WzpS (MXAN\_3226)  
660  $\beta$ -barrel was already shown to be essential for MASC secretion, but its function in the MASC  
661 transport cycle was not known at the time (Holkenbrink *et al.*, 2014). In the current investigation, we  
662 have shown that the properties of WzpB (MXAN\_1916) make it suitable for BPS translocation  
663 across the OM. Furthermore, we have herein demonstrated that WzpX (MXAN\_7418) functions as  
664 the principal export conduit for EPS across the OM to the cell surface. Intriguingly, EPS still appears  
665 to be assembled to a certain degree in mutant cells lacking WzpX (given the residual amount detected  
666 on the cell surface), as opposed to cells lacking WzaX which manifest an even more robust EPS<sup>-</sup>  
667 phenotype. This may indicate that while lack of the OPX component in the EPS pathway results in a  
668 severe reduction (or shutdown) of EPS production, in cells lacking WzpX, other  $\beta$ -barrel porins (e.g.  
669 WzpS and/or WzpB) may be able to inefficiently cross-complement the deficiency in the EPS-  
670 pathway machinery, resulting in residual EPS localization to the cell surface. Part of this inefficiency  
671 could arise from the cationic natures of the WzpS and WzpB barrel interiors not serving as suitable  
672 conduits for a more neutral EPS polymer.

673 The presence of a Wza\_C domain in a Class 1 or 2B OPX protein is not mutually exclusive to  
674 the presence of an integral OM  $\beta$ -barrel protein encoded nearby, considering that such barrels were  
675 found to be encoded near genes representing all three OPX protein classes across a range of bacterial  
676 genomes. The GfcD protein is particularly intriguing given the GfcE protein also encoded by the  
677 Group 4 CPS export locus (Peleg *et al.*, 2005). While GfcD contains a PgaA $\beta$ <sub>b</sub>-like polysaccharide  
678 secretion component with an attached SLBB-like domain (as part of the GfcD C-terminal module)  
679 (**Supplementary Fig. 5B**), GfcE is a functional Class 1 OPX paralogue of Wza<sub>Ec</sub>; this was  
680 evidenced by the ability of GfcE (formerly YccZ/Wza<sub>22min</sub>) expressed *in trans* to partially restore *E.*  
681 *coli* K30 CPS production in a mutant lacking Wza<sub>Ec</sub> (Drummel-Smith & Whitfield, 2000). GfcE  
682 possesses a complete Wza\_C domain, and as such would be expected to span the OM in a Wza<sub>Ec</sub>-like  
683 manner. One possibility could be that the Wza\_C domain of the GfcE OPX protein may be required

684 to properly interact/organize around the GfcD<sub>Cterβb</sub> polysaccharide secretion module. Furthermore,  
685 the presence of a putative FapF amyloid secretion β-barrel fused to the same polypeptide as that of a  
686 PgaA<sub>βb</sub>-like module typically associated with polysaccharide secretion raises an interesting  
687 possibility. Amyloid proteins are frequently secreted by bacteria in order to stabilize biofilm  
688 matrices composed largely of secreted polysaccharides (Erskine *et al.*, 2018). Thus, in Group 4  
689 capsules, secretion of amyloidogenic polypeptides (via the GfcD FapF-like N-terminal module) could  
690 help to stabilize the polysaccharide component of the capsule structure and/or anchor the CPS to the  
691 cell surface.

692

### 693 *Ideas and Speculation*

694 For Class 3 OPX proteins, the lack of OM-spanning domains and the (relatively) small size of  
695 these proteins (compared to other OPX classes), present a dilemma regarding the mechanism of  
696 transit across the periplasm for polymers produced by these systems (**Supplementary Fig. 6**). As  
697 a case-in-point, the thickness of the *M. xanthus* periplasm was measured to be 327 Å (**Fig. 4A,B**),  
698 while the periplasmic domain of the BPS-pathway WzcB PCP-2B protein was estimated to extend up  
699 to ~165 Å into the periplasmic space. Coupled with the maximum possible height of ~62 Å for one  
700 unit of OPX protein WzaB, together this only accounts for ~227 Å of periplasmic thickness, leaving  
701 ~100 Å of periplasmic height unaccounted for (**Supplementary Fig. 6**), compared to standard  
702 models of polysaccharide secretion (**Fig. 1A**). Furthermore, high-confidence co-evolving amino  
703 acids between WzcB and WzaB localize to the apex of the PCP and the base of the Poly\_export  
704 domain of the Class 3 OPX protein (respectively) (**Supplementary Fig. 6, Supplementary**  
705 **Table S5**), heavily implying the presence of a conserved interaction interface between the two  
706 proteins. With the assumption of pathway specificity for each *M. xanthus* Class 3 OPX protein — as  
707 evidenced by lack of cross-complementation in single-OPX-knockout strains (Islam *et al.*, 2020) —  
708 and using components of the BPS pathway as examples (**Fig. 6**), several potential models for trans-  
709 envelope transit can thus be proposed:

710 (i) Model 1: As the polymer exits the WzcB cavity in the periplasm (following WzyB-  
711 mediated polymerization), it passes through a periplasmic WzcB-associated single-layer WzaB  
712 oligomer. Once past this point, the polymer would have to independently locate its cognate integral  
713 OM WzpB β-barrel porin in order to reach the outside of the cell. This presumes the polymer is

714 exposed to the periplasm for a substantial portion of its trip between the IM and OM. In such a  
715 model, polymer export might still be possible in the absence of the cognate OPX (as long as this  
716 absence does not impact polymer assembly). However, since this is not the case in *M. xanthus*, it  
717 would argue against this model.

718 (ii) Model 2: This is a variation of Model 1 in which single-layer periplasmic oligomers of  
719 WzaB are located both on the apical point of the PCP octamer as well as the proximal face of the  
720 integral OM WzpB  $\beta$ -barrel porin. In this manner, *M. xanthus* OPX-mediated substrate specificity  
721 would exist at both ends of the transport process, but again the polymer could be exposed to the  
722 periplasm during stages of the transport cycle bridging the OPX proteins. Nonetheless, this model  
723 provides a solution to the question of “targeting” of the nascent polymer to the proper OM-spanning  
724 apparatus. However, this model also presumes a constant presence of Class 3 OPX proteins  
725 associated with the OM, as well as specific interactions between the periplasmic OPX WzaB and the  
726 integral OM porin WzpB. At the moment, this is not bolstered by high-confidence evolutionary  
727 couplings data between the two proteins (**Supplementary Table S5**), but this may be partially due  
728 to an insufficient number of barrel homologues with which to fully probe coevolution. However, as  
729 OPX proteins are not detected in surface-biotinylated or OMV samples from *M. xanthus*, supporting  
730 evidence for this concept is lacking.

731 (iii) Model 3: The periplasmic distance of 327 Å could be approximately accounted for by  
732 ~165 Å of WzcB PCP-2B periplasmic domain height, followed by OPX oligomers of WzaB stacked  
733 in duplicate ( $\sim 62 \text{ \AA} \times 2 = \sim 124 \text{ \AA}$ ) or triplicate ( $\sim 62 \text{ \AA} \times 3 = \sim 186 \text{ \AA}$ ), depending on the packing  
734 arrangement of the oligomers. Along with the PCP channel, such architecture could be envisaged to  
735 form a protected channel lumen spanning from the IM to the OM, precluding exposure of the  
736 polymer to the periplasm. This would also abrogate any “targeting” issues of the polymer to the  
737 WzpB  $\beta$ -barrel secretin. In this case, HMW oligomers of *M. xanthus* OPX proteins would be  
738 expected in the periplasm, which could possibly co-precipitate with IM and/or OM fractions. Once  
739 again, data to support this contention awaits further experimentation.

740 (iv) Model 4: As the nascent polymer emerges from the PCP-2B opening, the polymer  
741 interacts with copies of WzaB at the apex of the PCP-2B periplasmic domain, allowing WzaB to bind  
742 the polymer and detach from the PCP. As additional polymer elongation occurs, more units of WzaB  
743 are able to bind further down the polymer. In this manner, WzaB bound to the polymer would serve

744 as a type of targeting chaperone which preferentially directs the periplasmic polymer to its cognate  
745 WzpB  $\beta$ -barrel porin in the OM. Once a given WzaB has reached the porin, it would disengage from  
746 the polymer and be able to undergo subsequent rounds of binding in the periplasm to the nascent  
747 polymer. Such a mechanism would afford a certain degree of protection to the translocating polymer  
748 against the periplasmic environment, as well as provide a mechanism for targeting of the polymer to  
749 the specific  $\beta$ -barrel machinery needed for transport across the OM. This would also explain why the  
750 Class 3 OPX proteins WzaX, WzaS, and WzaB were not detected in screens of surface-biotinylated  
751 proteins or those identified in OMV fractions (from vegetative and developmental cells), i.e. that OM  
752 association of WzaX/S/B (via interaction with WzpX/WzpS/WzpB) is of a more transient nature.

753 Exposure of a sugar polymer to the periplasm as it transits between the IM and OM is a  
754 common occurrence in synthase-dependent systems such as those involved in alginate, cellulose, and  
755 PNAG assembly-and-export (Whitney & Howell, 2013). Recently, Group 2 CPS was also suggested  
756 to be exposed to the periplasm at some point during its secretion across the cell envelope (Liston *et*  
757 *al.*, 2018). In these systems, periplasmic enzymes are able to access the transiting polymer and  
758 introduce various modifications including sugar epimerization and/or (de)acetylation. Such a  
759 mechanism may be in place for the *M. xanthus* BPS polymer, for which the secreted form displays  
760 random acetylation (Islam *et al.*, 2020). In synthase-dependent pathways, TPR domains (either  
761 standalone or attached) extend into the periplasm from the  $\beta$ -barrel porin and are proposed to interact  
762 with these chain-modifying enzymes (Whitney & Howell, 2013). Of note, numerous OPX proteins  
763 were found to be encoded near  $\beta$ -barrel genes for full-length PgaA and BcsC homologues complete  
764 with the respective TPR architectures (**Table 1**). In these systems, questions arise as to the functional  
765 relationships between periplasmic OPX proteins and integral OM  $\beta$ -barrel porins with TPR domains  
766 potentially occluding access of the OPX protein to the periplasmic face of the porin.

767 Ultimately, this study reveals OPX-protein complexities in diverse organisms that differ from  
768 the well-studied Wza<sub>Ec</sub> protein, which will further our understanding of the mechanism of sugar  
769 polymer export in bacterial cells. Moreover, updated genomic, structural, and functional knowledge  
770 of the terminal step in the polysaccharide secretion pathway will enable researchers to selectively  
771 develop novel antimicrobial compounds targeted to blocking bacterial polymer secretion from the  
772 outside, thus bypassing any requirements for access to the cell interior to compromise the viability of  
773 a bacterial cell.

## 774 MATERIALS AND METHODS

### 775 *Protein structure analysis & modelling*

776 Given the high fold-recognition equivalence between WzaX/S/B and Wza<sub>Ec</sub>, the tertiary  
777 structure of each *M. xanthus* OPX protein was modelled against the Wza<sub>Ec</sub> template (PDB: 2J58)  
778 using MODELLER. For  $\beta$ -barrel proteins MXAN\_7418/3226/1918 that lacked a suitable full-length  
779 structural template, protein structure models were computed using deep learning and artificial  
780 intelligence via AlphaFold2 (Jumper *et al.*, 2021). Multiple sequence alignment entries were  
781 generated using 606, 251 and 101 unique sequences, respectively for MXAN\_1916, MXAN\_3226  
782 and MXAN\_7418, with the program run for 5 independent prediction models, leading to convergence  
783 after 3 recycling iterations. For proteins GfcD and YjbH, deposited AlphaFold2-generated structures  
784 were mined from the UniProt entries for P75882 and P32689, respectively. HOLLOW (Ho &  
785 Gruswitz, 2008) was used to generate internal volume casts of the MXAN\_7418/3226/1918  $\beta$ -  
786 barrels, followed by overlaying of the solvent-accessible electrostatic potential contributed by amino  
787 acids in contact with the internal volume, as calculated using PDB2PQR and APBS (Propka pH 7.0,  
788 Swanson force field,  $\pm 5$  kT/e). All protein structures were visualized and rendered in PyMol.  
789 Evolutionarily-coupled amino acids within the same protein were analyzed using RaptorX-Contact  
790 (Wang *et al.*, 2017), while evolutionarily-coupled residues between two proteins were determined  
791 using RaptorX-ComplexContact (Zeng *et al.*, 2018) (<http://raptorx.uchicago.edu/>). Protein contact  
792 maps were displayed in GraphPad.

793

### 794 *Identification of OPX proteins*

795 Three types of datasets i.e., 61 order Myxococcales genomes (MYXO), 3662 reference and  
796 representative bacterial genomes (REP; downloaded on Dec 7, 2021), and non-redundant NCBI  
797 database (NR) (371 327 556 proteins at 100% identify as of June 10, 2021) were downloaded from  
798 NCBI. Pfam domains attributed to PF02563 [Poly\_export], PF10531 [SLBB], PF18412 [Wza\_C],  
799 and PF06251 [Caps\_synth\_GfcC; used here as GfcC] were extracted from the Pfam-A v34.0  
800 database (Mistry *et al.*, 2021) (downloaded: March 24, 2021) and a reduced combined profile  
801 database was created. These functional domains were identified by scanning all three types of  
802 datasets (MYXO, REP, and NR) using offline hmmscan (Potter *et al.*, 2018) against the created  
803 database with an E-value cutoff of  $1 \times 10^{-5}$ . The resultant files were parsed using hmmscan-parser.sh,  
804 sorted and arranged in the form of protein architecture using in-house scripts. Based on the identified  
805 domains per protein per dataset, three primary clusters were curated. All identified proteins within

806 these primary clusters were subjected to fold-recognition analysis using HHpred (Söding *et al.*, 2005)  
807 against the database of two proteins (PDB: 2J58 [i.e. Wza<sub>Ec</sub>] and PDB: 3P42 [i.e. GfcC]; extracted  
808 from PDBmmCIF70 downloaded on Nov 19, 2021) using “-p 5 -Z 500 -loc -z 1 -b 1 -B 500 -all -id  
809 35 -ssm 2 -sc 1 -seq 1 -dbstrlen 10000 -norealign -maxres 32000” parameters. HHpred raw data was  
810 parsed using in-house scripts to generate the architecture of each protein in terms of non-overlapping  
811 homologous regions to 2J58 and 3P42. To identify the type of signal peptide and the cleavage site  
812 location, each OPX protein was subject to SignalP 6.0 analysis (Teufel *et al.*, 2022) and to predict the  
813 membrane topology of the proteins, TMHMM (Server v. 2.0) (Krogh *et al.*, 2001) was used.

814 Based on HHpred analysis, we also investigated the secondary structure-based homology of  
815 primary cluster proteins with a Wza\_C segment (aa 326 – 359; 34 amino acid length) in PDB 2J58. If  
816 a protein was showing secondary structural homology with at least 10/34 amino acids of the Wza\_C  
817 segment (aa 326 – 359) in 2J58, we considered it as a true Wza\_C segment in the respective protein.  
818 Proteins with both 2J58- and 3P42-homologous non-overlapping regions were classified as Class 2.  
819 Proteins having only 2J58-homologous regions along with a Wza\_C segment were classified as Class  
820 1. Other proteins with only 2J58-homologous regions and no Wza\_C segment were classified as  
821 Class 3. We also generated sequence logos using WebLogo (Crooks *et al.*, 2004) (v.2.8) for 2°  
822 structure-based homologues of Wza\_C segments as identified in Class 1 and Class 2B OPX proteins.

823

### 824 ***Synteny analysis of $\beta$ -barrel query proteins with identified OPX proteins***

825 Along with the identification of the above-mentioned domains and classification of all OPX  
826 proteins into three classes, we identified the  $\beta$ -barrel homologues encoded in the vicinity ( $\pm 10$  genes)  
827 of our OPX genes in genomes from both the MYXO and REP databases. We analyzed the various  
828 predicted proteomes of both datasets with BLASTp and hmmscan using protein sequences from *M.*  
829 *xanthus* DZ2 (MXAN\_7418 [aa 24 – 415], MXAN\_3226 [aa 23 – 381], and MXAN\_1916 [aa 26 –  
830 421]), *E. coli* K12 (PgaA [aa 511 – 807], GfcD [aa 425 – 698], YjbH [aa 423 – 698], BcsC [aa 785 –  
831 1157], and Wzi [aa 92 – 479], as well as *P. aeruginosa* PAO1 AlgE [aa 33 – 490]. Detected  
832 homologues for each query profile were aligned against the truncated and full-length sequences for  
833 each query protein using Clustal Omega to probe for the lone presence of a putative  $\beta$ -barrel  
834 polysaccharide secretion porin domain versus its presence as part of a multi-domain polypeptide  
835 comparable to the native sequence. Hits resembling truncated versions of various  $\beta$ -barrel queries  
836 were individually profiled via fold-recognition using the online HHpred bioinformatics toolkit  
837 (Zimmermann *et al.*, 2018) (<https://toolkit.tuebingen.mpg.de/tools/hhpred>). Depicted sequence



838 alignments were displayed in GeneDoc with residues colored according to conservation score (out of  
839 10) as indicated in JalView (Waterhouse *et al.*, 2009).

840

#### 841 ***Phylogenetic analysis of OPX proteins***

842 The PF02563 [Poly\_export] domain of OPX proteins was used as a phylogenetic marker. The  
843 locations of all identified ‘Poly\_export’ domains were first extracted, after which extracted sequences  
844 were aligned using MUSCLE (with 10 iterations). The resultant alignment was analyzed via  
845 FastTree 2.1.10 to generate a maximum likelihood tree of OPX proteins. Tree visualization as well as  
846 mapping of the OPX protein classification and taxonomy of each branch were performed via the  
847 iTOL web server Version 6.4.3 (Letunic & Bork, 2021).

848

#### 849 ***Bacterial membrane modeling and intermembrane distance measurements***

850 Desired prokaryotic tomograms were downloaded from the Caltech Electron Tomography  
851 Database (<https://etdb.caltech.edu/>). Forty species were analyzed, each via three separate tomograms.  
852 Tomogram inspection and modeling were performed using the IMOD software package (Kremer *et*  
853 *al.*, 1996). Tomograms were first oriented in 3D using the IMOD “Slicer” window to identify the  
854 central slice through each bacterium. To enhance contrast, 5 layers of voxels were averaged around  
855 the section of interest. Model points were then placed along corresponding regions of the OM and IM  
856 for a total distance of ~100 nm. A custom Python script was subsequently used to calculate the  
857 intermembrane distance every 0.1 nm along the modeled stretch of membranes. GraphPad was used  
858 to prepare plots and carry out correlation analyses.

859

#### 860 ***Bacterial cell culture***

861 Information on wild-type *M. xanthus* DZ2 (Campos & Zusman, 1975) and isogenic mutant  
862 strains analyzed herein can be found in **Table 2**. Strains were grown and maintained at 32 °C on  
863 Casitone-yeast extract (CYE) (1% casitone, 0.5% yeast extract, 10 mM MOPS [pH 7.5], 4 mM  
864 MgSO<sub>4</sub>) 1.5% agar (BD Difco) plates or in CYE liquid medium at 32 °C on a rotary shaker at 220  
865 rpm.

866

#### 867 ***Mutant construction***

868 As previously described (Islam *et al.*, 2020), to generate a *M. xanthus* deletion-mutant strain,  
869 500 bp upstream and 500 bp downstream of the target gene were amplified and fused via PCR,

870 subjected to double digestion with restriction enzymes, then ligated into the pBJ114 plasmid.  
871 Products were used to transform chemically-competent *E. coli* DH10B via heatshock, after which  
872 cells were plated on LB agar supplemented with kanamycin (50 µg/mL) to select for drug-resistant  
873 colonies. Successful clones were verified via sequencing. Resultant plasmids were then introduced  
874 into *M. xanthus* DZ2 via electroporation. Mutants resulting from homologous recombination of  
875 deletion alleles were obtained by selection on CYE agar plates containing kanamycin (100 µg/mL).  
876 A second selection was then made on CYE agar plates containing galactose (2.5%) to obtain the final  
877 deletion strain, with mutants verified via PCR amplification using flanking primers.

878

### 879 ***Trypan blue dye retention***

880 Retention of the dye Trypan Blue was carried out as previously described (Islam *et al.*, 2020).  
881 In brief, cells from overnight CYE cultures were first resuspended to OD<sub>600</sub> 1.0 in TPM buffer.  
882 Resuspended cells (or a cell-free blank) (900 µL) were then mixed with Trypan Blue solution (100  
883 µL, 100 µg/mL stock concentration) in a microfuge tube and briefly pulsed (1 s) via vortex mixer.  
884 Samples were incubated at room temperature, in a tube rack covered with aluminum foil, atop a  
885 rocker platform (1 h) to facilitate dye binding by the cells. Samples were subsequently sedimented  
886 (16 000 × g, 5 min), after which the top 900 µL of blank or clarified supernatant was transferred to a  
887 disposable spectrophotometer cuvette. The cell-free “TPM + Trypan Blue” sample was used to blank  
888 the spectrophotometer at 585 nm. The absorbance at 585 nm (A<sub>585</sub>) was then determined for each  
889 clarified supernatant. Finally, absorbance values were normalized to the respective A<sub>585</sub> value for the  
890 WT of each biological replicate. Sub-zero final values are due to trace amounts of cell debris  
891 detected at 585 nm in individual samples in which absolutely no binding of Trypan Blue occurred.

892

### 893 ***Phenotypic analyses***

894 Cells from exponentially-growing cultures were harvested and resuspended in TPM buffer (10  
895 mM Tris-HCl, pH 7.6, 8 mM MgSO<sub>4</sub> and 1 mM KH<sub>2</sub>PO<sub>4</sub>) at a final concentration of OD<sub>600</sub> 5.0. To  
896 study T4P-dependent swarm expansion, this cell suspension (5 µL) was spotted onto CYE 0.5% agar.  
897 Plates were incubated at 32 °C (72 h), then imaged with an Olympus SZX16 stereoscope with UC90  
898 4K camera. For T4P-dependent motility, swarm images were captured using the 0.5× objective at 1×  
899 zoom, using linear color and darkfield illumination.

900

901

902 ***Auto-aggregation testing***

903       The protocol followed has been previously detailed (Saïdi *et al.*, 2021). In brief, the turbidity  
904 (OD<sub>600</sub>) of *M. xanthus* CYE cultures (12.5 mL) grown overnight was determined via  
905 spectrophotometer. Specific culture volumes were aspirated, then sedimented via microfuge (4000 ×  
906 g, 5 min) so pellet resuspension in 1 mL CYE broth would yield a final OD<sub>600</sub> of either 1.0. Broth-  
907 resuspended cells were then transferred to a polystyrene spectrophotometer cuvette. Resuspensions  
908 were strongly aspirated and ejected in the cuvette (10 s) via p200 micropipette, then immediate read  
909 for OD<sub>600</sub> ( $t = 0$ ) in a spectrophotometer. Time-course readings of OD<sub>600</sub> were taken every 10 min up  
910 to 100 min of monitoring. In between readings, cuvettes were left covered and undisturbed on the  
911 benchtop in a cuvette box. All OD<sub>600</sub> readings were normalized to the OD<sub>600</sub> determined at  $t = 0$  for  
912 each sample.

## 913 **ACKNOWLEDGEMENTS**

914           The authors would like to thank Yossef Lopez de Los Santos for protein modelling feedback,  
915 Omaima Rebay for cloning assistance, and Joseph Lam for critical reading of the manuscript. A  
916 Discovery operating grant (RGPIN-2016-06637) from the Natural Sciences and Engineering  
917 Research Council of Canada (NSERC) supported this work in the lab of S.T.I. as well as studentships  
918 for F.S. and N.Y.J. F.S., N.Y.J., and R.B. are recipients of graduate studentships from the PROTEO  
919 research network. This work was also supported by (i) a DST-INSPIRE Faculty award to G.S. from  
920 the Department of Science and Technology (DST), India, a (ii) DST-INSPIRE Fellowship to U.M.  
921 from the DST, India, (iii) partial support from the Department of Electronics, IT, BT, and S&T of the  
922 Government of Karnataka, India to U.M., A.P., and G.S., and (iv) a David and Lucile Packard  
923 Fellowship for Science and Engineering (2019-69645) to Y.-W.C. The funders had no role in study  
924 design, data collection and interpretation, or the decision to submit the work for publication. The  
925 authors declare that the research was conducted in the absence of any commercial or financial  
926 relationships that could be construed as a potential conflict of interest.

927 **COMPETING INTERESTS**

928 The authors declare no financial or non-financial competing interests.

929 **AUTHOR CONTRIBUTIONS**

930 STI and GS conceived of and planned the study.

931 UM, AP, and GS performed comparative genomics studies.

932 FS and RB generated mutant strains.

933 FS performed phenotypic, dye-binding, and auto-aggregation analyses.

934 FS and NYJ performed HOLLOW and electrostatics analyses.

935 STI and AM carried out protein modelling.

936 MM and GJ designed the periplasmic analysis workflow, with analysis by FS.

937 STI, GS, and FS wrote the manuscript.

938 STI and GS generated figures.

939 STI, GS, CC, and YWC contributed personnel and funding support.

## 940 REFERENCES

- 941 Acheson, J.F., Derewenda, Z.S., and Zimmer, J. (2019) Architecture of the cellulose synthase outer  
942 membrane channel and its association with the periplasmic TPR domain. *Structure* **27**: 1855-  
943 1861.e1853.
- 944 Arrecubieta, C., Hammarton, T.C., Barrett, B., Chareonsudjai, S., Hodson, N., Rainey, D., and  
945 Roberts, I.S. (2001) The transport of Group 2 capsular polysaccharides across the periplasmic  
946 space in *Escherichia coli*: roles for the KpsE and KpsD proteins\*. *J. Biol. Chem.* **276**: 4245-  
947 4250.
- 948 Baeza-Delgado, C., Marti-Renom, M.A., and Mingarro, I. (2013) Structure-based statistical analysis  
949 of transmembrane helices. *Eur. Biophys. J.* **42**: 199-207.
- 950 Becker, A. (2015) Challenges and perspectives in combinatorial assembly of novel  
951 exopolysaccharide biosynthesis pathways. *Front. Microbiol.* **6**.
- 952 Behmlander, R.M., and Dworkin, M. (1994) Biochemical and structural analyses of the extracellular  
953 matrix fibrils of *Myxococcus xanthus*. *J. Bacteriol.* **176**: 6295-6303.
- 954 Beis, K., Collins, R.F., Ford, R.C., Kamis, A.B., Whitfield, C., and Naismith, J.H. (2004) Three-  
955 dimensional structure of Wza, the protein required for translocation of Group 1 capsular  
956 polysaccharide across the outer membrane of *Escherichia coli*\*. *J. Biol. Chem.* **279**: 28227-  
957 28232.
- 958 Bliss, J.M., and Silver, R.P. (1996) Coating the surface: a model for expression of capsular polysialic  
959 acid in *Escherichia coli* K1. *Mol. Microbiol.* **21**: 221-231.
- 960 Burroughs, A.M., Balaji, S., Iyer, L.M., and Aravind, L. (2007) A novel superfamily containing the  
961  $\beta$ -grasp fold involved in binding diverse soluble ligands. *Biol. Direct* **2**: 4.
- 962 Bushell, Simon R., Mainprize, Iain L., Wear, Martin A., Lou, H., Whitfield, C., and Naismith,  
963 James H. (2013) Wzi Is an outer membrane lectin that underpins group 1 capsule assembly in  
964 *Escherichia coli*. *Structure* **21**: 844-853.
- 965 Campos, J.M., and Zusman, D.R. (1975) Regulation of development in *Myxococcus xanthus*: effect  
966 of 3':5'-cyclic AMP, ADP, and nutrition. *Proc. Natl. Acad. Sci. U. S. A.* **72**: 518-522.
- 967 Collins, R.F., Beis, K., Dong, C., Botting, C.H., McDonnell, C., Ford, R.C., Clarke, B.R., Whitfield,  
968 C., and Naismith, J.H. (2007) The 3D structure of a periplasm-spanning platform required for  
969 assembly of group 1 capsular polysaccharides in *Escherichia coli*. *Proc. Natl. Acad. Sci. U. S.*  
970 *A.* **104**: 2390-2395.
- 971 Crooks, G.E., Hon, G., Chandonia, J.-M., and Brenner, S.E. (2004) WebLogo: a sequence logo  
972 generator. *Genome Res.* **14**: 1188-1190.
- 973 Cuthbertson, L., Mainprize, I.L., Naismith, J.H., and Whitfield, C. (2009) Pivotal roles of the outer  
974 membrane polysaccharide export and polysaccharide copolymerase protein families in export  
975 of extracellular polysaccharides in Gram-negative bacteria. *Microbiol. Mol. Biol. Rev.* **73**:  
976 155-177.
- 977 Dong, C., Beis, K., Nesper, J., Brunkan-LaMontagne, A.L., Clarke, B.R., Whitfield, C., and  
978 Naismith, J.H. (2006) Wza the translocon for *E. coli* capsular polysaccharides defines a new  
979 class of membrane protein. *Nature* **444**: 226.

- 980 Drummelsmith, J., and Whitfield, C. (2000) Translocation of group 1 capsular polysaccharide to the  
981 surface of *Escherichia coli* requires a multimeric complex in the outer membrane. *EMBO J.*  
982 **19**: 57-66.
- 983 Ducret, A., Valignat, M.-P., Mouhamar, F., Mignot, T., and Theodoly, O. (2012) Wet-surface-  
984 enhanced ellipsometric contrast microscopy identifies slime as a major adhesion factor during  
985 bacterial surface motility. *Proc. Natl. Acad. Sci. USA* **109**: 10036-10041.
- 986 Erskine, E., MacPhee, C.E., and Stanley-Wall, N.R. (2018) Functional amyloid and other protein  
987 fibers in the biofilm matrix. *J. Mol. Biol.* **430**: 3642-3656.
- 988 Faure, L.M., Fiche, J.-B., Espinosa, L., Ducret, A., Anantharaman, V., Luciano, J., Lhospice, S.,  
989 Islam, S.T., Tréguier, J., Sotes, M., Kuru, E., Van Nieuwenhze, M.S., Brun, Y., Théodoly, O.,  
990 L, A., Nollmann, M., and Mignot, T. (2016) The mechanism of force transmission at bacterial  
991 focal adhesion complexes. *Nature* **539**: 530-535.
- 992 Ferrières, L., Aslam, S.N., Cooper, R.M., and Clarke, D.J. (2007) The *yjbEFGH* locus in *Escherichia*  
993 *coli* K-12 is an operon encoding proteins involved in exopolysaccharide production.  
994 *Microbiology* **153**: 1070-1080.
- 995 Ford, R.C., Brunkan-LaMontagne, A.L., Collins, R.F., Clarke, B.R., Harris, R., Naismith, J.H., and  
996 Whitfield, C. (2009) Structure-function relationships of the outer membrane translocon Wza  
997 investigated by cryo-electron microscopy and mutagenesis. *J. Struct. Biol.* **166**: 172-182.
- 998 Franklin, M.J., Nivens, D.E., Weadge, J.T., and Howell, P.L. (2011) Biosynthesis of the  
999 *Pseudomonas aeruginosa* extracellular polysaccharides, alginate, Pel, and Psl. *Front.*  
1000 *Microbiol.* **2**: 167.
- 1001 Gibiansky, M.L., Hu, W., Dahmen, K.A., Shi, W., and Wong, G.C.L. (2013) Earthquake-like  
1002 dynamics in *Myxococcus xanthus* social motility. *Proc. Natl. Acad. Sci. USA* **110**: 2330-2335.
- 1003 Ho, B.K., and Gruswitz, F. (2008) HOLLOW: generating accurate representations of channel and  
1004 interior surfaces in molecular structures. *BMC Struct. Biol.* **8**: 49.
- 1005 Holkenbrink, C., Hoiczky, E., Kahnt, J., and Higgs, P.I. (2014) Synthesis and assembly of a novel  
1006 glycan layer in *Myxococcus xanthus* spores. *J. Biol. Chem.* **289**: 32364-32378.
- 1007 Hu, W., Lux, R., and Shi, W., (2013) Analysis of exopolysaccharides in *Myxococcus xanthus* using  
1008 confocal laser scanning microscopy. In: *Bacterial Cell Surfaces: Methods and Protocols*. A.H.  
1009 Delcour (ed). Totowa, NJ: Humana Press, pp. 121-131.
- 1010 Islam, S.T., Eckford, P.D.W., Jones, M.L., Nugent, T., Bear, C.E., Vogel, C., and Lam, J.S. (2013a)  
1011 Proton-dependent gating and proton uptake by Wzx support O-antigen-subunit antiport across  
1012 the bacterial inner membrane. *mBio* **4**: e00678-00613.
- 1013 Islam, S.T., Fieldhouse, R.J., Anderson, E.M., Taylor, V.L., Keates, R.A.B., Ford, R.C., and Lam,  
1014 J.S. (2012) A cationic lumen in the Wzx flippase mediates anionic O-antigen subunit  
1015 translocation in *Pseudomonas aeruginosa* PAO1. *Mol. Microbiol.* **84**: 1165-1176.
- 1016 Islam, S.T., Gold, A.C., Taylor, V.L., Anderson, E.M., Ford, R.C., and Lam, J.S. (2011) Dual  
1017 conserved periplasmic loops possess essential charge characteristics that support a catch-and-  
1018 release mechanism of O-antigen polymerization by Wzy in *Pseudomonas aeruginosa* PAO1.  
1019 *J. Biol. Chem.* **286**: 20600-20605.



- 1020 Islam, S.T., Huszczyński, S.M., Nugent, T., Gold, A.C., and Lam, J.S. (2013b) Conserved-residue  
1021 mutations in Wzy affect O-antigen polymerization and Wzz-mediated chain-length regulation  
1022 in *Pseudomonas aeruginosa* PAO1. *Sci. Rep.* **3**: 3441.
- 1023 Islam, S.T., and Lam, J.S. (2014) Synthesis of bacterial polysaccharides via the Wzx/Wzy-dependent  
1024 pathway. *Can. J. Microbiol.* **60**: 697-716.
- 1025 Islam, S.T., and Mignot, T. (2015) The mysterious nature of bacterial surface (gliding) motility: a  
1026 focal adhesion-based mechanism in *Myxococcus xanthus*. *Semin. Cell Dev. Biol.* **46**: 143-154.
- 1027 Islam, S.T., Taylor, V.L., Qi, M., and Lam, J.S. (2010) Membrane topology mapping of the O-  
1028 antigen flippase (Wzx), polymerase (Wzy), and ligase (WaaL) from *Pseudomonas aeruginosa*  
1029 PAO1 reveals novel domain architectures. *mBio* **1**: e00189-00110.
- 1030 Islam, S.T., Vergara Alvarez, I., Saïdi, F., Guiseppi, A., Vinogradov, E., Sharma, G., Espinosa, L.,  
1031 Morrone, C., Basseur, G., Guillemot, J.-F., Benarouche, A., Bridot, J.-L., Ravicoularamin,  
1032 G., Cagna, A., Gauthier, C., Singer, M., Fierobe, H.-P., Mignot, T., and Mauriello, E.M.F.  
1033 (2020) Modulation of bacterial multicellularity via spatio-specific polysaccharide secretion.  
1034 *PLOS Biol.* **18**: e3000728.
- 1035 Jumper, J., Evans, R., Pritzel, A., Green, T., Figurnov, M., Ronneberger, O., Tunyasuvunakool, K.,  
1036 Bates, R., Židek, A., Potapenko, A., Bridgland, A., Meyer, C., Kohl, S.A.A., Ballard, A.J.,  
1037 Cowie, A., Romera-Paredes, B., Nikolov, S., Jain, R., Adler, J., Back, T., Petersen, S.,  
1038 Reiman, D., Clancy, E., Zielinski, M., Steinegger, M., Pacholska, M., Berghammer, T.,  
1039 Bodenstein, S., Silver, D., Vinyals, O., Senior, A.W., Kavukcuoglu, K., Kohli, P., and  
1040 Hassabis, D. (2021) Highly accurate protein structure prediction with AlphaFold. *Nature* **596**:  
1041 583-589.
- 1042 Kahnt, J.r., Aguiluz, K., Koch, J.r., Treuner-Lange, A., Konovalova, A., Huntley, S., Hoppert, M.,  
1043 Søggaard-Andersen, L., and Hedderich, R. (2010) Profiling the outer membrane proteome  
1044 during growth and development of the social bacterium *Myxococcus xanthus* by selective  
1045 biotinylation and analyses of outer membrane vesicles. *J. Proteome Res.* **9**: 5197-5208.
- 1046 Kong, L., Harrington, L., Li, Q., Cheley, S., Davis, B.G., and Bayley, H. (2013) Single-molecule  
1047 interrogation of a bacterial sugar transporter allows the discovery of an extracellular inhibitor.  
1048 *Nat. Chem.* **5**: 651-659.
- 1049 Kremer, J.R., Mastronarde, D.N., and McIntosh, J.R. (1996) Computer visualization of three-  
1050 dimensional image data using IMOD. *J. Struct. Biol.* **116**: 71-76.
- 1051 Krogh, A., Larsson, B., von Heijne, G., and Sonnhammer, E.L.L. (2001) Predicting transmembrane  
1052 protein topology with a hidden markov model: application to complete genomes. *J. Mol. Biol.*  
1053 **305**: 567-580.
- 1054 Lavelle, K., Sinderen, D.v., and Mahony, J. (2021) Cell wall polysaccharides of Gram positive  
1055 ovococcoid bacteria and their role as bacteriophage receptors. *Comput. Struct. Biotechnol. J.*  
1056 **19**: 4018-4031.
- 1057 Letunic, I., and Bork, P. (2021) Interactive Tree Of Life (iTOL) v5: an online tool for phylogenetic  
1058 tree display and annotation. *Nucleic Acids Res.* **49**: W293-W296.
- 1059 Liston, S.D., McMahan, S.A., Le Bas, A., Suits, M.D.L., Naismith, J.H., and Whitfield, C. (2018)  
1060 Periplasmic depolymerase provides insight into ABC transporter-dependent secretion of  
1061 bacterial capsular polysaccharides. *Proc. Natl. Acad. Sci. U. S. A.* **115**: E4870-E4879.

- 1062 Mahendran, K.R., Niitsu, A., Kong, L., Thomson, A.R., Sessions, R.B., Woolfson, D.N., and Bayley,  
1063 H. (2017) A monodisperse transmembrane  $\alpha$ -helical peptide barrel. *Nat. Chem.* **9**: 411-419.
- 1064 Mathavan, I., Zirah, S., Mehmood, S., Choudhury, H.G., Goulard, C., Li, Y., Robinson, C.V.,  
1065 Rebuffat, S., and Beis, K. (2014) Structural basis for hijacking siderophore receptors by  
1066 antimicrobial lasso peptides. *Nat. Chem. Biol.* **10**: 340-342.
- 1067 McNulty, C., Thompson, J., Barrett, B., Lord, L., Andersen, C., and Roberts, I.S. (2006) The cell  
1068 surface expression of group 2 capsular polysaccharides in *Escherichia coli*: the role of KpsD,  
1069 RhsA and a multi-protein complex at the pole of the cell. *Mol. Microbiol.* **59**: 907-922.
- 1070 Mistry, J., Chuguransky, S., Williams, L., Qureshi, M., Salazar, Gustavo A., Sonnhammer, E.L.L.,  
1071 Tosatto, S.C.E., Paladin, L., Raj, S., Richardson, L.J., Finn, R.D., and Bateman, A. (2021)  
1072 Pfam: the protein families database in 2021. *Nucleic Acids Res.* **49**: D412-D419.
- 1073 Mori, Y., Maeda, M., Takegawa, K., and Kimura, Y. (2012) PhpA, a tyrosine phosphatase of  
1074 *Myxococcus xanthus*, is involved in the production of exopolysaccharide. *Microbiology* **158**:  
1075 2546-2555.
- 1076 Muñoz-Dorado, J., Marcos-Torres, F.J., García-Bravo, E., Moraleda-Muñoz, A., and Pérez, J. (2016)  
1077 Myxobacteria: moving, killing, feeding, and surviving together. *Front. Microbiol.* **7**.
- 1078 Muñoz-Dorado, J., Moraleda-Muñoz, A., Marcos-Torres, F.J., Contreras-Moreno, F.J., Martin-  
1079 Cuadrado, A.B., Schrader, J.M., Higgs, P.I., and Pérez, J. (2019) Transcriptome dynamics of  
1080 the *Myxococcus xanthus* multicellular developmental program. *eLife* **8**: e50374.
- 1081 Nesper, J., Hill, C.M.D., Paiment, A., Harauz, G., Beis, K., Naismith, J.H., and Whitfield, C. (2003)  
1082 Translocation of group 1 capsular polysaccharide in *Escherichia coli* serotype K30: structural  
1083 and functional analysis of the outer membrane lipoprotein Wza\*. *J. Biol. Chem.* **278**: 49763-  
1084 49772.
- 1085 Nickerson, N.N., Mainprize, I.L., Hampton, L., Jones, M.L., Naismith, J.H., and Whitfield, C. (2014)  
1086 Trapped translocation intermediates establish the route for export of capsular polysaccharides  
1087 across *Escherichia coli* outer membranes. *Proc. Natl. Acad. Sci. USA* **111**: 8203-8208.
- 1088 Pavlova, A., Hwang, H., Lundquist, K., Balusek, C., and Gumbart, J.C. (2016) Living on the edge:  
1089 simulations of bacterial outer-membrane proteins. *Biochim. Biophys. Acta* **1858**: 1753-1759.
- 1090 Peleg, A., Shifrin, Y., Ilan, O., Nadler-Yona, C., Nov, S., Koby, S., Baruch, K., Altuvia, S., Elgrably-  
1091 Weiss, M., Abe, C.M., Knutton, S., Saper, M.A., and Rosenshine, I. (2005) Identification of  
1092 an *Escherichia coli* operon required for formation of the O-antigen capsule. *J. Bacteriol.* **187**:  
1093 5259-5266.
- 1094 Pérez-Burgos, M., García-Romero, I., Jung, J., Schander, E., Valvano, M.A., and Søggaard-Andersen,  
1095 L. (2020) Characterization of the exopolysaccharide biosynthesis pathway in *Myxococcus*  
1096 *xanthus*. *J. Bacteriol.* **202**: e00335-00320.
- 1097 Pérez-Burgos, M., and Søggaard-Andersen, L. (2020) Biosynthesis and function of cell-surface  
1098 polysaccharides in the social bacterium *Myxococcus xanthus*. *Biol. Chem.* **401**: 1375-1387.
- 1099 Potter, S.C., Luciani, A., Eddy, S.R., Park, Y., Lopez, R., and Finn, R.D. (2018) HMMER web  
1100 server: 2018 update. *Nucl. Acids Res.* **46**: W200-W204.
- 1101 Reeves, P.R., Hobbs, M., Valvano, M.A., Skurnik, M., Whitfield, C., Coplin, D., Kido, N., Klena, J.,  
1102 Maskell, D., Raetz, C.R.H., and Rick, P.D. (1996) Bacterial polysaccharide synthesis and  
1103 gene nomenclature. *Trends Microbiol.* **4**: 495-503.

- 1104 Rouse, S.L., Hawthorne, W.J., Berry, J.-L., Chorev, D.S., Ionescu, S.A., Lambert, S., Stylianou, F.,  
1105 Ewert, W., Mackie, U., Morgan, R.M.L., Otzen, D., Herbst, F.-A., Nielsen, P.H., Dueholm,  
1106 M., Bayley, H., Robinson, C.V., Hare, S., and Matthews, S. (2017) A new class of hybrid  
1107 secretion system is employed in *Pseudomonas amyloid* biogenesis. *Nat. Commun.* **8**: 263.
- 1108 Rutten, L., Geurtsen, J., Lambert, W., Smolenaers, J.J.M., Bonvin, A.M., de Haan, A., van der Ley,  
1109 P., Egmond, M.R., Gros, P., and Tommassen, J. (2006) Crystal structure and catalytic  
1110 mechanism of the LPS 3-O-deacylase PagL from *Pseudomonas aeruginosa*. *Proc. Natl. Acad.*  
1111 *Sci. U. S. A.* **103**: 7071-7076.
- 1112 Saïdi, F., Jolivet, N.Y., Lemon, D.J., Nakamura, A., Belgrave, A.M., Garza, A.G., Veyrier, F.J., and  
1113 Islam, S.T. (2021) Bacterial glycoalyx integrity drives multicellular swarm biofilm  
1114 dynamism. *Mol. Microbiol.* **116**: DOI: 10.1111/mmi.14803.
- 1115 Sande, C., Bouwman, C., Kell, E., Nickerson, N.N., Kapadia, S.B., and Whitfield, C. (2019)  
1116 Structural and functional variation in outer membrane polysaccharide export (OPX) proteins  
1117 from the two major capsule assembly pathways present in *Escherichia coli*. *J. Bacteriol.* **201**:  
1118 e00213-00219.
- 1119 Sande, C., and Whitfield, C. (2021) Capsules and extracellular polysaccharides in *Escherichia coli*  
1120 and *Salmonella*. *EcoSal Plus* **9**: eESP-0033-2020.
- 1121 Sathiyamoorthy, K., Mills, E., Franzmann, T.M., Rosenshine, I., and Saper, M.A. (2011) The crystal  
1122 structure of *Escherichia coli* Group 4 capsule protein GfcC reveals a domain organization  
1123 resembling that of Wza. *Biochemistry* **50**: 5465-5476.
- 1124 Seef, S., Herrou, J., de Boissier, P., My, L., Brasseur, G., Robert, D., Jain, R., Mercier, R., Cascales,  
1125 E., Habermann, B.H., and Mignot, T. (2021) A Tad-like apparatus is required for contact-  
1126 dependent prey killing in predatory social bacteria. *eLife* **10**: e72409.
- 1127 Sharma, G., Yao, A.I., Smaldone, G.T., Liang, J., Long, M., Facciotti, M.T., and Singer, M. (2021)  
1128 Global gene expression analysis of the *Myxococcus xanthus* developmental time course.  
1129 *Genomics* **113**: 120-134.
- 1130 Silver, R.P., Aaronson, W., and Vann, W.F. (1987) Translocation of capsular polysaccharides in  
1131 pathogenic strains of *Escherichia coli* requires a 60-kilodalton periplasmic protein. *J.*  
1132 *Bacteriol.* **169**: 5489-5495.
- 1133 Smaldone, G.T., Jin, Y., Whitfield, D.L., Mu, A.Y., Wong, E.C., Wuertz, S., and Singer, M. (2014)  
1134 Growth of *Myxococcus xanthus* in continuous-flow-cell bioreactors as a method for studying  
1135 development. *Appl. Environ. Microbiol.* **80**: 2461-2467.
- 1136 Söding, J., Biegert, A., and Lupas, A.N. (2005) The HHpred interactive server for protein homology  
1137 detection and structure prediction. *Nucl. Acids Res.* **33**: W244-W248.
- 1138 Solan, R., Pereira, J., Lupas, A.N., Kolodny, R., and Ben-Tal, N. (2021) Gram-negative outer-  
1139 membrane proteins with multiple  $\beta$ -barrel domains. *Proc. Natl. Acad. Sci. U. S. A.* **118**:  
1140 e2104059118.
- 1141 Sutherland, I.W., and Thomson, S. (1975) Comparison of polysaccharides produced by *Myxococcus*  
1142 strains. *J. Gen. Microbiol.* **89**: 124-132.
- 1143 Tan, J., Rouse, S.L., Li, D., Pye, V.E., Vogeley, L., Brinth, A.R., El Arnaout, T., Whitney, J.C.,  
1144 Howell, P.L., Sansom, M.S.P., and Caffrey, M. (2014) A conformational landscape for

- 1145 alginate secretion across the outer membrane of *Pseudomonas aeruginosa*. *Acta Crystallogr.*  
1146 *D Biol. Crystallogr.* **70**: 2054-2068.
- 1147 Teufel, F., Almagro Armenteros, J.J., Johansen, A.R., Gíslason, M.H., Pihl, S.I., Tsirigos, K.D.,  
1148 Winther, O., Brunak, S., von Heijne, G., and Nielsen, H. (2022) SignalP 6.0 predicts all five  
1149 types of signal peptides using protein language models. *Nat. Biotechnol.*
- 1150 Toh, E., Kurtz, H.D., and Brun, Y.V. (2008) Characterization of the *Caulobacter crescentus* holdfast  
1151 polysaccharide biosynthesis pathway reveals significant redundancy in the initiating  
1152 glycosyltransferase and polymerase steps. *J. Bacteriol.* **190**: 7219-7231.
- 1153 Wang, S., Sun, S., Li, Z., Zhang, R., and Xu, J. (2017) Accurate *de novo* prediction of protein contact  
1154 map by ultra-deep learning model. *PLOS Comput. Biol.* **13**: e1005324.
- 1155 Wang, Y., Andole Pannuri, A., Ni, D., Zhou, H., Cao, X., Lu, X., Romeo, T., and Huang, Y. (2016)  
1156 Structural basis for translocation of a biofilm-supporting exopolysaccharide across the  
1157 bacterial outer membrane\*. *J. Biol. Chem.* **291**: 10046-10057.
- 1158 Wartel, M., Ducret, A., Thutupalli, S., Czerwinski, F., Le Gall, A.-V., Mauriello, E.M.F., Bergam, P.,  
1159 Brun, Y.V., Shaevitz, J., and Mignot, T. (2013) A versatile class of cell surface directional  
1160 motors gives rise to gliding motility and sporulation in *Myxococcus xanthus*. *PLoS Biol.* **11**:  
1161 e1001728.
- 1162 Waterhouse, A.M., Procter, J.B., Martin, D.M.A., Clamp, M., and Barton, G.J. (2009) Jalview  
1163 Version 2—a multiple sequence alignment editor and analysis workbench. *Bioinformatics* **25**:  
1164 1189-1191.
- 1165 Whitfield, C., and Valvano, M.A., (1993) Biosynthesis and expression of cell-surface  
1166 polysaccharides in Gram-negative bacteria. In: *Advances in Microbial Physiology*. A.H. Rose  
1167 (ed). Academic Press, pp. 135-246.
- 1168 Whitfield, C., Wear, S.S., and Sande, C. (2020) Assembly of bacterial capsular polysaccharides and  
1169 exopolysaccharides. *Annu. Rev. Microbiol.* **74**: 521-543.
- 1170 Whitney, J.C., and Howell, P.L. (2013) Synthase-dependent exopolysaccharide secretion in Gram-  
1171 negative bacteria. *Trends Microbiol.* **21**: 63-72.
- 1172 Willis, L.M., and Whitfield, C. (2013) Structure, biosynthesis, and function of bacterial capsular  
1173 polysaccharides synthesized by ABC transporter-dependent pathways. *Carbohydr. Res.* **378**:  
1174 35-44.
- 1175 Wirth, C., Condemine, G., Boiteux, C., Bernèche, S., Schirmer, T., and Peneff, C.M. (2009) NanC  
1176 crystal structure, a model for outer-membrane channels of the acidic sugar-specific KdgM  
1177 porin family. *J. Mol. Biol.* **394**: 718-731.
- 1178 Wunder, D.E., Aaronson, W., Hayes, S.F., Bliss, J.M., and Silver, R.P. (1994) Nucleotide sequence  
1179 and mutational analysis of the gene encoding KpsD, a periplasmic protein involved in  
1180 transport of polysialic acid in *Escherichia coli* K1. *J. Bacteriol.* **176**: 4025-4033.
- 1181 Yang, Y., Liu, J., Clarke, B.R., Seidel, L., Bolla, J.R., Ward, P.N., Zhang, P., Robinson, C.V.,  
1182 Whitfield, C., and Naismith, J.H. (2021) The molecular basis of regulation of bacterial  
1183 capsule assembly by Wzc. *Nat. Commun.* **12**: 4349.
- 1184 Zeng, H., Wang, S., Zhou, T., Zhao, F., Li, X., Wu, Q., and Xu, J. (2018) ComplexContact: a web  
1185 server for inter-protein contact prediction using deep learning. *Nucleic Acids Res.* **46**: W432-  
1186 W437.

1187 Zimmermann, L., Stephens, A., Nam, S.-Z., Rau, D., Kübler, J., Lozajic, M., Gabler, F., Söding, J.,  
1188 Lupas, A.N., and Alva, V. (2018) A completely reimplemented MPI Bioinformatics Toolkit  
1189 with a new HHpred server at its core. *J. Mol. Biol.* **430**: 2237-2243.

1190

1191

1192 **TABLE 1.  $\beta$ -barrels identified to be syntenic with OPX genes in the REP dataset.**

| $\beta$ -Barrel Query Template          | Total $\beta$ -Barrel Homologues Detected Near OPX Genes | $\beta$ -Barrel Homologues Detected Near Class 1 OPX Genes | $\beta$ -Barrel Homologues Detected Near Class 2A OPX Genes | $\beta$ -Barrel Homologues Detected Near Class 2B OPX Genes | $\beta$ -Barrel Homologues Detected Near Class 3 OPX Genes |
|-----------------------------------------|----------------------------------------------------------|------------------------------------------------------------|-------------------------------------------------------------|-------------------------------------------------------------|------------------------------------------------------------|
| MXAN_7418                               | MXAN_7418: 6                                             | –                                                          | –                                                           | –                                                           | 6                                                          |
| MXAN_3226                               | MXAN_3226: 9                                             | –                                                          | –                                                           | –                                                           | 9                                                          |
| MXAN_1916                               | MXAN_1916: 12                                            | –                                                          | –                                                           | –                                                           | 12                                                         |
| PgaA <sub><math>\beta</math>b</sub>     | PgaA: 8                                                  | 3                                                          | –                                                           | 1                                                           | 4                                                          |
|                                         | PgaA <sub><math>\beta</math>b</sub> : 2                  | 2                                                          | –                                                           | –                                                           | –                                                          |
| GfcD <sub>Cter<math>\beta</math>b</sub> | GfcD: 66                                                 | 44                                                         | 4                                                           | 18                                                          | –                                                          |
|                                         | GfcD <sub>Cter<math>\beta</math>b</sub> : 2              | –                                                          | 1                                                           | 1                                                           | –                                                          |
| YjbH <sub>Cter<math>\beta</math>b</sub> | YjbH: 79                                                 | 55                                                         | 5                                                           | 19                                                          | –                                                          |
|                                         | YjbH <sub>Cter<math>\beta</math>b</sub> : 3              | 1                                                          | 1                                                           | 1                                                           | –                                                          |
| BcsC <sub><math>\beta</math>b</sub>     | BcsC: 5                                                  | 1                                                          | –                                                           | –                                                           | 4                                                          |
|                                         | BcsC <sub><math>\beta</math>b</sub> : –                  | –                                                          | –                                                           | –                                                           | –                                                          |
| AlgE                                    | AlgE: 14                                                 | 6                                                          | –                                                           | 2                                                           | 6                                                          |
| Wzi <sub><math>\beta</math>b</sub>      | Wzi: 133                                                 | 44                                                         | 9                                                           | 48                                                          | 32                                                         |
|                                         | Wzi <sub><math>\beta</math>b</sub> : 28                  | 5                                                          | 1                                                           | 14                                                          | 8                                                          |

1193

1194 **TABLE 2. *Myxococcus xanthus* strains used in this study.**

| Strain | Genotype/Description                           | Source or Reference           |
|--------|------------------------------------------------|-------------------------------|
| SI1    | DZ2 (wild type)                                | (Campos & Zusman, 1975)       |
| TM389  | $\Delta pilA$ ( $\Delta mxan\_5783$ )          | (Ducret <i>et al.</i> , 2012) |
| TM469  | $\Delta wzaX$ (i.e. $\Delta mxan\_7417/epsY$ ) | (Ducret <i>et al.</i> , 2012) |
| SI93   | $\Delta wzpX$ (i.e. $\Delta mxan\_7418/epsX$ ) | This study                    |

1195

1196 **Supplementary Figure S1. Structural homology between Wza<sub>Ec</sub> and KpsD<sub>Ec</sub>.** (A) Fold-  
1197 recognition analysis of KpsD<sub>Ec</sub> (via HHpred) revealing C-terminal structural homology to GfcC (PDB:  
1198 3P42) as well as Wza<sub>Ec</sub> (PDB: 2J58). (B) Profile-based alignment of Wza<sub>Ec</sub> and KpsD<sub>Ec</sub> C-terminal  
1199 sequences from Panel A. Wza<sub>Ec</sub>  $\alpha$ -helix (*dark green cylinders*) and  $\beta$ -strand (*dark blue arrows*)  
1200 structure is depicted as per the 2J58 PDB entry. KpsD<sub>Ec</sub> predicted  $\alpha$ -helix (*light green cylinders*) and  
1201  $\beta$ -strand (*light blue arrows*) secondary structure is indicated as per PSIPRED analysis. Aligned  
1202 residues have been coloured according to Jalview conservation score (out of 10). *Maroon*, 10; *red*,  
1203 9; *orange*, 8; *yellow*, 7; *pink*, 6. Scores of 5 or less have been omitted to improve clarity of the  
1204 figure. The end of KpsD<sub>Ec</sub> structural homology with the stand-alone GfcC protein has been indicated  
1205 as per a previous report (Sande *et al.*, 2019). (C) Tertiary structure model of the KpsD<sub>Ec</sub> C-terminus  
1206 based on structural alignment with Wza<sub>Ec</sub> as indicated in Panel B. N- and C-termini of the displayed  
1207 peptide have been indicated.



## SUPPLEMENTARY FIGURE S1

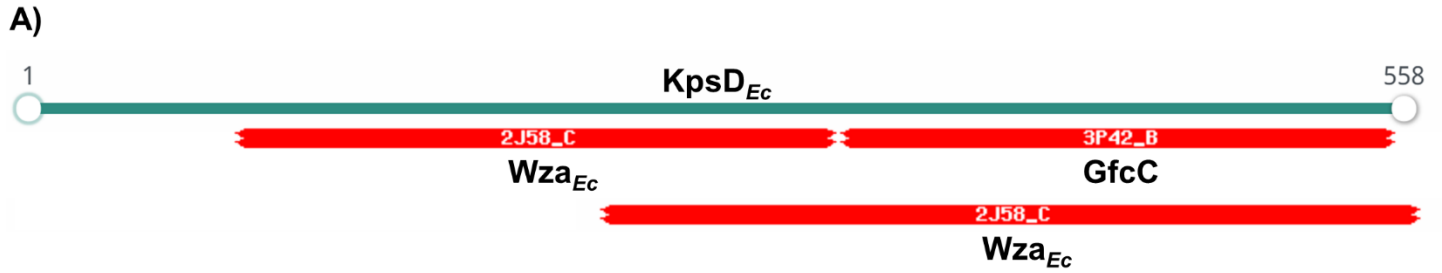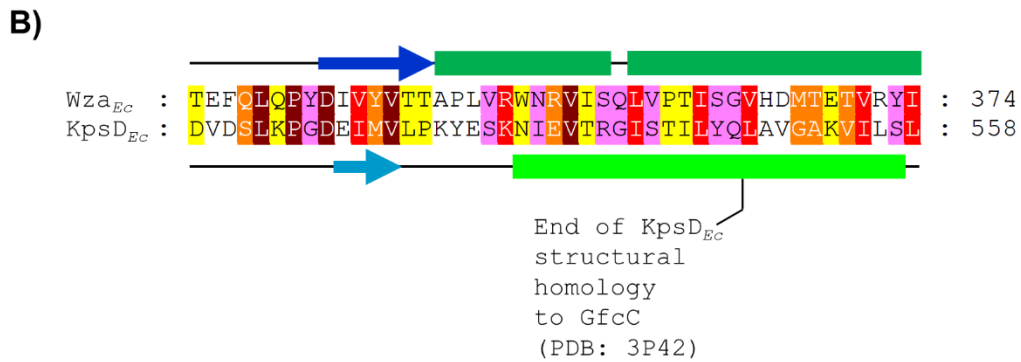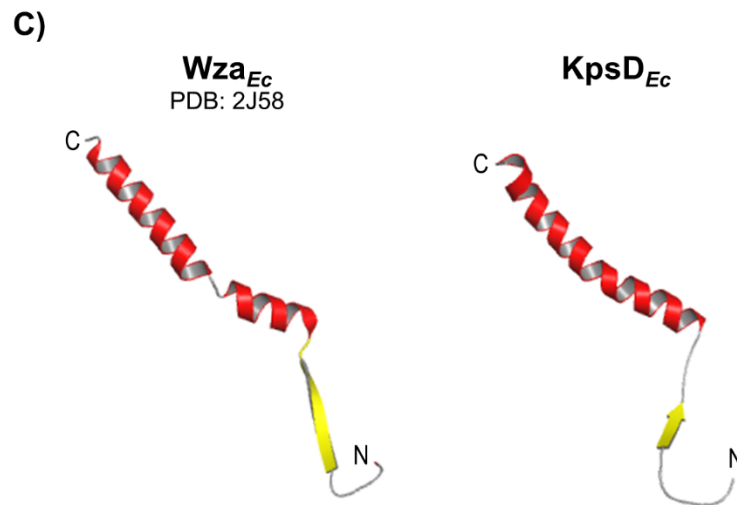

1209 **Supplementary Figure S2. Structural analysis of MXAN\_7418 (WzpX).** (A) Evolutionarily-  
1210 coupled amino acids within the MXAN\_7418 primary structure (determined via RaptorX). (B) Fold-  
1211 recognition analysis of MXAN\_7418 (via HHpred) revealing N-terminal structural homology with two  
1212  $\beta$ -strands from FhuA (PDB: 4CU4) (Mathavan *et al.*, 2014), with the remainder of the protein  
1213 displaying structural homology to PgaA $_{\beta\beta}$  (PDB: 4Y25) (Wang *et al.*, 2016). FhuA and PgaA $_{\beta\beta}$   $\beta$ -  
1214 strand (*dark blue arrows*) structure is depicted as per the respective PDB entries. MXAN\_7418  
1215 predicted  $\beta$ -strand (*light blue arrows*) secondary structure is indicated as per PSIPRED analysis.  
1216 Aligned residues have been coloured according to Jalview conservation score (out of 10). *Maroon*,  
1217 10; *red*, 9; *orange*, 8; *yellow*, 7; *pink*, 6. Scores of 5 or less have been omitted to improve clarity of  
1218 the figure.

## SUPPLEMENTARY FIGURE S2

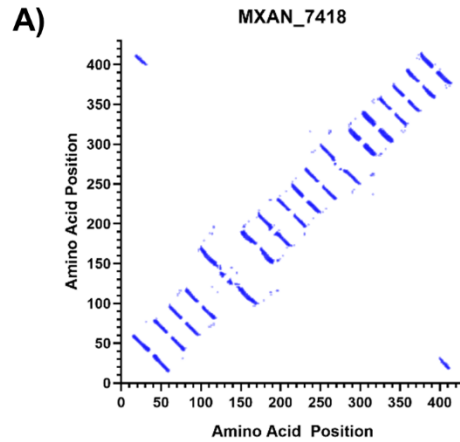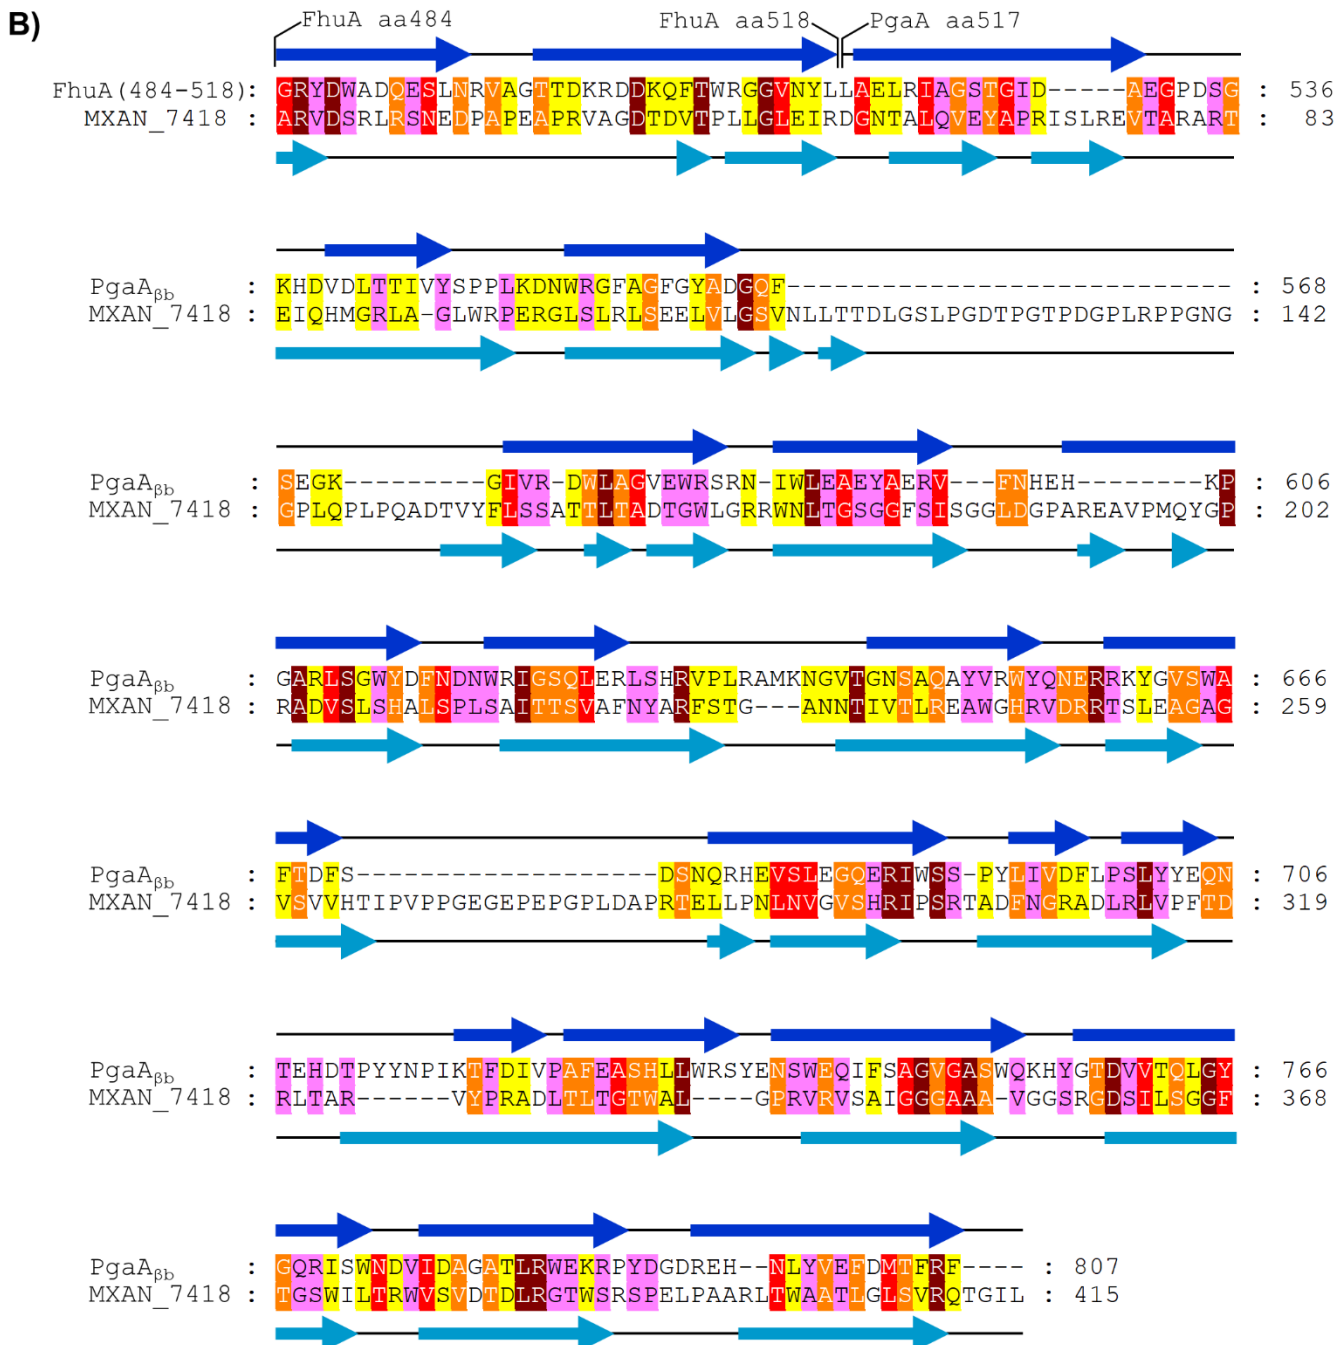

1220 **Supplementary Figure S3. Structural analysis of MXAN\_3226 (WzpS).** (A) Evolutionarily-  
1221 coupled amino acids within the MXAN\_3226 primary structure (determined via RaptorX). (B) Fold-  
1222 recognition analysis of MXAN\_3226 (via HHpred) revealing N-terminal structural homology with two  
1223  $\beta$ -strands from NanC (PDB: 2WJR) (Wirth *et al.*, 2009), with the remainder of the protein displaying  
1224 structural homology to PgaA <sub>$\beta$ b</sub> (PDB: 4Y25) (Wang *et al.*, 2016). NanC and PgaA <sub>$\beta$ b</sub>  $\beta$ -strand (*dark*  
1225 *blue arrows*) structure is depicted as per the respective PDB entries. MXAN\_3226 predicted  $\beta$ -  
1226 strand (*light blue arrows*) secondary structure is indicated as per PSIPRED analysis. Aligned  
1227 residues have been coloured according to Jalview conservation score (out of 10). *Maroon*, 10; *red*,  
1228 9; *orange*, 8; *yellow*, 7; *pink*, 6. Scores of 5 or less have been omitted to improve clarity of the  
1229 figure.

## SUPPLEMENTARY FIGURE S3

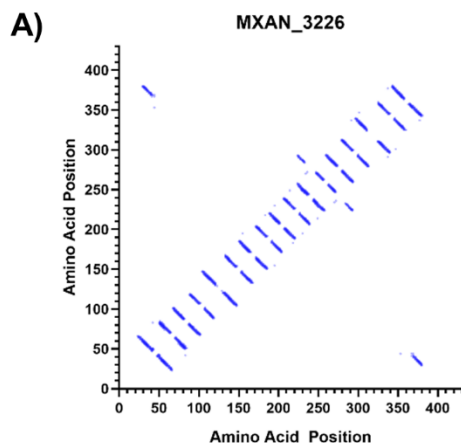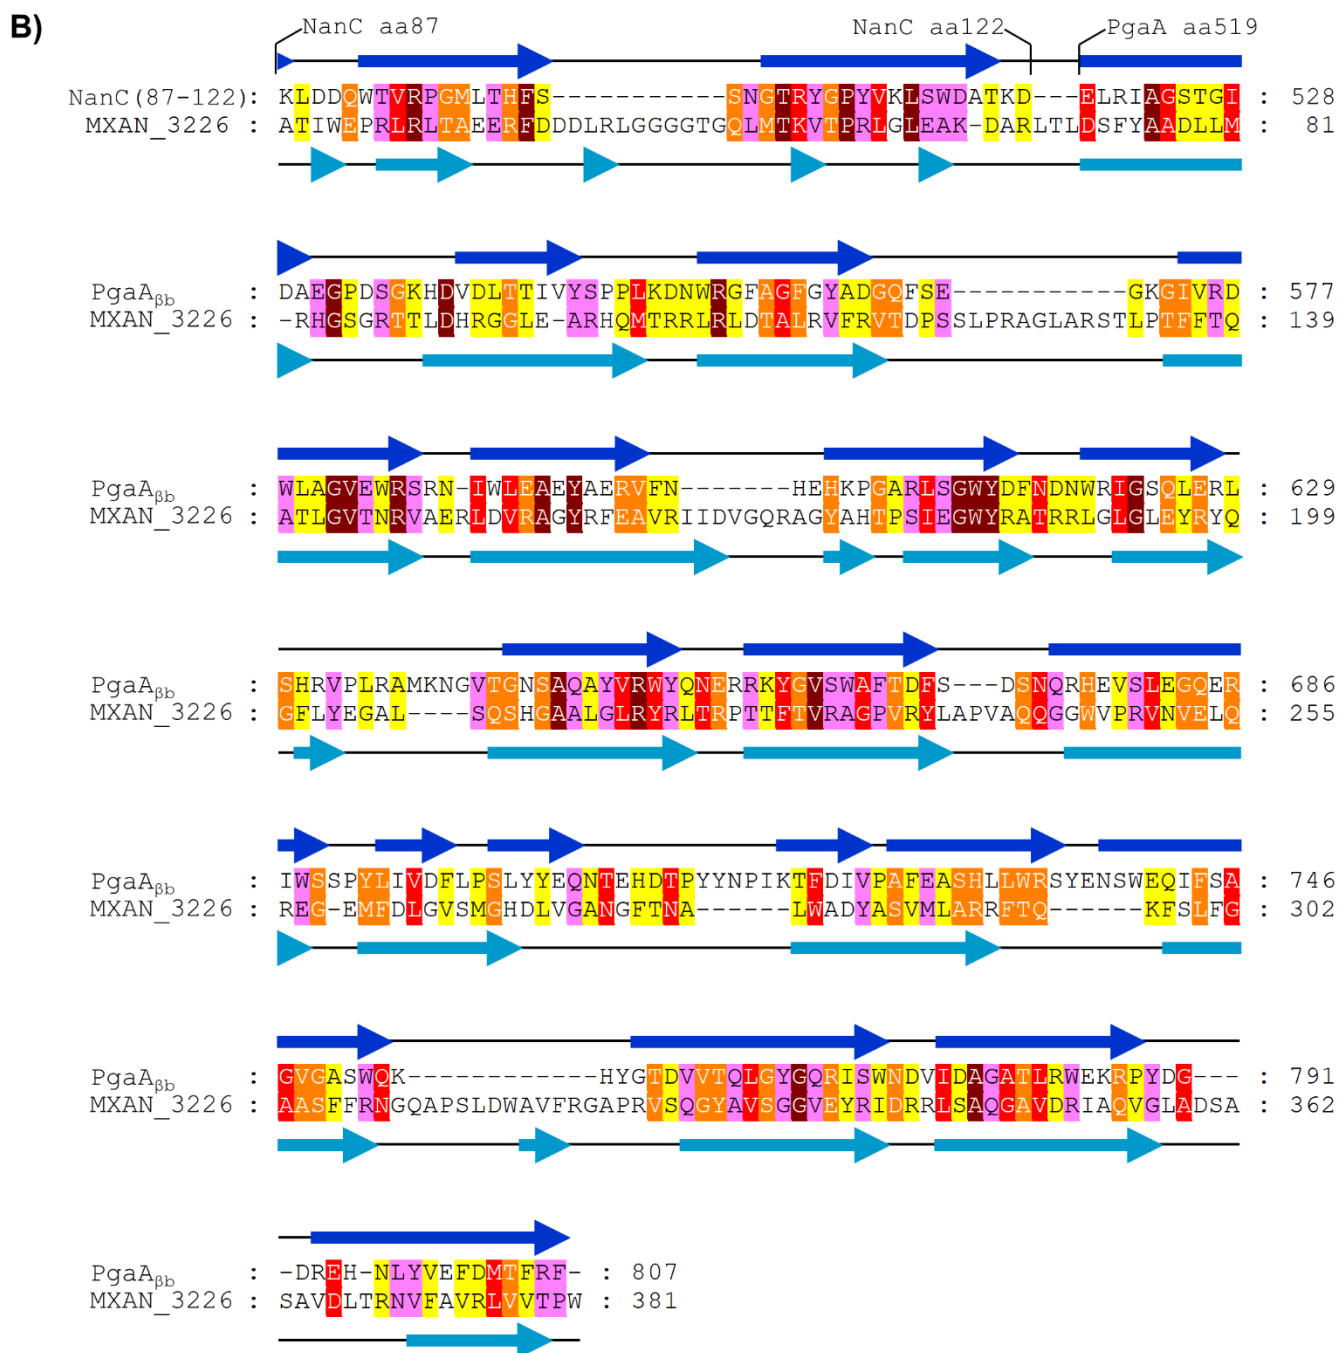

1231 **Supplementary Figure S4. Structural analysis of MXAN\_1916 (WzpB).** (A) Evolutionarily-  
1232 coupled amino acids within the MXAN\_1916 primary structure (determined via RaptorX). (B) Fold-  
1233 recognition analysis of MXAN\_1916 (via HHpred) revealing N-terminal structural homology with two  
1234  $\beta$ -strands from PagL (PDB: 2ERV) (Rutten *et al.*, 2006), with the remainder of the protein displaying  
1235 structural homology to PgaA <sub>$\beta$ b</sub> (PDB: 4Y25) (Wang *et al.*, 2016). PagL and PgaA <sub>$\beta$ b</sub>  $\beta$ -strand (*dark*  
1236 *blue arrows*) structure is depicted as per the respective PDB entries. MXAN\_1916 predicted  $\alpha$ -helix  
1237 (*light green cylinders*) and  $\beta$ -strand (*light blue arrows*) secondary structure is indicated as per  
1238 PSIPRED analysis. Aligned residues have been coloured according to Jalview conservation score  
1239 (out of 10). *Maroon*, 10; *red*, 9; *orange*, 8; *yellow*, 7; *pink*, 6. Scores of 5 or less have been omitted  
1240 to improve clarity of the figure.

## SUPPLEMENTARY FIGURE S4

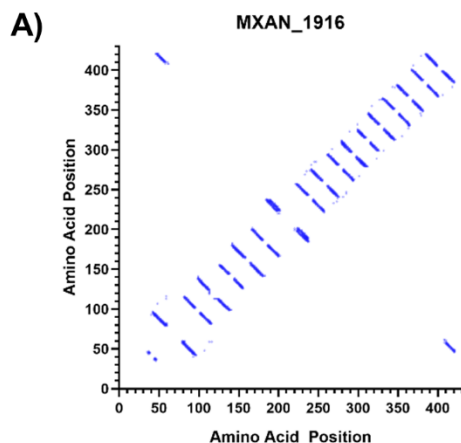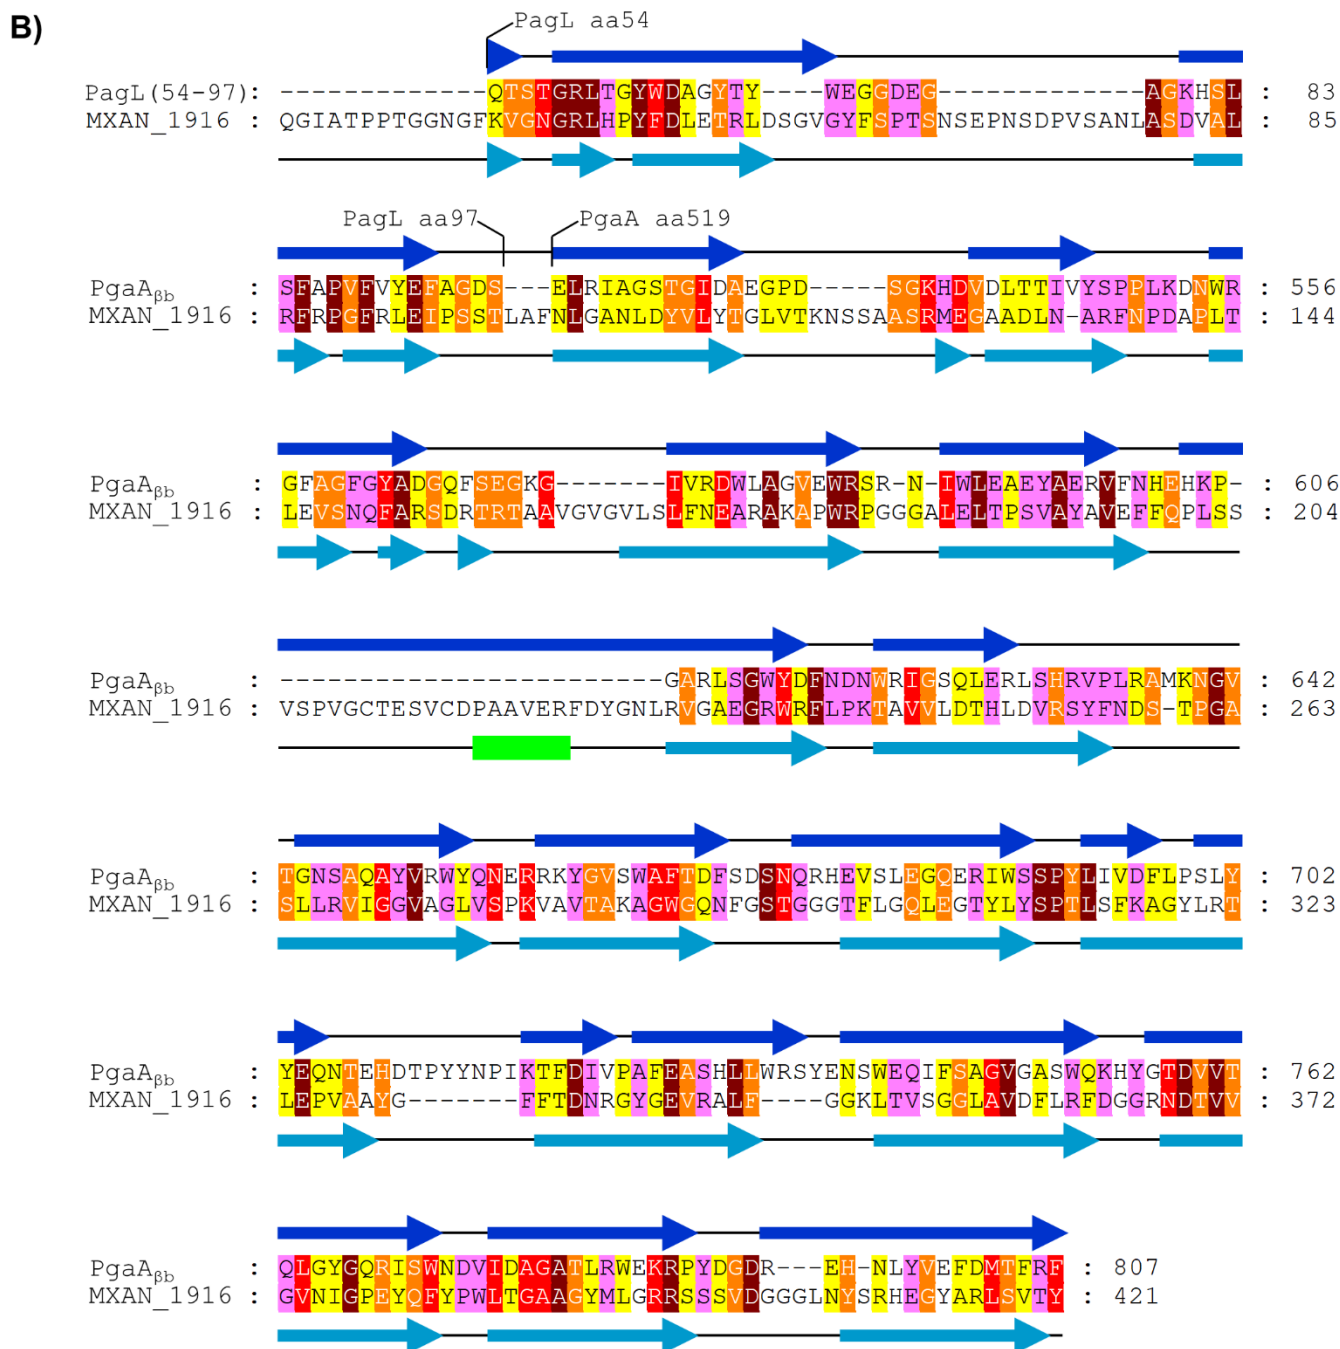

1242 **Supplementary Figure S5. Structural homology between Pga $\beta$ b, GfcD, and YjbH. (A)** Fold-  
1243 recognition analysis of GfcD and YjbH (via HHpred) revealing N-terminal structural homology of  
1244 each to the amyloid secretion  $\beta$ -barrel FapF (PDB: 5O65) (Rouse *et al.*, 2017) and C-terminal  
1245 structural homology of each to PgaA $\beta$ b (PDB: 4Y25) (Wang *et al.*, 2016). **(B)** AlphaFold2-generated  
1246 tertiary structure models for GfcD and YjbH, displayed alongside the Pga $\beta$ b X-ray crystal structure for  
1247 comparison. Proteins have been coloured with a spectrum, from the N-terminus (*blue*) to the C-  
1248 terminus (*red*). **(C)** Multiple-sequence alignment of the PgaA $\beta$ b (aa 511-807), GfcD<sub>Cter $\beta$ b</sub> (aa 425-  
1249 698), and YjbH<sub>Cter $\beta$ b</sub> (aa 423-698) segments. Aligned residues have been coloured according to  
1250 Jalview conservation score (out of 10). *Maroon*, 10; *red*, 9; *orange*, 8; *yellow*, 7; *pink*, 6. Scores of 5  
1251 or less have been omitted to improve clarity of the figure.



## SUPPLEMENTARY FIGURE S5

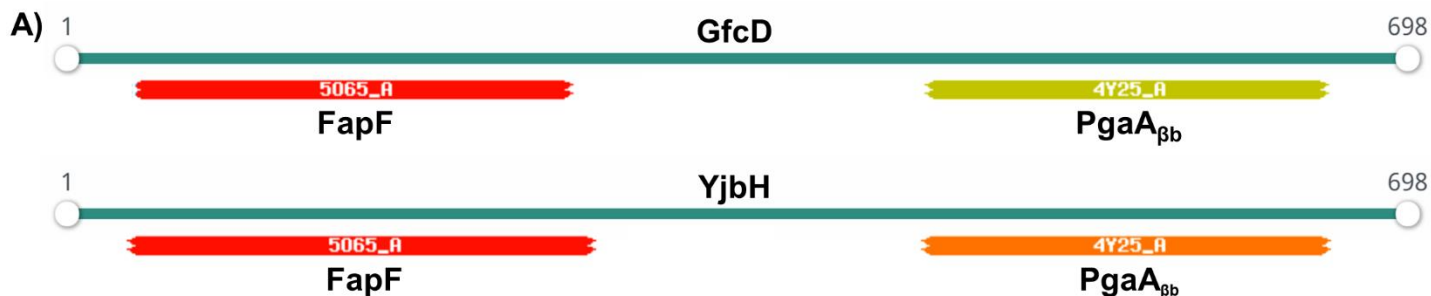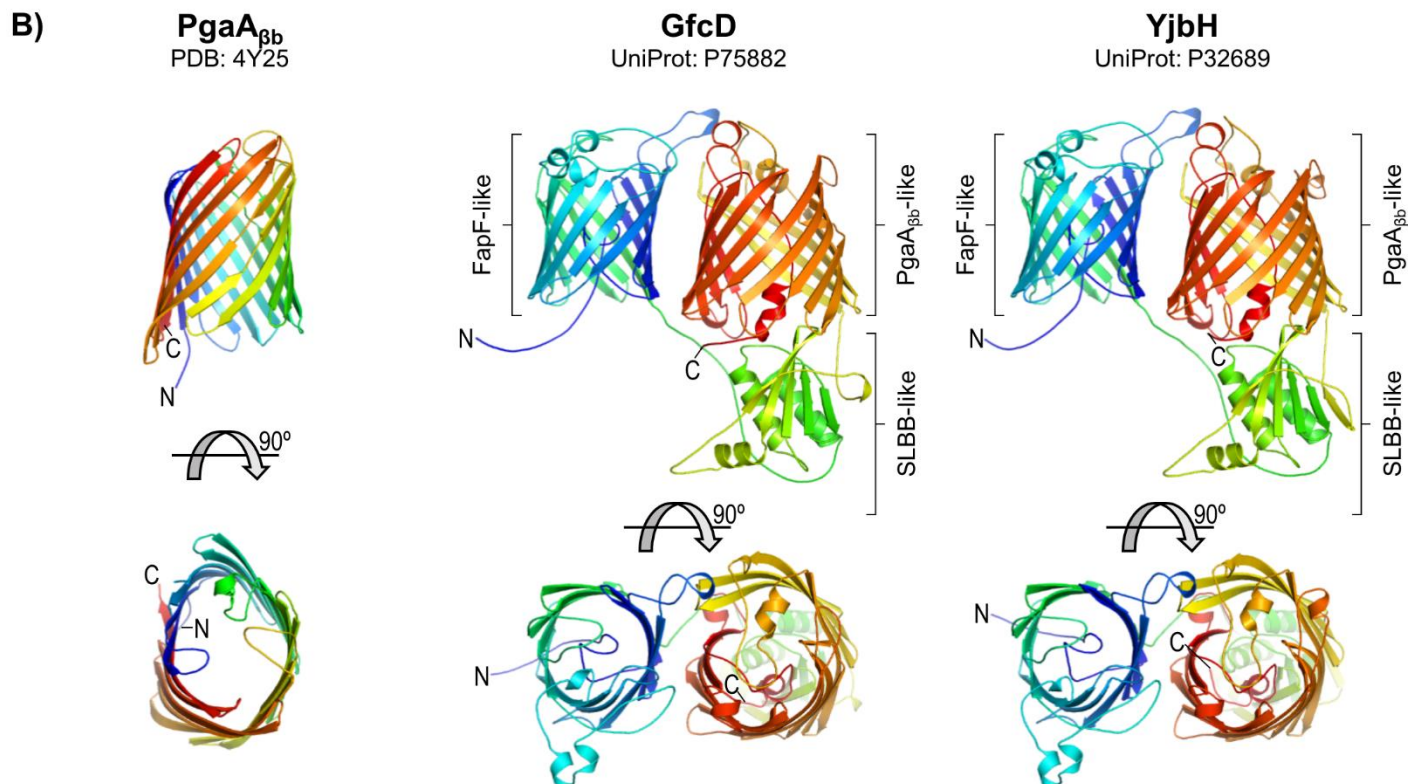

**C)**

GfcD<sub>Cterβb</sub> : FSYSFNPTLSQSLGGPEDFYMFQLG----LMSSARYWFTDHLILLDGGIFTNIYNNYDKFK : 480  
YjbH<sub>Cterβb</sub> : FDFHIDPVLNQS VGGPENFYMYQLG----VMGTADLWLTDLHLLTGS LFANLANNYDKFN : 478  
PgaA<sub>βb</sub> : -AVDVHNLAE LR IAGSTG I DAEGPDSGKHDV DLT T IVYSPPLKDNWRGFAGFGYADGQFS : 569

GfcD<sub>Cterβb</sub> : SLLLPADSTLPRV RTHIRDYVRNDVYLN LQANYFADLG--NGFYGQVYGGYLETM YAGV : 538  
YjbH<sub>Cterβb</sub> : YTNPPQD SHLPRV RTHVREYVQNDVYVNN LQANYFQHLG--NGFYGQVYGGYLETMFGGA : 536  
PgaA<sub>βb</sub> : EGKGI VRDWLAGVEWR SRNIWLEAEYA ERVFNHEHKPGARLSGWYDFNDNWRIGS QLRL : 629

GfcD<sub>Cterβb</sub> : GSELLYRPLDACWALGVDVNYVK--QRDWD---NMMRFTDYS-----TPTGFVTAYW : 585  
YjbH<sub>Cterβb</sub> : GAEVLYRPLDSNWAFLDANYVK--QRDWRSAKDMMKFTDYS-----VKTGHLTAYW : 586  
PgaA<sub>βb</sub> : SHRVPLRAMKNGVTGN SAQAYVRWYQNER RRYGVSWAFTDFS DSNQRHEVSLE GQER IWS : 689

GfcD<sub>Cterβb</sub> : NPPTLNGVLMKLSVGQYLAKDKG-----ATIDVAKRFD SGVAVGVWAAISNVSKDDY GEG : 640  
YjbH<sub>Cterβb</sub> : TPSFAQDVLVKASVGQYLAGDKG-----GTLEIAKRFD SGVVVGGYATITNVSKEEY GEG : 641  
PgaA<sub>βb</sub> : SPYLIVDFLPSLYEQNTEHDT PYYNPIKTFD IVP AFEASHLLWRSYENSWEQ IFSAGVG : 749

GfcD<sub>Cterβb</sub> : GFSKGFYISIPFDLMTIGPNRNRAVSWTPLTRDGGQMLSRKYQLYPM TAE REVPVVGQ : 698  
YjbH<sub>Cterβb</sub> : DFTKGVYVSVPLDLFSSGPTRSRAAI GW TPLTRDGGQQLGRKFQLYDMTSDRSV NFR- : 698  
PgaA<sub>βb</sub> : ASWQKH YGT DVVTQLGYGQRISWNDVIDAGATLRWEKRPYDGDREHNLVYEFDMTFRF : 807

1253 **Supplementary Figure S6. Structural schematic of polymer translocation across the**  
1254 **periplasm in *M. xanthus*.** Components from the BPS secretion pathway have been used as  
1255 representative proteins for those in the EPS and MASC pathways as well. All proteins, spaces, and  
1256 distances have been depicted at the same relative scale across a representative 327 Å periplasmic  
1257 space in a *M. xanthus* cell. X-ray crystal structures for Wza<sub>Ec</sub> (chain A) and Wzc<sub>Ec</sub> (chains F and G)  
1258 have been provided as per the PDB files 2J58 (Dong *et al.*, 2006) and 7NII (Yang *et al.*, 2021)  
1259 (respectively) for size references. Structure models for WzaB (Fig. 1B) and WzpB (Fig. 5A) were  
1260 already generated in this investigation. Models for the PCP protein WzcB were generated using  
1261 either AlphaFold2 (resulting in an extended conformation), or MODELLER (specifically against the  
1262 7NII\_F template, resulting in a compact conformation). High-confidence co-evolving amino acids  
1263 between WzcB and WzaB have been highlighted with *green* (86% probability) and *cyan* (81%  
1264 probability) spheres.

## SUPPLEMENTARY FIGURE S6

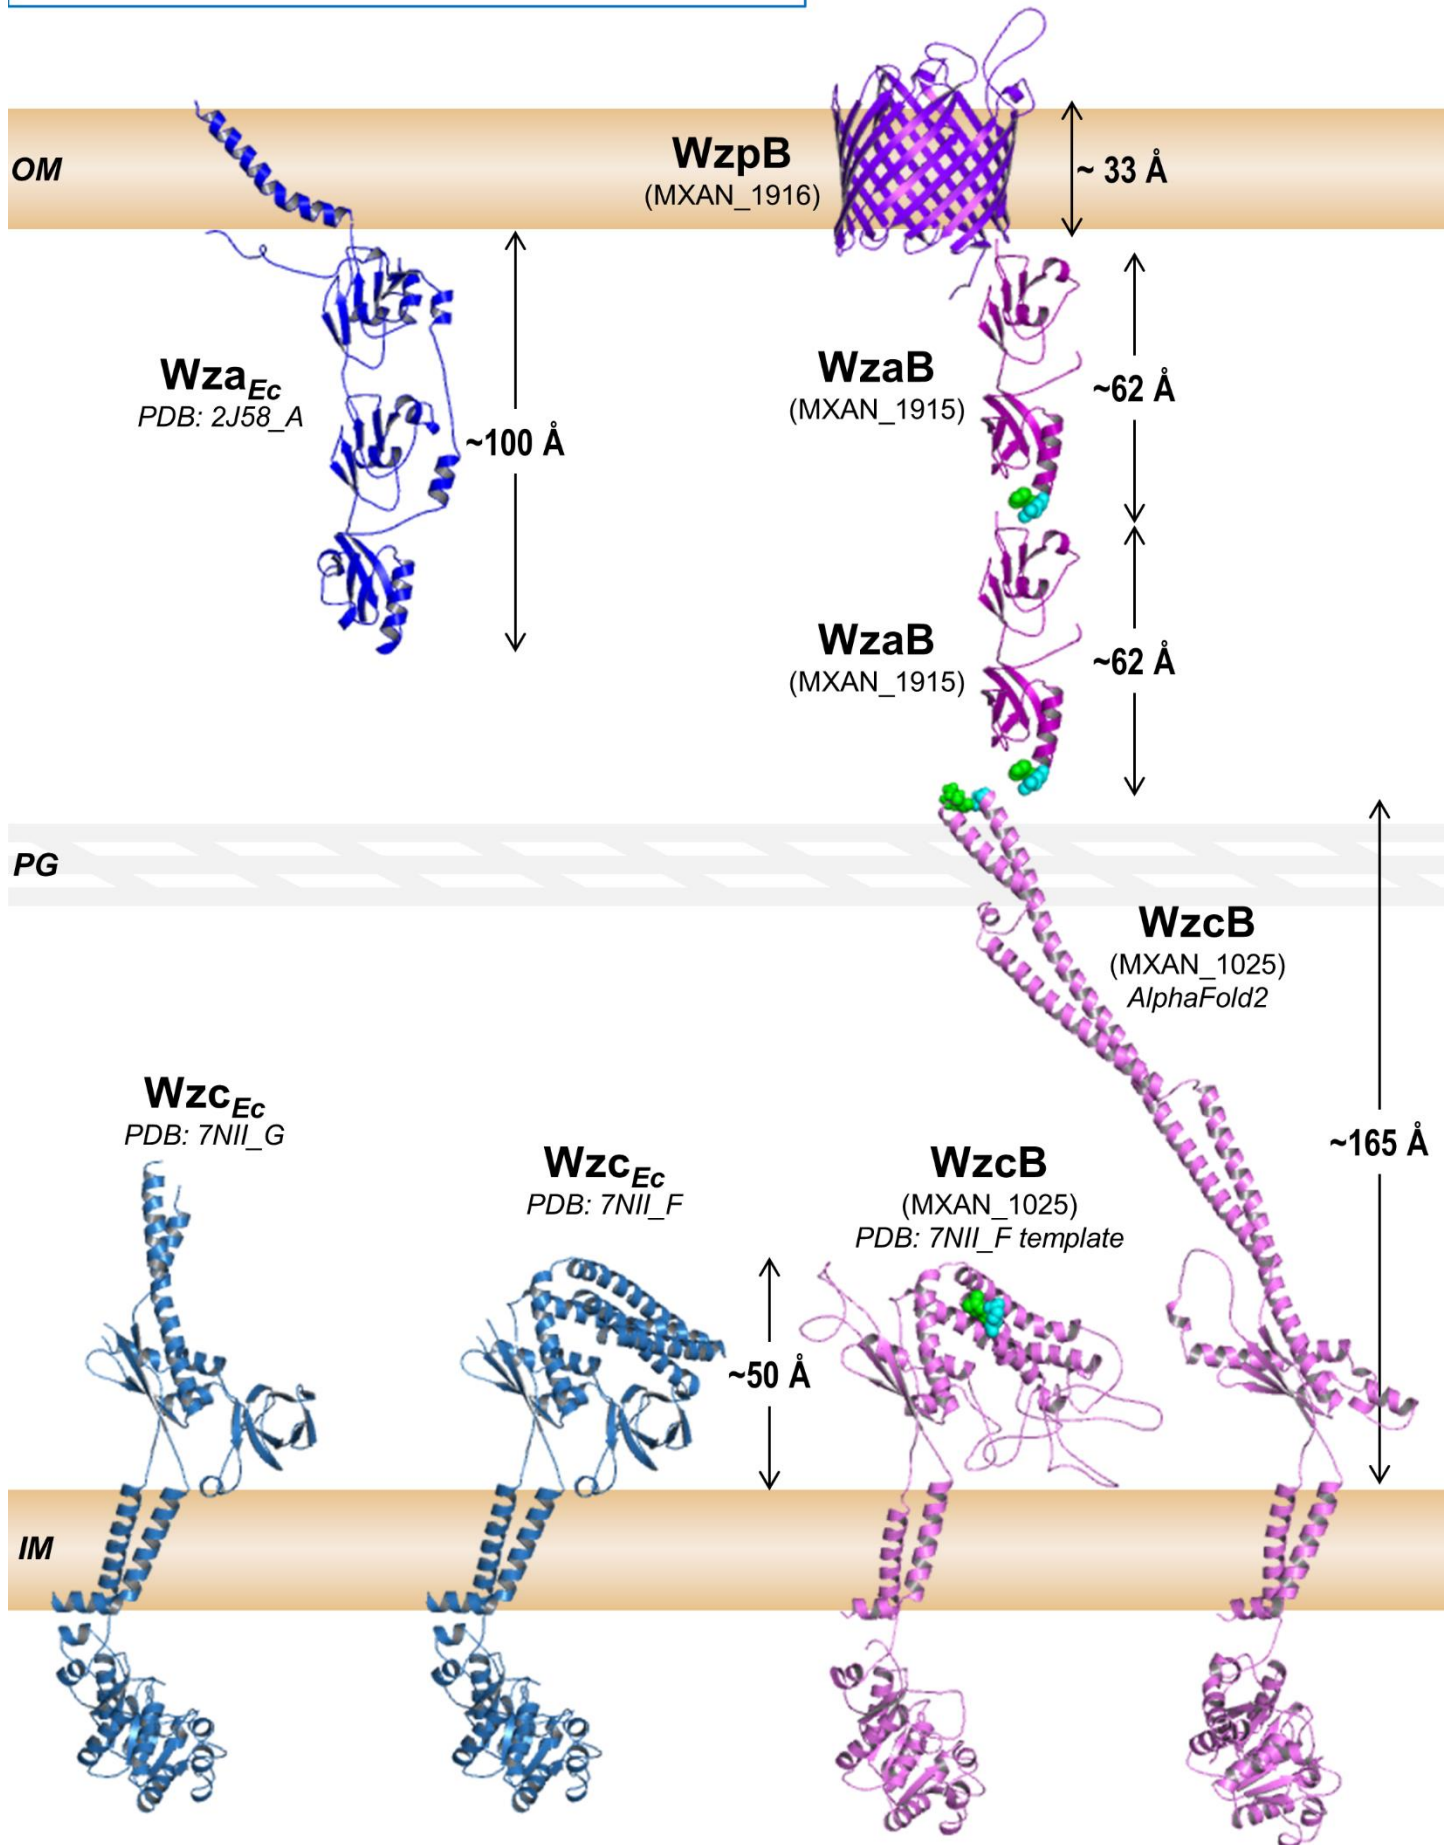

1266 **SUPPLEMENTARY TABLE LEGENDS**

1267 **Supplementary Table S1. MYXO dataset analysis. (A)** Protein-wise OPX classification within 61  
1268 myxobacterial genomes. **(B)** Distribution of OPX-protein types within myxobacterial genomes. **(C)**  
1269 Synteny analysis of OPX-protein types with  $\beta$ -barrel protein homologues.

1270 **Supplementary Table S2. REP dataset analysis. (A)** Protein-wise OPX classification within 3662  
1271 Representative/Reference genomes. **(B)** Distribution of OPX-protein Classes within 3662 genomes.  
1272 **(C)** Synteny distribution of OPX-protein types with  $\beta$ -barrel protein homologues. **(D)** Arrangement of  
1273 syntenic OPX-protein types with  $\beta$ -barrel protein homologues.

1274 **Supplementary Table S3. NR dataset analysis. (A)** Protein-wise OPX classification within NR-  
1275 database proteins.

1276 **Supplementary Table S4. Distribution of OPX-protein types at Phylum, Class, Order, Family,**  
1277 **and Genus level taxonomy.**

1278 **Supplementary Table S5. Evolutionary couplings between proteins.** Co-evolving amino acids  
1279 between PCP and OPX pairs, as well as OPX and Wzp  $\beta$ -barrel pairs, are presented for constituents  
1280 of the EPS, BPS, and MASC pathways.
